# Supplementary material for: Psychological inoculation improves resilience against misinformation on social media
Source: PubMed Central journal article supplement (PMC9401631; doi:10.1126/sciadv.abo6254), 2022-08-24
Supplement: sciadv.abo6254_sm.pdf [file sciadv.abo6254_sm.pdf]

Supplementary Materials for  
**Psychological inoculation improves resilience against misinformation on  
social media**

Jon Roozenbeek *et al.*

Corresponding author: Jon Roozenbeek, [jjr51@cam.ac.uk](mailto:jjr51@cam.ac.uk)

*Sci. Adv.* **8**, eabo6254 (2022)  
DOI: 10.1126/sciadv.abo6254

**This PDF file includes:**

Notes i to x  
Supplementary Analyses  
Figs. S1 to S8  
Tables S1 to S56  
References

## Notes

<sup>i</sup> We deviate from our preregistrations for Studies 1-5 in several ways. First, we preregistered that we would conduct linear regressions to check if there are “three-way interactions” with each of the covariates. This was an error on the part of the authors, because there are only two interacting variables (condition and covariate), plus the outcome variable. Therefore, we instead check for *two-way* interactions between condition (treatment - control) and each of the covariates, predicting technique discernment (see Tables S44-S48 in the supplement); for additional clarity, we also provide linear regressions with all these covariates in the same model, for each of our four outcome variables, see Tables S23-S27. Second, we did not collect our preregistered covariates of minority status and region of origin, and so do not include these analyses in our manuscript.

<sup>ii</sup> We deviate from our preregistration for Study 7 in several ways. First, we preregistered that we would administer 5 survey items per study, but due to cost limitations could only administer 3. Second, we aimed to collect 4,000 survey responses per question for a total of 80,000 responses. As it proved to be more difficult than anticipated to collect these responses (most likely because the survey questions were shown at the very end of a YouTube video), we did not achieve our target sample; see Table S55. Third, we do not provide Bayesian analyses here due to space limitations. Fourth, we anticipated a Smallest Effect Size of Interest of Cohen’s  $d = 0.10$ ; we instead provide effect sizes in Cohen’s  $h$  (see again Table S55), as this is the most applicable effect size for the two-proportion  $z$ -tests that we present here. Finally, we preregistered that we would conduct a series of moderation analyses, but we were not able to obtain any demographic data from YouTube, and so are unable to provide these analyses.

<sup>iii</sup> For the confidence measure, discernment is not a meaningful analytical construct, because a hypothetical participant who is both highly confident that a manipulative post contains a particular manipulation technique and that a non-manipulative post does *not* contain such a technique would nonetheless have low “confidence discernment”.

<sup>iv</sup> In a further analysis (not preregistered), we checked if participants update their confidence in the right direction, i.e., if they only become more confident if they are also more accurate in their assessment. To do so, we conducted a series of linear regressions with technique recognition of manipulative and neutral stimuli as the dependent variables and the confidence measures and the condition (inoculation/control) as independent variables. For all five studies, we find that, for the manipulative stimuli, the perceived use of a technique is significantly and positively correlated with participants’ confidence in recognizing these techniques, when controlling for experimental condition (all  $p$ -values  $< 0.001$ ). For the neutral stimuli, we find that perceived technique use is significantly and *negatively* correlated with confidence (all  $p$ -values  $< 0.008$ ), in the sense that participants who indicate that neutral stimuli are *not* manipulative ((i.e., they are more correct in their assessment) also tend to be highly confident in this assessment. We thus find that greater accuracy in manipulation technique recognition is consistently correlated with greater confidence, indicating that participants update their confidence for the right reason, and not due to overconfidence. See Tables S36 and S37.

<sup>v</sup> We also conducted a series of exploratory analyses of the sharing measure that excluded “never sharers”, i.e., participants who answered “strongly disagree” on the sharing measure for all stimuli. The exclusion of participants who would never share either manipulative or neutral posts with people in their network follows guidelines established in previous work by Pennycook et al. (54); these results are highly similar to those reported below, and can be found in Table S35.

<sup>vi</sup> Technique recognition for control group participants is higher in some studies than others: an ANOVA shows that technique recognition among control group participants differs significantly across studies ( $F(4,2787) = 84.1, p < 0.001, \eta^2 = 0.109, d = 0.70$ ), and is highest in the *scapegoating* study, for which we also report a descriptively lower effect size than for the other four studies (see Table S33). We find the same pattern for trustworthiness (see Table S34). Thus, it is possible that compared to the other manipulation techniques, participants were better at spotting scapegoating in social media content even without an intervention, which may explain the lower effect size and non-significant effects for the trustworthiness and sharing intentions measures.

<sup>vii</sup> In addition to the preregistered moderation analyses, we conducted a series of (non-preregistered) ANOVAs with technique recognition as the dependent variable and condition (inoculation – control) and political ideology (converted from a 7-point scale to “left”, “moderate” and “right”), “bullshit receptivity” (converted to “high” and “low”), and analytical thinking (also converted to “high” and “low”), respectively, as independent variables, separately for each study. We find that technique recognition is significantly higher in the inoculation condition than in the control condition for those on the left and right, as well as for moderates (all  $p$ -values  $< 0.003$ ), for participants with high and low “bullshit receptivity” (all  $p$ -values  $< 0.01$ ), and for participants with high and low analytical thinking scores (all  $p$ -values  $< 0.015$ ), with two exceptions: there is no difference between conditions among moderates for the “emotional language” study ( $p = 0.685$ ), and for moderates and conservatives for the “scapegoating” study ( $p = 0.148$  and  $p = 0.652$ , respectively). See Tables S23-S27, S38-S43, and S52-S54 for the regression tables, as well as Figures S2-S6.

<sup>viii</sup> This type of survey is called a YouTube “brand lift” survey. For more information about how this works, see: <https://support.google.com/youtube/answer/4574026?hl=en>.

<sup>ix</sup> We note that Item 1 for the *emotional language* survey (“What this airline did for its passengers will make you tear up - SO heart-warming.”) is different from the other two headlines in that it does not make use of *negative* emotions; as the *emotional language* video specifically inoculates people against the use of negative emotions such as fear, anger, or outrage, it is possible that this discrepancy between the headline and the lessons learned in the video explains the lack of a significant effect for Item 1.

<sup>x</sup> As an example, one of the manipulative (incoherent) posts from the *incoherence* study reads: “The ‘scientific consensus’ on global warming is a myth. Only a few scientists dare go against the grain. They are our heroes, and they should be celebrated”. This post is incoherent because it simultaneously asserts that climate change consensus does not exist and that there are only a few scientists who disagree with the consensus.<sup>34</sup> Its non-manipulative counterpart reads “While there is an ongoing discussion about the exact level of agreement, approximately 97% of scientists

*agree that anthropogenic climate change is happening*". For the *emotional language* study, we used real-world examples of emotionally manipulative social media content as stimuli, following Brady et al. (22), and conducted a stimuli validation test using a sentiment analysis library to ensure that the manipulative stimuli capture the intended dimension of emotionality and that the neutral stimuli do not; please see the Supplementary Analyses section for further details.

## Supplementary Analyses

### *Robustness checks*

As preregistered, we conducted a series of linear regressions with robust standard errors at the rating level for the technique recognition, trustworthiness and sharing measures, clustered on study participants and stimuli (manipulative vs neutral), following the approach laid out by Pennycook et al. (54) The regression tables can be found in Tables S28-S32. The results show that the findings reported in the main body are robust, except for one: trustworthiness discernment for the *incoherence* video is significant when conducting a Student's ( $p = 0.002$ ) and Bayesian  $t$ -test ( $BF_{10} = 7.876$ , indicating strong support in favor of hypothesis **H3** (55)), but not when doing a linear regression at the rating level ( $p = 0.168$ ).

In addition (although not preregistered), we provide Bayesian  $t$ -test results alongside the standard Student's  $t$ -tests for the averaged manipulative, neutral and discernment scores, as well as for all individual stimuli. In line with standard practices for reporting Bayesian statistics, we used a Cauchy prior, centered around 0, with a width parameter of 0.707, representing an 80% chance that the observed effect sizes are between -2 and 2, as recommended by van Doorn et al (55). Similarly, a Bayes Factor<sub>10</sub> ( $BF_{10}$ ) lower than 3 is considered weak support for the directional hypothesis; between 3 and 5 is considered medium support, and  $> 5$  strong support (55). These Bayesian analyses support the findings reported in the main body; see Supplementary Tables S3-S22.

Finally, because it is known that many people on social media never share news or other information, we conducted a series of exploratory analyses of the sharing measure that excluded “never sharers”, i.e., participants who answered “strongly disagree” (1 out of 7) on the sharing measure for all stimuli. The exclusion of participants who would never share either manipulative

or neutral posts with people in their network follows guidelines established in previous work by Pennycook et al. (54). When these “never-sharers” are excluded, we find a significant difference in sharing discernment for the *incoherence* study ( $M_{control} = 0.70$  vs  $M_{inoculation} = 0.87$ ,  $M_{diff} = 0.17$ ,  $t(2,872) = 2.332$ ,  $p = 0.02$ ,  $d = 0.16$ , 95%CI [0.025, 0.29]), but not for *scapegoating* ( $M_{control} = 0.67$  vs  $M_{inoculation} = 0.82$ ,  $M_{diff} = 0.15$ ,  $t(2,850) = 1.835$ ,  $p = 0.067$ ,  $d = 0.13$ , 95%CI [-0.009, 0.26]). See Table S35.

### ***Emotional language study – stimuli validation test***

While the manipulation techniques tested in Studies 2-5 (*incoherence*, *false dichotomies*, *scapegoating* and *ad hominem attacks*) are straightforward and require no further elaboration, this is not the case for Studies 1 and 6 (*emotional language*) (22, 56). For these studies, the manipulative social media posts were selected from real-world examples of social media content that seeks to evoke strong negative emotions such as fear or outrage in a manipulative manner (27, 46, 50). To establish whether social media posts that contain manipulative content indeed make more use of negative emotional language and fearmongering than their matched controls (which were formulated to be emotionally neutral), we conducted a sentiment analysis using Empath, a Python-based linguistic sentiment analyzer (57). Empath iterates over a corpus of text (in this case the social media posts), and assigns numerical values to a particular category of language use (e.g., “fear”, “anger”, or “emotional language”) based on whether words in the text appear in its dictionary under that category. This method allows us to compare the extent to which emotional language is used in the emotional-manipulative and neutral social media posts. Figure S1 shows the results for the categories “emotional language”, “negative emotion”, “fear”, “hate” and “suffering”.

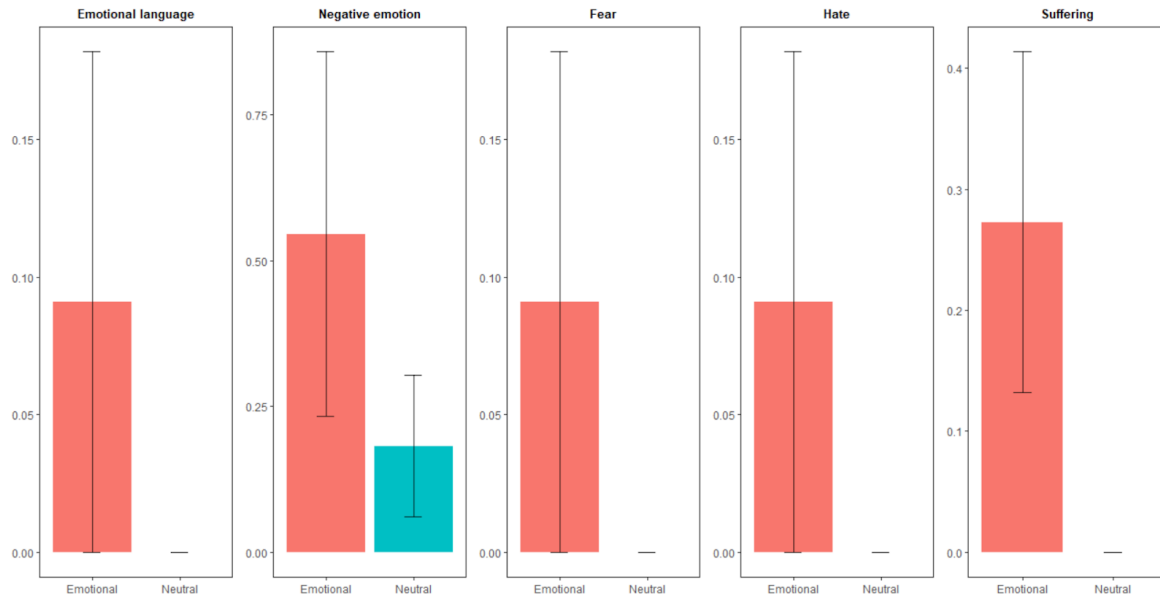

**Fig. S1.** Bar graphs for unnormalized Empath scores for the *emotional language, negative emotion, fear, hate* and *suffering* Empath categories, by stimulus type (manipulative vs neutral). The (unnormalized) Empath scores are indicated on the Y-axis of each bar graph. The red bars show the Empath scores for the emotional social media posts, the blue bars (where visible) show the Empath scores for the neutral posts. Error bars show the standard error.

Figure S1 shows that the emotional-manipulative social media posts use emotional language, negative emotion, fear-based language, hate-based language, and language related to suffering, whereas the non-emotional (neutral) posts contain no language related to these categories (except negative emotion). These results confirm that our test stimuli capture the intended dimension of (negative) emotionality.

## Supplementary Figures

**Figure S2.**

Studies 1-5: technique recognition (Diff-Technique, or technique recognition), broken down by political ideology (where 1-3 on a 7-point scale is converted to “left”, 4 is “moderate” and 5-7 is “right”). For the full moderation analysis, see Tables S38 and S39. Figure created using Jamovi ([www.jamovi.org](http://www.jamovi.org)).

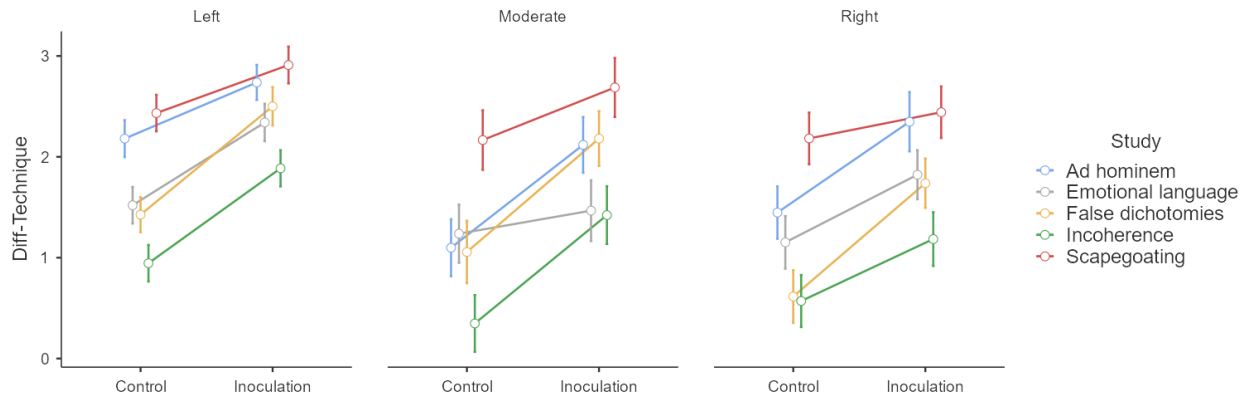

**Figure S3.**

Studies 1-5: technique recognition (Diff-Technique, or technique recognition), broken down by “bullshit receptivity” (where below-average “bullshit receptivity” scores are converted to “low” and above-average scores to “high”). For the full moderation analysis, see Tables S40 and S41. Figure created using Jamovi ([www.jamovi.org](http://www.jamovi.org)).

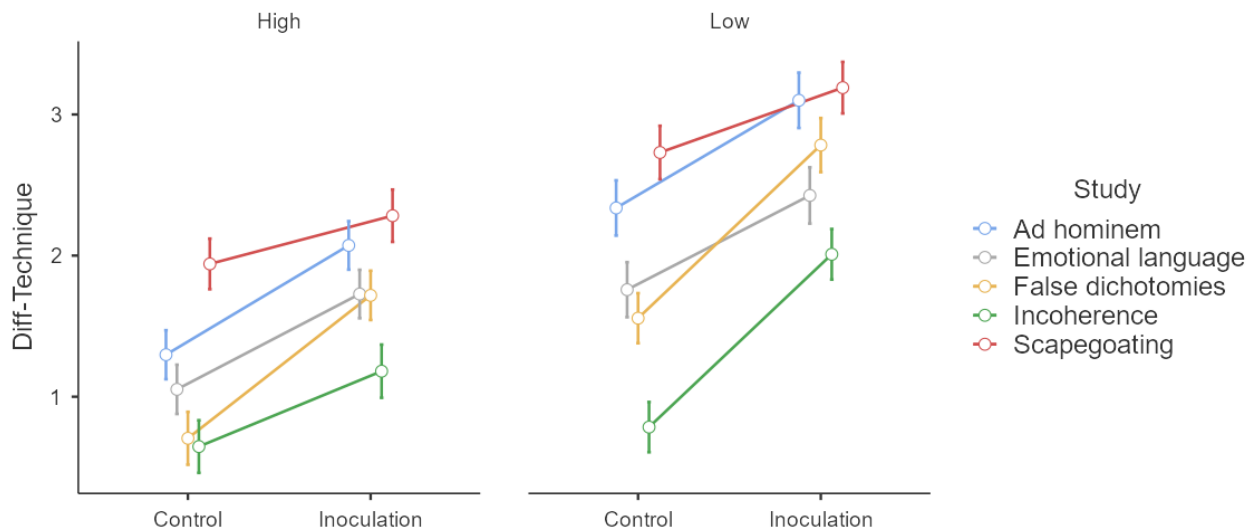



**Figure S4.**

Studies 1-5: technique recognition (Diff-Technique, or technique recognition), broken down by analytical thinking (where a score of 0 or 1 out of 3 is converted to “low” and a score of 2 or 3 out of 3 to “high”). For the full moderation analysis, see Tables S42 and S43. Figure created using Jamovi ([www.jamovi.org](http://www.jamovi.org)).

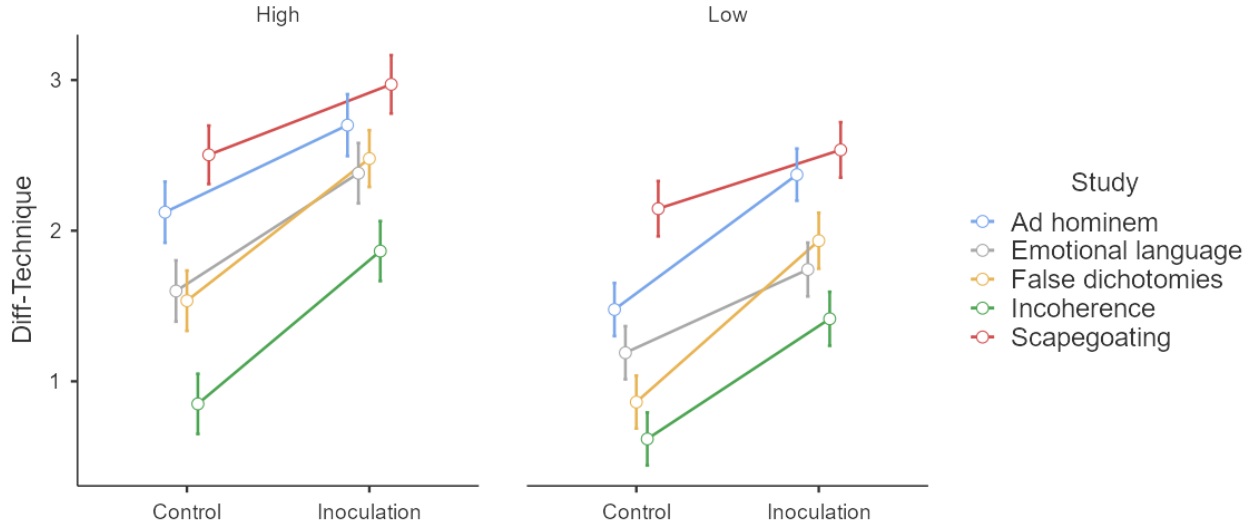

**Figure S5.**

Study 6: technique discernment, trustworthiness discernment, and sharing discernment, as moderated by actively open-minded thinking (AOT) (40). See also Table S53. Figure created using Jamovi ([www.jamovi.org](http://www.jamovi.org)).

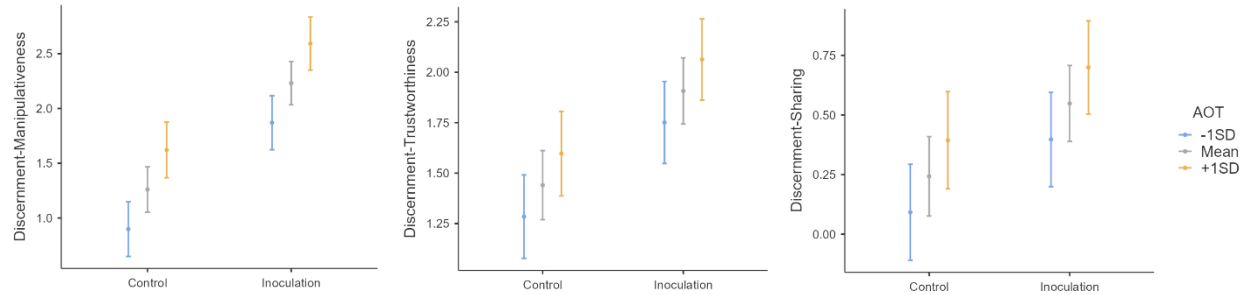

**Figure S6.**

Study 6: technique discernment, trustworthiness discernment, and sharing discernment, as moderated by Veracity Discernment Ability (the ability to discern true from false news headlines), according to the 20-item Misinformation Susceptibility Test (41). See also Table S54. Figure created using Jamovi ([www.jamovi.org](http://www.jamovi.org)).

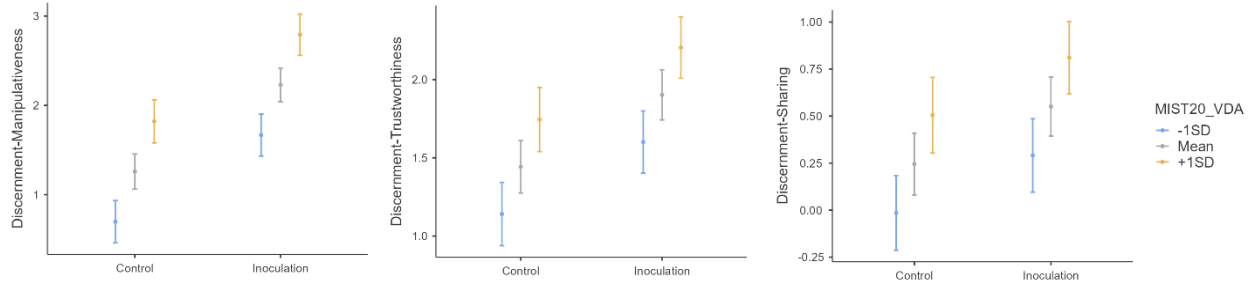

**Figure S7.**

**Studies 1-6: Examples of manipulative and neutral stimuli.**

| Study                    | Manipulative                                                                                                                                                                                                                                                                                        | Neutral                                                                                                                                                                                                                                                                                                                            |
|--------------------------|-----------------------------------------------------------------------------------------------------------------------------------------------------------------------------------------------------------------------------------------------------------------------------------------------------|------------------------------------------------------------------------------------------------------------------------------------------------------------------------------------------------------------------------------------------------------------------------------------------------------------------------------------|
| 1 & 6 Emotional language | <p>NEWS ALERT: Baby formula linked to horrific outbreak of new, terrifying disease among helpless infants. Parents despair.<br/> <a href="http://www.">http://www.</a></p> <p>"If we are silent, we lose our children": The moms fighting gun violence</p>                                          | <p>Infants who receive formula feedings may be at slightly higher risk of acute otitis media (ear infections).<br/> <a href="http://bit.ly/">http://bit.ly/</a></p> <p>Why mothers are leading the fight for gun safety.</p>                                                                                                       |
| 2 Incoherence            | <p>You don't know what you're talking about. Even though science is yet to show a correlation, it's very clear that violent video games like make people more likely to commit crimes.</p> <p>Your beliefs leave me completely unfazed, but by God your vapid ideas make me angry.</p>              | <p>You don't know what you're talking about. Science is yet to show a correlation between violent video games like and criminal behavior.</p> <p>Your beliefs leave me completely unfazed. It's your face that makes me angry.</p>                                                                                                 |
| 3 False dichotomies      | <p>Improving salaries for workers means businesses will go bankrupt. The choice is between small businesses and workers. It's simple mathematics.</p> <p>Having trouble staying awake at work? Coffee only keeps you awake for 45 minutes, energy lasts up to 4 hours. You know what to choose.</p> | <p>Improving salaries for workers may affect businesses' bottom line, study says. What's less clear is how much small vs large businesses are impacted.</p> <p>Having trouble staying awake at work? Drinking coffee keeps you awake for about 45 minutes, but certain healthy snacks can provide an even longer energy boost.</p> |
| 4 Scapegoating           | <p>Well, it's pretty obvious people of your ideology are incapable of being fiscally responsible. So yeah, the deficit and the fact that we can't pay for support for our vets IS your fault.</p>                                                                                                   | <p>Your party takes pride in being the party of "fiscal responsibility" but doesn't have a lot to show for it. What about the deficit, and what do we do about veterans' support?</p>                                                                                                                                              |

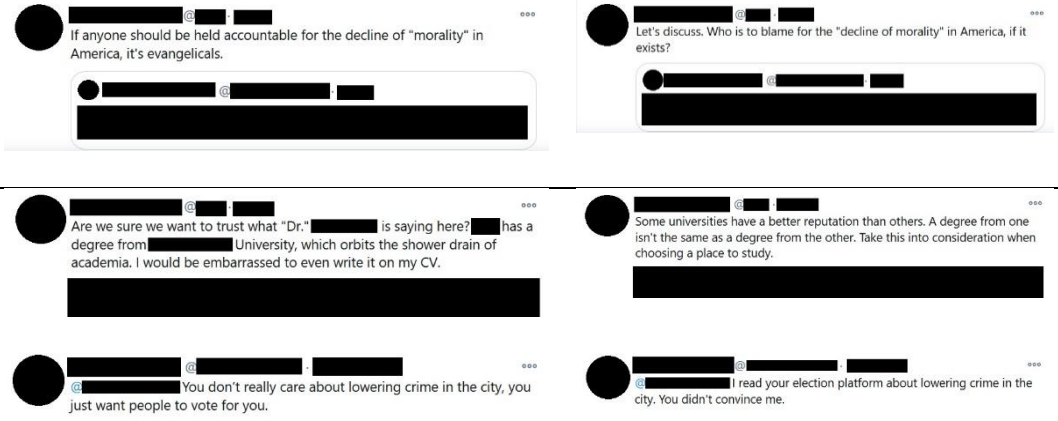

**Figure S8.**

Study 7: Examples of manipulative stimuli as they were implemented on YouTube (left: emotional language, right: false dichotomy).

|                                                                                                                                                                                                                                                                                                                                                                         |                                                                                                                                                                                                                                                                                                                                        |
|-------------------------------------------------------------------------------------------------------------------------------------------------------------------------------------------------------------------------------------------------------------------------------------------------------------------------------------------------------------------------|----------------------------------------------------------------------------------------------------------------------------------------------------------------------------------------------------------------------------------------------------------------------------------------------------------------------------------------|
| <p>Evaluate this sentence: <i>"Baby formula linked to outbreak of new, terrifying disease among helpless infants – parents despair."</i></p> <p style="text-align: center;">This sentence contains:</p> <ul style="list-style-type: none"> <li>a. A Command</li> <li>b. <b>Emotional Language</b></li> <li>c. False Dichotomy</li> <li>d. None of the others</li> </ul> | <p>Evaluate this sentence: <i>"People are either part of the solution, or they are part of the problem."</i></p> <p style="text-align: center;">This sentence contains:</p> <ul style="list-style-type: none"> <li>e. A Command</li> <li>f. Fearmongering</li> <li>g. <b>False Dichotomy</b></li> <li>h. None of the others</li> </ul> |
|-------------------------------------------------------------------------------------------------------------------------------------------------------------------------------------------------------------------------------------------------------------------------------------------------------------------------------------------------------------------------|----------------------------------------------------------------------------------------------------------------------------------------------------------------------------------------------------------------------------------------------------------------------------------------------------------------------------------------|

## Supplementary Tables

**Table S1a.**  
Sample composition for Studies 1-6 (demographics).

| Variable                                              | 1 Emo. language |        | 2 Incoherence |        | 3 False dichotomies |        | 4 Scapegoating |        | 5 Ad hominem |        | 6 Emo. language |        |
|-------------------------------------------------------|-----------------|--------|---------------|--------|---------------------|--------|----------------|--------|--------------|--------|-----------------|--------|
|                                                       | <i>N</i>        | %      | <i>N</i>      | %      | <i>N</i>            | %      | <i>N</i>       | %      | <i>N</i>     | %      | <i>N</i>        | %      |
| <b>Gender</b>                                         |                 |        |               |        |                     |        |                |        |              |        |                 |        |
| Female                                                | 547             | 51.0 % | 542           | 49.9 % | 556                 | 50.8 % | 539            | 49.9 % | 538          | 49.7 % | 540             | 50.7 % |
| Male                                                  | 509             | 47.5 % | 531           | 48.9 % | 531                 | 48.5 % | 525            | 48.6 % | 528          | 48.8 % | 510             | 47.8 % |
| Non-binary                                            | 12              | 1.1 %  | 11            | 1.0 %  | 7                   | 0.6 %  | 12             | 1.1 %  | 11           | 1.0 %  | 13              | 1.2 %  |
| Other                                                 | 2               | 0.2 %  | 1             | 0.1 %  | 0                   | 0      | 3              | 0.3 %  | 4            | 0.4 %  | 2               | 0.2 %  |
| Prefer not to say                                     | 2               | 0.2 %  | 1             | 0.1 %  | 1                   | 0.1 %  | 1              | 0.1 %  | 2            | 0.2 %  | 1               | 0.1 %  |
| <b>Age</b>                                            |                 |        |               |        |                     |        |                |        |              |        |                 |        |
| 18-24                                                 | 163             | 15.2 % | 128           | 11.8 % | 106                 | 9.7 %  | 132            | 12.2 % | 172          | 15.9 % | 114             | 10.8 % |
| 25-34                                                 | 231             | 21.5 % | 209           | 19.2 % | 250                 | 22.8 % | 255            | 23.6 % | 323          | 29.8 % | 225             | 21.1 % |
| 35-44                                                 | 195             | 18.2 % | 192           | 17.7 % | 178                 | 16.3 % | 212            | 19.6 % | 244          | 22.5 % | 190             | 17.8 % |
| 45-54                                                 | 158             | 14.7 % | 178           | 16.4 % | 186                 | 17.0 % | 181            | 16.8 % | 204          | 18.8 % | 162             | 15.2 % |
| 55 or older                                           | 325             | 30.3 % | 379           | 34.9 % | 375                 | 34.2 % | 300            | 27.8 % | 140          | 12.9 % | 374             | 35.1 % |
| <b>Education</b>                                      |                 |        |               |        |                     |        |                |        |              |        |                 |        |
| No formal education above age 16                      | 14              | 1.3 %  | 6             | 0.6 %  | 6                   | 0.5 %  | 7              | 0.6 %  | 4            | 0.4 %  | 8               | 0.8 %  |
| Professional or technical qualifications above age 16 | 28              | 2.6 %  | 33            | 3.0 %  | 31                  | 2.8 %  | 30             | 2.8 %  | 26           | 2.4 %  | 25              | 2.3 %  |
| School education up to age 18                         | 355             | 33.1 % | 332           | 30.6 % | 340                 | 31.1 % | 334            | 30.9 % | 335          | 30.9 % | 289             | 27.1 % |
| Degree (Bachelor's) or equivalent                     | 462             | 43.1 % | 472           | 43.5 % | 463                 | 42.3 % | 433            | 40.1 % | 457          | 42.2 % | 503             | 47.2 % |
| Degree (Master's) or other postgraduate qualification | 181             | 16.9 % | 206           | 19.0 % | 224                 | 20.5 % | 238            | 22.0 % | 215          | 19.9 % | 200             | 18.8 % |
| Doctorate                                             | 32              | 3.0 %  | 37            | 3.4 %  | 31                  | 2.8 %  | 38             | 3.5 %  | 46           | 4.2 %  | 41              | 3.8 %  |
| <b>How often do you check the news</b>                |                 |        |               |        |                     |        |                |        |              |        |                 |        |
| Never                                                 | 9               | 0.8 %  | 14            | 1.3 %  | 12                  | 1.1 %  | 4              | 0.4 %  | 13           | 1.2 %  | 11              | 1.0 %  |
| Rarely                                                | 85              | 7.9 %  | 67            | 6.2 %  | 80                  | 7.3 %  | 58             | 5.4 %  | 91           | 8.4 %  | 94              | 8.8 %  |
| Sometimes                                             | 261             | 24.3 % | 240           | 22.1 % | 269                 | 24.6 % | 262            | 24.3 % | 281          | 25.9 % | 264             | 24.8 % |
| Frequently                                            | 508             | 47.4 % | 527           | 48.5 % | 492                 | 44.9 % | 511            | 47.3 % | 477          | 44.0 % | 474             | 44.5 % |
| All the time                                          | 209             | 19.5 % | 238           | 21.9 % | 242                 | 22.1 % | 245            | 22.7 % | 221          | 20.4 % | 222             | 20.8 % |
| <b>How often do you use social media</b>              |                 |        |               |        |                     |        |                |        |              |        |                 |        |
| Never                                                 | 33              | 3.1 %  | 43            | 4.0 %  | 39                  | 3.6 %  | 42             | 3.9 %  | 21           | 1.9 %  | 41              | 3.8 %  |
| Rarely                                                | 66              | 6.2 %  | 71            | 6.5 %  | 88                  | 8.0 %  | 85             | 7.9 %  | 87           | 8.0 %  | 101             | 9.5 %  |
| Sometimes                                             | 190             | 17.7 % | 238           | 21.9 % | 221                 | 20.2 % | 219            | 20.3 % | 182          | 16.8 % | 191             | 17.9 % |
| Frequently                                            | 428             | 40.0 % | 435           | 40.1 % | 454                 | 41.5 % | 416            | 38.5 % | 429          | 39.6 % | 420             | 39.4 % |
| All the time                                          | 354             | 33.1 % | 299           | 27.5 % | 293                 | 26.8 % | 318            | 29.4 % | 364          | 33.6 % | 312             | 29.3 % |
| <b>Political party support</b>                        |                 |        |               |        |                     |        |                |        |              |        | <i>N</i>        | %      |
| Democratic Party                                      |                 |        |               |        |                     |        |                |        |              |        | 525             | 49.3 % |
| Republican Party                                      |                 |        |               |        |                     |        |                |        |              |        | 195             | 18.3 % |
| Independent                                           |                 |        |               |        |                     |        |                |        |              |        | 317             | 29.8 % |
| Other                                                 |                 |        |               |        |                     |        |                |        |              |        | 28              | 2.6 %  |

**Table S1b.**

Sample composition for Studies 1-6 (covariates/continuous variables).

| Variable                         | 1 Emo. lang |           | 2 Incoherence |           | 3 False dichot. |           | 4 Scapegoating |           | 5 Ad hominem |           | 6 Emo. lang. |           |
|----------------------------------|-------------|-----------|---------------|-----------|-----------------|-----------|----------------|-----------|--------------|-----------|--------------|-----------|
|                                  | <i>Mean</i> | <i>SD</i> | <i>Mean</i>   | <i>SD</i> | <i>Mean</i>     | <i>SD</i> | <i>Mean</i>    | <i>SD</i> | <i>Mean</i>  | <i>SD</i> | <i>Mean</i>  | <i>SD</i> |
| Political ideology (1-7)         | 3.37        | 1.79      | 3.35          | 1.74      | 3.38            | 1.77      | 3.32           | 1.77      | 3.25         | 1.71      | 3.26         | 1.73      |
| Populism (1-5)                   | 3.78        | 0.61      | 3.68          | 0.61      | 3.72            | 0.61      | 3.71           | 0.60      | 3.79         | 0.59      |              |           |
| Bullshit receptivity (1-5)       | 2.73        | 0.95      | 2.58          | 0.92      | 2.67            | 0.95      | 2.70           | 0.94      | 2.77         | 0.92      |              |           |
| Conspiracy belief (0-1)          | 0.63        | 0.21      | 0.59          | 0.23      | 0.59            | 0.23      | 0.60           | 0.22      | 0.62         | 0.21      |              |           |
| Analytical thinking (0-3)        | 1.32        | 1.23      | 1.14          | 0.97      | 1.19            | 0.97      | 1.19           | 0.98      | 1.12         | 0.96      |              |           |
| Numerical thinking (0-4)         | 2.96        | 1.04      | 2.99          | 0.99      | 3.03            | 0.97      | 2.99           | 0.99      | 3.07         | 1.01      |              |           |
| Act. open-minded thinking (0-10) |             |           |               |           |                 |           |                |           |              |           | 4.17         | 0.54      |
| MIST veracity discernment (0-1)  |             |           |               |           |                 |           |                |           |              |           | 0.83         | 0.15      |
| Personality (TIPI) (1-7)         |             |           |               |           |                 |           |                |           |              |           |              |           |
| Openness                         |             |           |               |           |                 |           |                |           |              |           | 5.21         | 1.23      |
| Conscientiousness                |             |           |               |           |                 |           |                |           |              |           | 5.64         | 1.22      |
| Extraversion                     |             |           |               |           |                 |           |                |           |              |           | 3.49         | 1.69      |
| Agreeableness                    |             |           |               |           |                 |           |                |           |              |           | 5.40         | 1.23      |
| Neuroticism (emo. stability)     |             |           |               |           |                 |           |                |           |              |           | 4.88         | 1.61      |

**Table S2.**

Pilot study (emotional language): independent samples and Bayesian *t*-tests for averaged scores for manipulativeness, confidence (manipulative/fake posts and control/neutral posts separately), credibility, and sharing. *Note:* Bayesian prior used is 0.707 (representing an 80% chance that the effect size is between -2 and 2).

| Variable                     |                            | Statistic | ±%       | df  | <i>p</i> | <i>M</i> <sub>diff</sub> | 95% CI        | Cohen's <i>d</i> | 95% CI       |
|------------------------------|----------------------------|-----------|----------|-----|----------|--------------------------|---------------|------------------|--------------|
| Discernment-Manipulativeness | Student's <i>t</i>         | -2.341    |          | 192 | 0.02     | -0.48                    | -0.88, -0.075 | -0.34            | -0.62, -0.05 |
|                              | Bayes factor <sub>10</sub> | 1.974     | 1.59E-08 |     |          |                          |               |                  |              |
| Fake-Confidence              | Student's <i>t</i>         | -2.075    |          | 192 | 0.039    | -0.33                    | -0.65, -0.02  | -0.30            | -0.58, -0.01 |
|                              | Bayes factor <sub>10</sub> | 1.151     | 2.30E-08 |     |          |                          |               |                  |              |
| Control-Confidence           | Student's <i>t</i>         | -0.161    |          | 192 | 0.872    | -0.028                   | -0.37, 0.31   | -0.02            | -0.31, 0.26  |
|                              | Bayes factor <sub>10</sub> | 0.158     | 5.84E-08 |     |          |                          |               |                  |              |
| Discernment-Credibility      | Student's <i>t</i>         | -0.0169   |          | 192 | 0.987    | -0.0029                  | -0.34, 0.33   | 0.00             | -0.28, 0.28  |
|                              | Bayes factor <sub>10</sub> | 0.156     | 5.86E-08 |     |          |                          |               |                  |              |
| Discernment-Sharing          | Student's <i>t</i>         | -1.358    |          | 192 | 0.176    | -0.19                    | -0.46, 0.08   | -0.20            | -0.48, 0.09  |
|                              | Bayes factor <sub>10</sub> | 0.369     | 4.33E-08 |     |          |                          |               |                  |              |

**Table S3.**

Study 1 (emotional language): technique recognition measure item-level results (independent samples and Bayesian *t*-tests). *Note:* Bayesian prior used is 0.707 (representing an 80% chance that the effect size is between -2 and 2). “-C-“ denotes a manipulative post’s matched neutral control.

| Manipulativeness              |                    | Statistic   | ±%       | df   | <i>p</i> | <i>M</i> <sub>diff</sub> | 95%CI        | Cohen's <i>d</i> | 95%CI        |
|-------------------------------|--------------------|-------------|----------|------|----------|--------------------------|--------------|------------------|--------------|
| Manipulative-Manipulativeness | Student's <i>t</i> | 9.2897      |          | 1069 | <.001    | 0.68                     | 0.53, 0.82   | 0.57             | 0.44, 0.69   |
|                               | BF <sub>10</sub>   | 4.59E+16    | 3.30E-22 |      |          |                          |              |                  |              |
| Neutral-Manipulativeness      | Student's <i>t</i> | -0.2205     |          | 1069 | 0.825    | -0.02                    | -0.16, 0.13  | -0.01            | -0.13, 0.11  |
|                               | BF <sub>10</sub>   | 0.0701      | 4.39e0-4 |      |          |                          |              |                  |              |
| Discernment-Manipulativeness  | Student's <i>t</i> | 7.9421      |          | 1068 | <.001    | 0.69                     | 0.52, 0.86   | 0.49             | 0.36, 0.61   |
|                               | BF <sub>10</sub>   | 9.82E+11    | 1.81E-17 |      |          |                          |              |                  |              |
| Abduction-Manipulativeness    | Student's <i>t</i> | 1.8014      |          | 527  | 0.072    | 0.30                     | -0.03, 0.63  | 0.16             | -0.01, 0.33  |
|                               | BF <sub>10</sub>   | 0.4676      | 7.99e0-7 |      |          |                          |              |                  |              |
| Abduction-C-Manipulativeness  | Student's <i>t</i> | -1.8126     |          | 541  | 0.07     | -0.25                    | -0.53, 0.02  | -0.16            | -0.32, 0.01  |
|                               | BF <sub>10</sub>   | 0.4713      | 1.03e0-6 |      |          |                          |              |                  |              |
| Airline-Manipulativeness      | Student's <i>t</i> | 8.0943      |          | 531  | <.001    | 1.23                     | 0.93, 1.52   | 0.70             | 0.52, 0.88   |
|                               | BF <sub>10</sub>   | 1.37E+12    | 7.00E-20 |      |          |                          |              |                  |              |
| Airline-C-Manipulativeness    | Student's <i>t</i> | 0.8805      |          | 537  | 0.379    | 0.14                     | -0.17, 0.44  | 0.08             | -0.09, 0.24  |
|                               | BF <sub>10</sub>   | 0.1398      | 3.43e0-6 |      |          |                          |              |                  |              |
| Gun2a-Manipulativeness        | Student's <i>t</i> | 4.033       |          | 533  | <.001    | 0.60                     | 0.31, 0.89   | 0.35             | 0.18, 0.52   |
|                               | BF <sub>10</sub>   | 239.5645    | 1.25e0-9 |      |          |                          |              |                  |              |
| Gun2a-C-Manipulativeness      | Student's <i>t</i> | -1.8492     |          | 535  | 0.065    | -0.28                    | -0.57, 0.02  | -0.16            | -0.33, 0.01  |
|                               | BF <sub>10</sub>   | 0.5066      | 8.18e0-7 |      |          |                          |              |                  |              |
| Immigration-Manipulativeness  | Student's <i>t</i> | -1.4509     |          | 534  | 0.147    | -0.23                    | -0.53, 0.08  | -0.13            | -0.30, 0.04  |
|                               | BF <sub>10</sub>   | 0.2678      | 1.61e0-6 |      |          |                          |              |                  |              |
| Immigr-C-Manipulativeness     | Student's <i>t</i> | 0.5145      |          | 534  | 0.607    | 0.08                     | -0.22, 0.37  | 0.04             | -0.13, 0.21  |
|                               | BF <sub>10</sub>   | 0.1097      | 3.99e0-6 |      |          |                          |              |                  |              |
| Suicide-Manipulativeness      | Student's <i>t</i> | 7.7556      |          | 531  | <.001    | 1.02                     | 0.76, 1.28   | 0.67             | 0.49, 0.85   |
|                               | BF <sub>10</sub>   | 1.29E+11    | 8.53E-19 |      |          |                          |              |                  |              |
| Suicide-C-Manipulativeness    | Student's <i>t</i> | 0.0305      |          | 537  | 0.976    | 0.00                     | -0.30, 0.30  | 0.00             | -0.17, 0.17  |
|                               | BF <sub>10</sub>   | 0.0959      | 5.12e0-6 |      |          |                          |              |                  |              |
| Baby-Manipulativeness         | Student's <i>t</i> | 5.1962      |          | 533  | <.001    | 0.70                     | 0.43, 0.96   | 0.45             | 0.28, 0.62   |
|                               | BF <sub>10</sub>   | 37385.6246  | 6.49E-12 |      |          |                          |              |                  |              |
| Baby-C-Manipulativeness       | Student's <i>t</i> | -3.1298     |          | 535  | 0.002    | -0.46                    | -0.76, -0.17 | -0.27            | -0.44, -0.10 |
|                               | BF <sub>10</sub>   | 10.9215     | 3.42e0-8 |      |          |                          |              |                  |              |
| Elephant-Manipulativeness     | Student's <i>t</i> | 9.2423      |          | 537  | <.001    | 1.42                     | 1.12, 1.72   | 0.80             | 0.61, 0.98   |
|                               | BF <sub>10</sub>   | 7.60E+15    | 1.02E-23 |      |          |                          |              |                  |              |
| Elephant-C-Manipulativeness   | Student's <i>t</i> | 2.3871      |          | 531  | 0.017    | 0.35                     | 0.06, 0.64   | 0.21             | 0.04, 0.38   |
|                               | BF <sub>10</sub>   | 1.5275      | 2.42e0-7 |      |          |                          |              |                  |              |
| Health-Manipulativeness       | Student's <i>t</i> | 5.8033      |          | 531  | <.001    | 0.84                     | 0.55, 1.12   | 0.50             | 0.33, 0.68   |
|                               | BF <sub>10</sub>   | 827141.6117 | 2.40E-13 |      |          |                          |              |                  |              |
| Health-C-Manipulativeness     | Student's <i>t</i> | -0.5035     |          | 537  | 0.615    | -0.08                    | -0.38, 0.22  | -0.04            | -0.21, 0.13  |
|                               | BF <sub>10</sub>   | 0.1086      | 4.42e0-6 |      |          |                          |              |                  |              |
| Phone-Manipulativeness        | Student's <i>t</i> | 2.4336      |          | 532  | 0.015    | 0.40                     | 0.08, 0.73   | 0.21             | 0.04, 0.38   |
|                               | BF <sub>10</sub>   | 1.6991      | 2.26e0-7 |      |          |                          |              |                  |              |
| Phone-C-Manipulativeness      | Student's <i>t</i> | 1.4221      |          | 536  | 0.156    | 0.22                     | -0.09, 0.53  | 0.12             | -0.05, 0.29  |
|                               | BF <sub>10</sub>   | 0.2565      | 1.80e0-6 |      |          |                          |              |                  |              |
| Suppl-Manipulativeness        | Student's <i>t</i> | 3.8452      |          | 532  | <.001    | 0.48                     | 0.23, 0.73   | 0.33             | 0.16, 0.51   |
|                               | BF <sub>10</sub>   | 118.7088    | 2.50e0-9 |      |          |                          |              |                  |              |
| Suppl-C-Manipulativeness      | Student's <i>t</i> | 1.0095      |          | 536  | 0.313    | 0.16                     | -0.15, 0.46  | 0.09             | -0.08, 0.26  |
|                               | BF <sub>10</sub>   | 0.1576      | 2.96e0-6 |      |          |                          |              |                  |              |

<sup>a</sup> Levene's test is significant (*p* < .05), suggesting a violation of the assumption of equal variances



**Table S4.**

Study 1 (emotional language): confidence measure item-level results (independent samples and Bayesian  $t$ -tests). *Note:* Bayesian prior used is 0.707 (representing an 80% chance that the effect size is between -2 and 2). “-C-“ denotes a manipulative post’s matched neutral control.

| Confidence              |                  | Statistic | ±%       | df   | $p$    | $M_{diff}$ | 95%CI       | Cohen's $d$ | 95%CI       |
|-------------------------|------------------|-----------|----------|------|--------|------------|-------------|-------------|-------------|
| Manipulative-Confidence | Student's $t$    | 8.1402    |          | 1069 | < .001 | 0.53       | 0.40, 0.66  | 0.50        | 0.37, 0.62  |
|                         | BF <sub>10</sub> | 4.35E+12  | 4.04E-18 |      |        |            |             |             |             |
| Neutral-Confidence      | Student's $t$    | 3.3833    |          | 1069 | < .001 | 0.22       | 0.09, 0.35  | 0.21        | 0.09, 0.33  |
|                         | BF <sub>10</sub> | 18.8684   | 1.46e0-6 |      |        |            |             |             |             |
| Discernment-Confidence  | Student's $t$    | 5.583     |          | 1068 | < .001 | 0.30       | 0.20, 0.41  | 0.34        | 0.22, 0.46  |
|                         | BF <sub>10</sub> | 266058.84 | 8.59E-11 |      |        |            |             |             |             |
| Abduction-Confidence    | Student's $t$    | 2.0473    |          | 527  | 0.041  | 0.28       | 0.01, 0.56  | 0.18        | 0.01, 0.35  |
|                         | BF <sub>10</sub> | 0.7393    | 4.92e0-7 |      |        |            |             |             |             |
| Abduction-C-Confidence  | Student's $t$    | 2.4558    |          | 541  | 0.014  | 0.30       | 0.06, 0.54  | 0.21        | 0.04, 0.38  |
|                         | BF <sub>10</sub> | 1.7779    | 2.57e0-7 |      |        |            |             |             |             |
| Airline-Confidence      | Student's $t$    | 5.6973    |          | 531  | < .001 | 0.67       | 0.44, 0.91  | 0.49        | 0.32, 0.67  |
|                         | BF <sub>10</sub> | 471090.10 | 4.36E-13 |      |        |            |             |             |             |
| Airline-C-Confidence    | Student's $t$    | 1.5429    |          | 537  | 0.123  | 0.20       | -0.05, 0.45 | 0.13        | -0.04, 0.30 |
|                         | BF <sub>10</sub> | 0.305     | 1.51e0-6 |      |        |            |             |             |             |
| Gun2a-Confidence        | Student's $t$    | 3.9849    |          | 533  | < .001 | 0.48       | 0.24, 0.71  | 0.34        | 0.17, 0.52  |
|                         | BF <sub>10</sub> | 199.4475  | 1.52e0-9 |      |        |            |             |             |             |
| Gun2a-C-Confidence      | Student's $t$    | 0.9657    |          | 535  | 0.335  | 0.12       | -0.12, 0.36 | 0.08        | -0.09, 0.25 |
|                         | BF <sub>10</sub> | 0.1515    | 2.92e0-6 |      |        |            |             |             |             |
| Immigration-Confidence  | Student's $t$    | 0.7445    |          | 534  | 0.457  | 0.09       | -0.15, 0.33 | 0.06        | -0.11, 0.23 |
|                         | BF <sub>10</sub> | 0.126     | 3.56e0-6 |      |        |            |             |             |             |
| Immigr-C-Confidence     | Student's $t$    | 0.0555    |          | 534  | 0.956  | 0.01       | -0.24, 0.26 | 0.00        | -0.17, 0.18 |
|                         | BF <sub>10</sub> | 0.0966    | 4.56e0-6 |      |        |            |             |             |             |
| Suicide-Confidence      | Student's $t$    | 7.7141    |          | 531  | < .001 | 0.92       | 0.69, 1.16  | 0.67        | 0.49, 0.85  |
|                         | BF <sub>10</sub> | 9.70E+10  | 1.15E-18 |      |        |            |             |             |             |
| Suicide-C-Confidence    | Student's $t$    | 1.7828    |          | 537  | 0.075  | 0.22       | -0.02, 0.46 | 0.15        | -0.02, 0.32 |
|                         | BF <sub>10</sub> | 0.4491    | 1.01e0-6 |      |        |            |             |             |             |
| Baby-Confidence         | Student's $t$    | 5.7898    |          | 533  | < .001 | 0.69       | 0.46, 0.93  | 0.50        | 0.33, 0.68  |
|                         | BF <sub>10</sub> | 770621.43 | 2.74E-13 |      |        |            |             |             |             |
| Baby-C-Confidence       | Student's $t$    | 2.473     |          | 535  | 0.014  | 0.32       | 0.07, 0.57  | 0.21        | 0.04, 0.38  |
|                         | BF <sub>10</sub> | 1.8607    | 2.19e0-7 |      |        |            |             |             |             |
| Elephant-Confidence     | Student's $t$    | 6.3991    |          | 537  | < .001 | 0.78       | 0.54, 1.03  | 0.55        | 0.38, 0.73  |
|                         | BF <sub>10</sub> | 2.34e0+7  | 8.77E-15 |      |        |            |             |             |             |
| Elephant-C-Confidence   | Student's $t$    | 1.7567    |          | 531  | 0.08   | 0.24       | -0.03, 0.50 | 0.15        | -0.02, 0.32 |
|                         | BF <sub>10</sub> | 0.432     | 9.18e0-7 |      |        |            |             |             |             |
| Health-Confidence       | Student's $t$    | 4.6828    |          | 531  | < .001 | 0.59       | 0.34, 0.84  | 0.41        | 0.23, 0.58  |
|                         | BF <sub>10</sub> | 3477.1565 | 7.39E-11 |      |        |            |             |             |             |
| Health-C-Confidence     | Student's $t$    | 3.4974    |          | 537  | < .001 | 0.42       | 0.18, 0.65  | 0.30        | 0.13, 0.47  |
|                         | BF <sub>10</sub> | 35.0431   | 1.02e0-8 |      |        |            |             |             |             |
| Phone-Confidence        | Student's $t$    | 2.2503    |          | 532  | 0.025  | 0.30       | 0.04, 0.56  | 0.19        | 0.02, 0.37  |
|                         | BF <sub>10</sub> | 1.1226    | 3.50e0-7 |      |        |            |             |             |             |
| Phone-C-Confidence      | Student's $t$    | 1.6813    |          | 536  | 0.093  | 0.21       | -0.04, 0.45 | 0.14        | -0.02, 0.31 |
|                         | BF <sub>10</sub> | 0.3789    | 1.19e0-6 |      |        |            |             |             |             |
| Suppl-Confidence        | Student's $t$    | 3.9763    |          | 532  | < .001 | 0.47       | 0.24, 0.70  | 0.34        | 0.17, 0.52  |
|                         | BF <sub>10</sub> | 193.289   | 1.50e0-9 |      |        |            |             |             |             |
| Suppl-C-Confidence      | Student's $t$    | 2.3224    |          | 536  | 0.021  | 0.29       | 0.04, 0.54  | 0.20        | 0.03, 0.37  |
|                         | BF <sub>10</sub> | 1.3128    | 3.18e0-7 |      |        |            |             |             |             |

<sup>a</sup> Levene's test is significant ( $p < .05$ ), suggesting a violation of the assumption of equal variances

**Table S5.**

Study 1 (emotional language): trustworthiness measure item-level results (independent samples and Bayesian *t*-tests). *Note:* Bayesian prior used is 0.707 (representing an 80% chance that the effect size is between -2 and 2). “-C-“ denotes a manipulative post’s matched neutral control.

| Trustworthiness              |                    | Statistic | ±%       | df   | <i>p</i> | <i>M</i> <sub>diff</sub> | 95%CI        | Cohen's <i>d</i> | 95%CI        |
|------------------------------|--------------------|-----------|----------|------|----------|--------------------------|--------------|------------------|--------------|
| Manipulative-Trustworthiness | Student's <i>t</i> | -0.474    |          | 1069 | 0.636    | -0.03                    | -0.17, 0.10  | -0.03            | -0.15, 0.09  |
|                              | BF <sub>10</sub>   | 0.0765    | 4.01E-04 |      |          |                          | 0.00, 0.00   |                  |              |
| Neutral-Trustworthiness      | Student's <i>t</i> | 4.156     |          | 1069 | < .001   | 0.26                     | 0.14, 0.38   | 0.25             | 0.13, 0.37   |
|                              | BF <sub>10</sub>   | 321.9585  | 8.10E-08 |      |          |                          | 0.00, 0.00   |                  |              |
| Discernment-Trustworthiness  | Student's <i>t</i> | 4.051     |          | 1068 | < .001   | 0.29                     | 0.15, 0.43   | 0.25             | 0.13, 0.37   |
|                              | BF <sub>10</sub>   | 212.0718  | 1.23E-07 |      |          |                          | 0.00, 0.00   |                  |              |
| Abduction-Trustworthiness    | Student's <i>t</i> | 2         |          | 527  | 0.046    | 0.31                     | 0.01, 0.61   | 0.17             | 0.00, 0.34   |
|                              | BF <sub>10</sub>   | 0.674     | 5.43E-07 |      |          |                          | 0.00, 0.00   |                  |              |
| Abduction-C-Trustworthiness  | Student's <i>t</i> | 2.705     |          | 541  | 0.007    | 0.33                     | 0.09, 0.57   | 0.23             | 0.06, 0.40   |
|                              | BF <sub>10</sub>   | 3.3061    | 1.34E-07 |      |          |                          | 0.00, 0.00   |                  |              |
| Airline-Trustworthiness      | Student's <i>t</i> | -2.014    |          | 531  | 0.045    | -0.26                    | -0.52, -0.01 | -0.17            | -0.34, 0.00  |
|                              | BF <sub>10</sub>   | 0.6896    | 5.77E-07 |      |          |                          | 0.00, 0.00   |                  |              |
| Airline-C-Trustworthiness    | Student's <i>t</i> | 1.649     |          | 537  | 0.1      | 0.21                     | -0.04, 0.45  | 0.14             | -0.03, 0.31  |
|                              | BF <sub>10</sub>   | 0.3593    | 1.27E-06 |      |          |                          | 0.00, 0.00   |                  |              |
| Gun2a-Trustworthiness        | Student's <i>t</i> | -1.765    |          | 533  | 0.078    | -0.27                    | -0.57, 0.03  | -0.15            | -0.32, 0.02  |
|                              | BF <sub>10</sub>   | 0.4369    | 9.50E-07 |      |          |                          | 0.00, 0.00   |                  |              |
| Gun2a-C-Trustworthiness      | Student's <i>t</i> | 0.853     |          | 535  | 0.394    | 0.11                     | -0.14, 0.35  | 0.07             | -0.10, 0.24  |
|                              | BF <sub>10</sub>   | 0.1371    | 3.25E-06 |      |          |                          | 0.00, 0.00   |                  |              |
| Immigration-Trustworthiness  | Student's <i>t</i> | 2.119     |          | 534  | 0.035    | 0.33                     | 0.02, 0.64   | 0.18             | 0.01, 0.35   |
|                              | BF <sub>10</sub>   | 0.8505    | 4.75E-07 |      |          |                          | 0.00, 0.00   |                  |              |
| Immigr-C-Trustworthiness     | Student's <i>t</i> | 1.559     |          | 534  | 0.12     | 0.20                     | -0.05, 0.45  | 0.14             | -0.04, 0.31  |
|                              | BF <sub>10</sub>   | 0.314     | 1.31E-06 |      |          |                          | 0.00, 0.00   |                  |              |
| Suicide-Trustworthiness      | Student's <i>t</i> | -1.268    |          | 531  | 0.205    | -0.17                    | -0.44, 0.10  | -0.11            | -0.28, 0.06  |
|                              | BF <sub>10</sub>   | 0.2107    | 2.02E-06 |      |          |                          | 0.00, 0.00   |                  |              |
| Suicide-C-Trustworthiness    | Student's <i>t</i> | 1.429     |          | 537  | 0.154    | 0.19                     | -0.07, 0.44  | 0.12             | -0.05, 0.29  |
|                              | BF <sub>10</sub>   | 0.2589    | 1.80E-06 |      |          |                          | 0.00, 0.00   |                  |              |
| Baby-Trustworthiness         | Student's <i>t</i> | -0.868    |          | 533  | 0.386    | -0.13                    | -0.41, 0.16  | -0.08            | -0.24, 0.09  |
|                              | BF <sub>10</sub>   | 0.1389    | 3.24E-06 |      |          |                          | 0.00, 0.00   |                  |              |
| Baby-C-Trustworthiness       | Student's <i>t</i> | 4.068     |          | 535  | < .001   | 0.53                     | 0.27, 0.78   | 0.35             | 0.18, 0.52   |
|                              | BF <sub>10</sub>   | 273.339   | 1.17E-09 |      |          |                          | 0.00, 0.00   |                  |              |
| Elephant-Trustworthiness     | Student's <i>t</i> | -2.431    |          | 537  | 0.015    | -0.33                    | -0.60, -0.06 | -0.21            | -0.38, -0.04 |
|                              | BF <sub>10</sub>   | 1.6821    | 2.51E-07 |      |          |                          | 0.00, 0.00   |                  |              |
| Elephant-C-Trustworthiness   | Student's <i>t</i> | 1.938     |          | 531  | 0.053    | 0.25                     | 0.00, 0.51   | 0.17             | 0.00, 0.34   |
|                              | BF <sub>10</sub>   | 0.598     | 6.51E-07 |      |          |                          | 0.00, 0.00   |                  |              |
| Health-Trustworthiness       | Student's <i>t</i> | -1.699    |          | 531  | 0.09     | -0.23                    | -0.49, 0.04  | -0.15            | -0.32, 0.02  |
|                              | BF <sub>10</sub>   | 0.3919    | 1.04E-06 |      |          |                          | 0.00, 0.00   |                  |              |
| Health-C-Trustworthiness     | Student's <i>t</i> | 4.273     |          | 537  | < .001   | 0.53                     | 0.28, 0.77   | 0.37             | 0.20, 0.54   |
|                              | BF <sub>10</sub>   | 614.1642  | 5.12E-10 |      |          |                          | 0.00, 0.00   |                  |              |
| Phone-Trustworthiness        | Student's <i>t</i> | 0.742     |          | 532  | 0.459    | 0.11                     | -0.17, 0.39  | 0.06             | -0.11, 0.23  |
|                              | BF <sub>10</sub>   | 0.1259    | 3.52E-06 |      |          |                          | 0.00, 0.00   |                  |              |
| Phone-C-Trustworthiness      | Student's <i>t</i> | 1.545     |          | 536  | 0.123    | 0.20                     | -0.05, 0.45  | 0.13             | -0.04, 0.30  |
|                              | BF <sub>10</sub>   | 0.3062    | 1.49E-06 |      |          |                          | 0.00, 0.00   |                  |              |
| Suppl-Trustworthiness        | Student's <i>t</i> | 0.158     |          | 532  | 0.875    | 0.02                     | -0.25, 0.29  | 0.01             | -0.16, 0.18  |
|                              | BF <sub>10</sub>   | 0.0976    | 4.46E-06 |      |          |                          | 0.00, 0.00   |                  |              |
| Suppl-C-Trustworthiness      | Student's <i>t</i> | 1.321     |          | 536  | 0.187    | 0.18                     | -0.09, 0.45  | 0.11             | -0.06, 0.28  |
|                              | BF <sub>10</sub>   | 0.2244    | 2.04E-06 |      |          |                          |              |                  |              |

<sup>a</sup> Levene's test is significant ( $p < .05$ ), suggesting a violation of the assumption of equal variances

**Table S6.**

Study 1 (emotional language): sharing intentions measure item-level results (independent samples and Bayesian *t*-tests). *Note:* Bayesian prior used is 0.707 (representing an 80% chance that the effect size is between -2 and 2). “-C-“ denotes a manipulative post’s matched neutral control.

| Sharing              |                    | Statistic | ±%       | df   | <i>p</i> | <i>M<sub>diff</sub></i> | 95% CI      | Cohen's <i>d</i> | 95%CI       |
|----------------------|--------------------|-----------|----------|------|----------|-------------------------|-------------|------------------|-------------|
| Manipulative-Sharing | Student's <i>t</i> | -0.24     |          | 1069 | 0.81     | -0.02                   | -0.20, 0.15 | -0.01            | -0.13, 0.11 |
|                      | BF <sub>10</sub>   | 0.0704    | 4.37E-04 |      |          |                         |             |                  |             |
| Neutral-Sharing      | Student's <i>t</i> | 2.209     |          | 1069 | 0.027    | 0.21                    | 0.02, 0.39  | 0.14             | 0.01, 0.26  |
|                      | BF <sub>10</sub>   | 0.7568    | 3.87E-05 |      |          |                         |             |                  |             |
| Discernment-Sharing  | Student's <i>t</i> | 3.496     |          | 1068 | < .001   | 0.23                    | 0.10, 0.36  | 0.21             | 0.09, 0.33  |
|                      | BF <sub>10</sub>   | 27.5131   | 9.83E-07 |      |          |                         |             |                  |             |
| Abduction-Sharing    | Student's <i>t</i> | 2.742     |          | 527  | 0.006    | 0.47                    | 0.13, 0.81  | 0.24             | 0.07, 0.41  |
|                      | BF <sub>10</sub>   | 3.683     | 9.01E-08 |      |          |                         |             |                  |             |
| Abduction-C-Sharing  | Student's <i>t</i> | -0.4      |          | 541  | 0.689    | -0.07                   | -0.39, 0.26 | -0.03            | -0.20, 0.13 |
|                      | BF <sub>10</sub>   | 0.1032    | 5.09E-06 |      |          |                         |             |                  |             |
| Airline-Sharing      | Student's <i>t</i> | -1.748    |          | 531  | 0.081    | -0.28                   | -0.59, 0.03 | -0.15            | -0.32, 0.02 |
|                      | BF <sub>10</sub>   | 0.4249    | 9.62E-07 |      |          |                         |             |                  |             |
| Airline-C-Sharing    | Student's <i>t</i> | -0.259    |          | 537  | 0.796    | -0.04                   | -0.37, 0.28 | -0.02            | -0.19, 0.15 |
|                      | BF <sub>10</sub>   | 0.0991    | 4.94E-06 |      |          |                         |             |                  |             |
| Gun2a-Sharing        | Student's <i>t</i> | -0.151    |          | 533  | 0.88     | -0.02                   | -0.33, 0.28 | -0.01            | -0.18, 0.16 |
|                      | BF <sub>10</sub>   | 0.0974    | 4.64E-06 |      |          |                         |             |                  |             |
| Gun2a-C-Sharing      | Student's <i>t</i> | 0.6       |          | 535  | 0.549    | 0.10                    | -0.23, 0.43 | 0.05             | -0.12, 0.22 |
|                      | BF <sub>10</sub>   | 0.1147    | 3.93E-06 |      |          |                         |             |                  |             |
| Immigration-Sharing  | Student's <i>t</i> | 0.19      |          | 534  | 0.85     | 0.03                    | -0.30, 0.37 | 0.02             | -0.15, 0.19 |
|                      | BF <sub>10</sub>   | 0.0979    | 4.65E-06 |      |          |                         |             |                  |             |
| Immigr-C-Sharing     | Student's <i>t</i> | 1.586     |          | 534  | 0.113    | 0.25                    | -0.06, 0.57 | 0.14             | -0.03, 0.31 |
|                      | BF <sub>10</sub>   | 0.3271    | 1.26E-06 |      |          |                         |             |                  |             |
| Suicide-Sharing      | Student's <i>t</i> | -0.279    |          | 531  | 0.78     | -0.04                   | -0.34, 0.26 | -0.02            | -0.19, 0.15 |
|                      | BF <sub>10</sub>   | 0.1001    | 4.44E-06 |      |          |                         |             |                  |             |
| Suicide-C-Sharing    | Student's <i>t</i> | -0.267    |          | 537  | 0.79     | -0.04                   | -0.33, 0.25 | -0.02            | -0.19, 0.15 |
|                      | BF <sub>10</sub>   | 0.0993    | 4.94E-06 |      |          |                         |             |                  |             |
| Baby-Sharing         | Student's <i>t</i> | -0.588    |          | 533  | 0.557    | -0.09                   | -0.41, 0.22 | -0.05            | -0.22, 0.12 |
|                      | BF <sub>10</sub>   | 0.1138    | 3.99E-06 |      |          |                         |             |                  |             |
| Baby-C-Sharing       | Student's <i>t</i> | 3.26      |          | 535  | 0.001    | 0.53                    | 0.21, 0.85  | 0.28             | 0.11, 0.45  |
|                      | BF <sub>10</sub>   | 16.2521   | 2.25E-08 |      |          |                         |             |                  |             |
| Elephant-Sharing     | Student's <i>t</i> | -1.297    |          | 537  | 0.195    | -0.21                   | -0.52, 0.11 | -0.11            | -0.28, 0.06 |
|                      | BF <sub>10</sub>   | 0.2172    | 2.16E-06 |      |          |                         |             |                  |             |
| Elephant-C-Sharing   | Student's <i>t</i> | 1.42      |          | 531  | 0.156    | 0.24                    | -0.09, 0.58 | 0.12             | -0.05, 0.29 |
|                      | BF <sub>10</sub>   | 0.2571    | 1.59E-06 |      |          |                         |             |                  |             |
| Health-Sharing       | Student's <i>t</i> | -1.088    |          | 531  | 0.277    | -0.17                   | -0.47, 0.13 | -0.09            | -0.26, 0.08 |
|                      | BF <sub>10</sub>   | 0.1714    | 2.50E-06 |      |          |                         |             |                  |             |
| Health-C-Sharing     | Student's <i>t</i> | 2.41      |          | 537  | 0.016    | 0.39                    | 0.07, 0.70  | 0.21             | 0.04, 0.38  |
|                      | BF <sub>10</sub>   | 1.6024    | 2.60E-07 |      |          |                         |             |                  |             |
| Phone-Sharing        | Student's <i>t</i> | 0.8       |          | 532  | 0.424    | 0.14                    | -0.20, 0.49 | 0.07             | -0.10, 0.24 |
|                      | BF <sub>10</sub>   | 0.1315    | 3.36E-06 |      |          |                         |             |                  |             |
| Phone-C-Sharing      | Student's <i>t</i> | 1.447     |          | 536  | 0.149    | 0.25                    | -0.09, 0.58 | 0.12             | -0.04, 0.29 |
|                      | BF <sub>10</sub>   | 0.2654    | 1.73E-06 |      |          |                         |             |                  |             |
| Suppl-Sharing        | Student's <i>t</i> | 0.729     |          | 532  | 0.466    | 0.11                    | -0.19, 0.41 | 0.06             | -0.11, 0.23 |
|                      | BF <sub>10</sub>   | 0.125     | 3.44E-06 |      |          |                         |             |                  |             |
| Suppl-C-Sharing      | Student's <i>t</i> | 1.145     |          | 536  | 0.253    | 0.17                    | -0.12, 0.47 | 0.10             | -0.07, 0.27 |
|                      | BF <sub>10</sub>   | 0.1816    | 2.55E-06 |      |          |                         |             |                  |             |

<sup>a</sup> Levene's test is significant ( $p < .05$ ), suggesting a violation of the assumption of equal variances

**Table S7.**

Study 2 (incoherence): technique recognition measure item-level results (independent samples and Bayesian *t*-tests). *Note:* Bayesian prior used is 0.707 (representing an 80% chance that the effect size is between -2 and 2). “-C-“ denotes a manipulative post’s matched neutral control.

| Incoherence                |                    | Statistic  | ±%       | df   | <i>p</i> | <i>M</i> <sub>diff</sub> | 95%CI       | Cohen's <i>d</i> | 95%CI       |
|----------------------------|--------------------|------------|----------|------|----------|--------------------------|-------------|------------------|-------------|
| Manipulative-Incoherence   | Student's <i>t</i> | 17.89      |          | 1084 | <.001    | 1.44                     | 1.28, 1.60  | 1.09             | 0.95, 1.22  |
|                            | BF <sub>10</sub>   | 1.82E+59   | 1.63E-65 |      |          |                          |             |                  |             |
| Neutral-Incoherence        | Student's <i>t</i> | 7.08       |          | 1082 | <.001    | 0.52                     | 0.38, 0.67  | 0.43             | 0.31, 0.55  |
|                            | BF <sub>10</sub>   | 2.21e0+9   | 1.04E-14 |      |          |                          |             |                  |             |
| Discernment-Incoherence    | Student's <i>t</i> | 10.12      |          | 1082 | <.001    | 0.92                     | 0.74, 1.10  | 0.62             | 0.49, 0.74  |
|                            | BF <sub>10</sub>   | 7.57E+19   | 2.13E-25 |      |          |                          |             |                  |             |
| StockMarket-Incoherence    | Student's <i>t</i> | 11.13      |          | 543  | <.001    | 1.81                     | 1.49, 2.13  | 0.95             | 0.77, 1.14  |
|                            | BF <sub>10</sub>   | 6.33E+22   | 5.29E-31 |      |          |                          |             |                  |             |
| StockMarket-C-Incoherence  | Student's <i>t</i> | 7.84       |          | 539  | <.001    | 1.34                     | 1.00, 1.67  | 0.68             | 0.50, 0.85  |
|                            | BF <sub>10</sub>   | 2.28E+11   | 5.90E-19 |      |          |                          |             |                  |             |
| Morality-Incoherence       | Student's <i>t</i> | 8.72       |          | 543  | <.001    | 1.45                     | 1.12, 1.77  | 0.75             | 0.57, 0.93  |
|                            | BF <sub>10</sub>   | 1.45E+14   | 8.99E-22 |      |          |                          |             |                  |             |
| Morality-C-Incoherence     | Student's <i>t</i> | 7.29       |          | 539  | <.001    | 1.23                     | 0.90, 1.56  | 0.63             | 0.45, 0.80  |
|                            | BF <sub>10</sub>   | 5.78e0+9   | 3.03E-17 |      |          |                          |             |                  |             |
| TanningBeds-Incoherence    | Student's <i>t</i> | 3.93       |          | 543  | <.001    | 0.70                     | 0.35, 1.04  | 0.34             | 0.17, 0.51  |
|                            | BF <sub>10</sub>   | 162.627    | 2.34e0-9 |      |          |                          |             |                  |             |
| TanningBeds-C-Incoherence  | Student's <i>t</i> | 1.75       |          | 539  | 0.08     | 0.25                     | -0.03, 0.53 | 0.15             | -0.02, 0.32 |
|                            | BF <sub>10</sub>   | 0.427      | 1.10e0-6 |      |          |                          |             |                  |             |
| VideoGames-Incoherence     | Student's <i>t</i> | 9.2        |          | 542  | <.001    | 1.54                     | 1.21, 1.87  | 0.79             | 0.61, 0.97  |
|                            | BF <sub>10</sub>   | 5.67E+15   | 1.84E-23 |      |          |                          |             |                  |             |
| VideoGames-C-Incoherence   | Student's <i>t</i> | 3.2        |          | 540  | 0.001    | 0.51                     | 0.20, 0.82  | 0.28             | 0.10, 0.45  |
|                            | BF <sub>10</sub>   | 13.5       | 3.02e0-8 |      |          |                          |             |                  |             |
| TrueOrFalse-Incoherence    | Student's <i>t</i> | 7.24       |          | 540  | <.001    | 1.19                     | 0.86, 1.51  | 0.62             | 0.45, 0.80  |
|                            | BF <sub>10</sub>   | 4.24e0+9   | 4.31E-17 |      |          |                          |             |                  |             |
| TrueOrFalse-C-Incoherence  | Student's <i>t</i> | 2.9        |          | 542  | 0.004    | 0.51                     | 0.16, 0.85  | 0.25             | 0.08, 0.42  |
|                            | BF <sub>10</sub>   | 5.641      | 7.81e0-8 |      |          |                          |             |                  |             |
| Consensus-Incoherence      | Student's <i>t</i> | 6.9        |          | 542  | <.001    | 1.25                     | 0.90, 1.61  | 0.59             | 0.42, 0.77  |
|                            | BF <sub>10</sub>   | 4.79e0+8   | 4.41E-16 |      |          |                          |             |                  |             |
| Consensus-C-Incoherence    | Student's <i>t</i> | 5.52       |          | 540  | <.001    | 0.95                     | 0.61, 1.29  | 0.47             | 0.30, 0.65  |
|                            | BF <sub>10</sub>   | 186016.535 | 1.44E-12 |      |          |                          |             |                  |             |
| Predictions-Incoherence    | Student's <i>t</i> | 9.55       |          | 543  | <.001    | 1.64                     | 1.31, 1.98  | 0.82             | 0.64, 1.00  |
|                            | BF <sub>10</sub>   | 9.45E+16   | 1.00E-24 |      |          |                          |             |                  |             |
| Predictions-C-Incoherence  | Student's <i>t</i> | 1.01       |          | 539  | 0.313    | 0.15                     | -0.15, 0.45 | 0.09             | -0.08, 0.26 |
|                            | BF <sub>10</sub>   | 0.157      | 3.15e0-6 |      |          |                          |             |                  |             |
| Temperatures-Incoherence   | Student's <i>t</i> | 10.6       |          | 543  | <.001    | 1.81                     | 1.48, 2.15  | 0.91             | 0.72, 1.09  |
|                            | BF <sub>10</sub>   | 6.29E+20   | 8.70E-29 |      |          |                          |             |                  |             |
| Temperatures-C-Incoherence | Student's <i>t</i> | 3.86       |          | 539  | <.001    | 0.60                     | 0.29, 0.91  | 0.33             | 0.16, 0.50  |
|                            | BF <sub>10</sub>   | 125.02     | 2.87e0-9 |      |          |                          |             |                  |             |
| DataPrivacy-Incoherence    | Student's <i>t</i> | 10.56      |          | 541  | <.001    | 1.90                     | 1.54, 2.25  | 0.91             | 0.72, 1.09  |
|                            | BF <sub>10</sub>   | 4.11E+20   | 1.19E-28 |      |          |                          |             |                  |             |
| DataPrivacy-C-Incoherence  | Student's <i>t</i> | 1.37       |          | 541  | 0.172    | 0.23                     | -0.10, 0.57 | 0.12             | -0.05, 0.29 |
|                            | BF <sub>10</sub>   | 0.237      | 2.12e0-6 |      |          |                          |             |                  |             |
| Beliefs-Incoherence        | Student's <i>t</i> | 6.58       |          | 541  | <.001    | 1.07                     | 0.75, 1.38  | 0.57             | 0.39, 0.74  |
|                            | BF <sub>10</sub>   | 6.98e0+7   | 3.19E-15 |      |          |                          |             |                  |             |
| Beliefs-C-Incoherence      | Student's <i>t</i> | 1.01       |          | 541  | 0.314    | 0.18                     | -0.17, 0.54 | 0.09             | -0.08, 0.26 |
|                            | BF <sub>10</sub>   | 0.157      | 3.29e0-6 |      |          |                          |             |                  |             |

<sup>a</sup> Levene's test is significant ( $p < .05$ ), suggesting a violation of the assumption of equal variances

**Table S8.**

Study 2 (incoherence): confidence measure item-level results (independent samples and Bayesian *t*-tests). *Note:* Bayesian prior used is 0.707 (representing an 80% chance that the effect size is between -2 and 2). “-C-“ denotes a manipulative post’s matched neutral control.

| Confidence                |                    | Statistic | ±%       | df   | <i>p</i> | <i>M</i> <sub>diff</sub> | 95%CI        | Cohen's <i>d</i> | 95%CI        |
|---------------------------|--------------------|-----------|----------|------|----------|--------------------------|--------------|------------------|--------------|
| Manipulative-Confidence   | Student's <i>t</i> | 0.721     |          | 1084 | 0.471    | 0.05                     | -0.08, 0.18  | 0.04             | -0.08, 0.16  |
|                           | BF <sub>10</sub>   | 0.0879    | 3.99E-04 |      |          |                          |              |                  |              |
| Neutral-Confidence        | Student's <i>t</i> | -2.266    |          | 1082 | 0.024    | -0.15                    | -0.27, -0.02 | -0.14            | -0.26, -0.02 |
|                           | BF <sub>10</sub>   | 0.8515    | 3.88E-05 |      |          |                          |              |                  |              |
| Discernment-Confidence    | Student's <i>t</i> | 3.9       |          | 1082 | <.001    | 0.19                     | 0.10, 0.29   | 0.24             | 0.12, 0.36   |
|                           | BF <sub>10</sub>   | 117.5321  | 2.57E-07 |      |          |                          |              |                  |              |
| StockMarket-Confidence    | Student's <i>t</i> | 0.249     |          | 543  | 0.804    | 0.03                     | -0.22, 0.28  | 0.02             | -0.15, 0.19  |
|                           | BF <sub>10</sub>   | 0.0984    | 5.40E-06 |      |          |                          |              |                  |              |
| StockMarket-C-Confidence  | Student's <i>t</i> | -1.05     |          | 539  | 0.294    | -0.13                    | -0.38, 0.12  | -0.09            | -0.26, 0.08  |
|                           | BF <sub>10</sub>   | 0.164     | 2.88E-06 |      |          |                          |              |                  |              |
| Morality-Confidence       | Student's <i>t</i> | 1.972     |          | 543  | 0.049    | 0.24                     | 0.00, 0.48   | 0.17             | 0.00, 0.34   |
|                           | BF <sub>10</sub>   | 0.6305    | 7.86E-07 |      |          |                          |              |                  |              |
| Morality-C-Confidence     | Student's <i>t</i> | -0.423    |          | 539  | 0.672    | -0.05                    | -0.28, 0.18  | -0.04            | -0.20, 0.13  |
|                           | BF <sub>10</sub>   | 0.1044    | 4.87E-06 |      |          |                          |              |                  |              |
| TanningBeds-Confidence    | Student's <i>t</i> | -2.287    |          | 543  | 0.023    | -0.29                    | -0.54, -0.04 | -0.20            | -0.36, -0.03 |
|                           | BF <sub>10</sub>   | 1.2079    | 3.91E-07 |      |          |                          |              |                  |              |
| TanningBeds-C-Confidence  | Student's <i>t</i> | -2.201    |          | 539  | 0.028    | -0.29                    | -0.54, -0.03 | -0.19            | -0.36, -0.02 |
|                           | BF <sub>10</sub>   | 1.0039    | 4.48E-07 |      |          |                          |              |                  |              |
| VideoGames-Confidence     | Student's <i>t</i> | -0.312    |          | 542  | 0.755    | -0.04                    | -0.28, 0.20  | -0.03            | -0.19, 0.14  |
|                           | BF <sub>10</sub>   | 0.1001    | 5.34E-06 |      |          |                          |              |                  |              |
| VideoGames-C-Confidence   | Student's <i>t</i> | -1.643    |          | 540  | 0.101    | -0.21                    | -0.47, 0.04  | -0.14            | -0.31, 0.03  |
|                           | BF <sub>10</sub>   | 0.355     | 1.37E-06 |      |          |                          |              |                  |              |
| TrueOrFalse-Confidence    | Student's <i>t</i> | 3.9       |          | 540  | <.001    | 0.45                     | 0.22, 0.68   | 0.34             | 0.16, 0.51   |
|                           | BF <sub>10</sub>   | 144.3469  | 2.54E-09 |      |          |                          |              |                  |              |
| TrueOrFalse-C-Confidence  | Student's <i>t</i> | -2.977    |          | 542  | 0.003    | -0.37                    | -0.61, -0.13 | -0.26            | -0.42, -0.09 |
|                           | BF <sub>10</sub>   | 6.9478    | 6.28E-08 |      |          |                          |              |                  |              |
| Consensus-Confidence      | Student's <i>t</i> | -1.989    |          | 542  | 0.047    | -0.25                    | -0.50, 0.00  | -0.17            | -0.34, 0.00  |
|                           | BF <sub>10</sub>   | 0.6523    | 7.43E-07 |      |          |                          |              |                  |              |
| Consensus-C-Confidence    | Student's <i>t</i> | -0.243    |          | 540  | 0.808    | -0.03                    | -0.29, 0.23  | -0.02            | -0.19, 0.15  |
|                           | BF <sub>10</sub>   | 0.0985    | 5.18E-06 |      |          |                          |              |                  |              |
| Predictions-Confidence    | Student's <i>t</i> | 0.94      |          | 543  | 0.347    | 0.12                     | -0.13, 0.37  | 0.08             | -0.09, 0.25  |
|                           | BF <sub>10</sub>   | 0.1466    | 3.63E-06 |      |          |                          |              |                  |              |
| Predictions-C-Confidence  | Student's <i>t</i> | -0.719    |          | 539  | 0.472    | -0.09                    | -0.33, 0.15  | -0.06            | -0.23, 0.11  |
|                           | BF <sub>10</sub>   | 0.1231    | 4.07E-06 |      |          |                          |              |                  |              |
| Temperatures-Confidence   | Student's <i>t</i> | 0.736     |          | 543  | 0.462    | 0.09                     | -0.15, 0.34  | 0.06             | -0.11, 0.23  |
|                           | BF <sub>10</sub>   | 0.1241    | 4.33E-06 |      |          |                          |              |                  |              |
| Temperatures-C-Confidence | Student's <i>t</i> | -0.44     |          | 539  | 0.66     | -0.05                    | -0.30, 0.19  | -0.04            | -0.21, 0.13  |
|                           | BF <sub>10</sub>   | 0.1052    | 4.79E-06 |      |          |                          |              |                  |              |
| DataPrivacy-Confidence    | Student's <i>t</i> | 1.713     |          | 541  | 0.087    | 0.23                     | -0.03, 0.48  | 0.15             | -0.02, 0.32  |
|                           | BF <sub>10</sub>   | 0.3976    | 1.24E-06 |      |          |                          |              |                  |              |
| DataPrivacy-C-Confidence  | Student's <i>t</i> | -3.074    |          | 541  | 0.002    | -0.38                    | -0.63, -0.14 | -0.26            | -0.43, -0.09 |
|                           | BF <sub>10</sub>   | 9.2291    | 4.59E-08 |      |          |                          |              |                  |              |
| Beliefs-Confidence        | Student's <i>t</i> | 2.036     |          | 541  | 0.042    | 0.24                     | 0.01, 0.48   | 0.17             | 0.01, 0.34   |
|                           | BF <sub>10</sub>   | 0.7143    | 6.68E-07 |      |          |                          |              |                  |              |
| Beliefs-C-Confidence      | Student's <i>t</i> | -1.145    |          | 541  | 0.253    | -0.15                    | -0.40, 0.11  | -0.10            | -0.27, 0.07  |
|                           | BF <sub>10</sub>   | 0.1808    | 2.82E-06 |      |          |                          |              |                  |              |

<sup>a</sup> Levene's test is significant ( $p < .05$ ), suggesting a violation of the assumption of equal variances

**Table S9.**

Study 2 (incoherence): trustworthiness measure item-level results (independent samples and Bayesian *t*-tests). *Note:* Bayesian prior used is 0.707 (representing an 80% chance that the effect size is between -2 and 2). “-C-“ denotes a manipulative post’s matched neutral control.

| Trustworthiness                |                    | Statistic | ±%       | df   | <i>p</i> | <i>M</i> <sub>diff</sub> | 95%CI        | Cohen's <i>d</i> | 95%CI        |
|--------------------------------|--------------------|-----------|----------|------|----------|--------------------------|--------------|------------------|--------------|
| Manipulative-Trustworthiness   | Student's <i>t</i> | -4.724    |          | 1084 | <.001    | -0.33                    | -0.47, -0.19 | -0.29            | -0.41, -0.17 |
|                                | BF <sub>10</sub>   | 3712.974  | 7.83e0-9 |      |          |                          |              |                  |              |
| Neutral-Trustworthiness        | Student's <i>t</i> | -1.499    |          | 1082 | 0.134    | -0.10                    | -0.22, 0.03  | -0.09            | -0.21, 0.03  |
|                                | BF <sub>10</sub>   | 0.206     | 1.65e0-4 |      |          |                          |              |                  |              |
| Discernment-Trustworthiness    | Student's <i>t</i> | 3.11      |          | 1082 | 0.002    | 0.24                     | 0.09, 0.38   | 0.19             | 0.07, 0.31   |
|                                | BF <sub>10</sub>   | 7.876     | 4.03e0-6 |      |          |                          |              |                  |              |
| StockMarket-Trustworthiness    | Student's <i>t</i> | -3.54     |          | 543  | <.001    | -0.49                    | -0.77, -0.22 | -0.30            | -0.47, -0.13 |
|                                | BF <sub>10</sub>   | 40.336    | 9.92e0-9 |      |          |                          |              |                  |              |
| StockMarket-C-Trustworthiness  | Student's <i>t</i> | -2.834    |          | 539  | 0.005    | -0.38                    | -0.65, -0.12 | -0.24            | -0.41, -0.07 |
|                                | BF <sub>10</sub>   | 4.673     | 8.54e0-8 |      |          |                          |              |                  |              |
| Morality-Trustworthiness       | Student's <i>t</i> | -4.793    |          | 543  | <.001    | -0.70                    | -0.99, -0.41 | -0.41            | -0.58, -0.24 |
|                                | BF <sub>10</sub>   | 5661.492  | 5.95E-11 |      |          |                          |              |                  |              |
| Morality-C-Trustworthiness     | Student's <i>t</i> | -3.799    |          | 539  | <.001    | -0.55                    | -0.83, -0.26 | -0.33            | -0.50, -0.16 |
|                                | BF <sub>10</sub>   | 99.881    | 3.67e0-9 |      |          |                          |              |                  |              |
| TanningBeds-Trustworthiness    | Student's <i>t</i> | 1.089     |          | 543  | 0.277    | 0.15                     | -0.12, 0.43  | 0.09             | -0.08, 0.26  |
|                                | BF <sub>10</sub>   | 0.17      | 3.06e0-6 |      |          |                          |              |                  |              |
| TanningBeds-C-Trustworthiness  | Student's <i>t</i> | -0.744    |          | 539  | 0.457    | -0.10                    | -0.36, 0.16  | -0.06            | -0.23, 0.10  |
|                                | BF <sub>10</sub>   | 0.125     | 3.99e0-6 |      |          |                          |              |                  |              |
| VideoGames-Trustworthiness     | Student's <i>t</i> | -3.128    |          | 542  | 0.002    | -0.43                    | -0.70, -0.16 | -0.27            | -0.44, -0.10 |
|                                | BF <sub>10</sub>   | 10.827    | 3.95e0-8 |      |          |                          |              |                  |              |
| VideoGames-C-Trustworthiness   | Student's <i>t</i> | 1.425     |          | 540  | 0.155    | 0.20                     | -0.08, 0.49  | 0.12             | -0.05, 0.29  |
|                                | BF <sub>10</sub>   | 0.257     | 1.92e0-6 |      |          |                          |              |                  |              |
| TrueOrFalse-Trustworthiness    | Student's <i>t</i> | -1.237    |          | 540  | 0.217    | -0.18                    | -0.47, 0.11  | -0.11            | -0.27, 0.06  |
|                                | BF <sub>10</sub>   | 0.201     | 2.48e0-6 |      |          |                          |              |                  |              |
| TrueOrFalse-C-Trustworthiness  | Student's <i>t</i> | -1.433    |          | 542  | 0.152    | -0.21                    | -0.51, 0.08  | -0.12            | -0.29, 0.05  |
|                                | BF <sub>10</sub>   | 0.259     | 1.97e0-6 |      |          |                          |              |                  |              |
| Consensus-Trustworthiness      | Student's <i>t</i> | 0.519     |          | 542  | 0.604    | 0.08                     | -0.22, 0.38  | 0.04             | -0.12, 0.21  |
|                                | BF <sub>10</sub>   | 0.109     | 4.87e0-6 |      |          |                          |              |                  |              |
| Consensus-C-Trustworthiness    | Student's <i>t</i> | -3.714    |          | 540  | <.001    | -0.56                    | -0.86, -0.26 | -0.32            | -0.49, -0.15 |
|                                | BF <sub>10</sub>   | 73.605    | 5.04e0-9 |      |          |                          |              |                  |              |
| Predictions-Trustworthiness    | Student's <i>t</i> | -2.39     |          | 543  | 0.017    | -0.32                    | -0.58, -0.06 | -0.20            | -0.37, -0.04 |
|                                | BF <sub>10</sub>   | 1.522     | 3.13e0-7 |      |          |                          |              |                  |              |
| Predictions-C-Trustworthiness  | Student's <i>t</i> | 0.805     |          | 539  | 0.421    | 0.11                     | -0.15, 0.37  | 0.07             | -0.10, 0.24  |
|                                | BF <sub>10</sub>   | 0.131     | 3.80e0-6 |      |          |                          |              |                  |              |
| Temperatures-Trustworthiness   | Student's <i>t</i> | -0.585    |          | 543  | 0.559    | -0.08                    | -0.33, 0.18  | -0.05            | -0.22, 0.12  |
|                                | BF <sub>10</sub>   | 0.113     | 4.79e0-6 |      |          |                          |              |                  |              |
| Temperatures-C-Trustworthiness | Student's <i>t</i> | -0.325    |          | 539  | 0.745    | -0.05                    | -0.34, 0.24  | -0.03            | -0.20, 0.14  |
|                                | BF <sub>10</sub>   | 0.101     | 5.01e0-6 |      |          |                          |              |                  |              |
| DataPrivacy-Trustworthiness    | Student's <i>t</i> | -7.856    |          | 541  | <.001    | -1.21                    | -1.51, -0.91 | -0.67            | -0.85, -0.50 |
|                                | BF <sub>10</sub>   | 2.64E+11  | 6.03E-19 |      |          |                          |              |                  |              |
| DataPrivacy-C-Trustworthiness  | Student's <i>t</i> | -0.426    |          | 541  | 0.67     | -0.06                    | -0.35, 0.22  | -0.04            | -0.20, 0.13  |
|                                | BF <sub>10</sub>   | 0.104     | 5.03e0-6 |      |          |                          |              |                  |              |
| Beliefs-Trustworthiness        | Student's <i>t</i> | -2.093    |          | 541  | 0.037    | -0.27                    | -0.52, -0.02 | -0.18            | -0.35, -0.01 |
|                                | BF <sub>10</sub>   | 0.801     | 5.92e0-7 |      |          |                          |              |                  |              |
| Beliefs-C-Trustworthiness      | Student's <i>t</i> | 2.935     |          | 541  | 0.003    | 0.41                     | 0.14, 0.69   | 0.25             | 0.08, 0.42   |
|                                | BF <sub>10</sub>   | 6.168     | 6.99e0-8 |      |          |                          |              |                  |              |

<sup>a</sup> Levene's test is significant (*p* < .05), suggesting a violation of the assumption of equal variances

**Table S10.**

Study 2 (incoherence): sharing intentions measure item-level results (independent samples and Bayesian *t*-tests). *Note:* Bayesian prior used is 0.707 (representing an 80% chance that the effect size is between -2 and 2). “-C-“ denotes a manipulative post’s matched neutral control.

| Sharing                |                    | Statistic | ±%       | df   | <i>p</i> | <i>M<sub>diff</sub></i> | 95%CI        | Cohen's <i>d</i> | 95%CI        |
|------------------------|--------------------|-----------|----------|------|----------|-------------------------|--------------|------------------|--------------|
| Manipulative-Sharing   | Student's <i>t</i> | -1.1953   |          | 1084 | 0.232    | -0.09                   | -0.23, 0.06  | -0.07            | -0.19, 0.05  |
|                        | BF <sub>10</sub>   | 0.1375    | 2.53E-04 |      |          |                         |              |                  |              |
| Neutral-Sharing        | Student's <i>t</i> | 0.0464    |          | 1082 | 0.963    | 0.00                    | -0.16, 0.17  | 0.00             | -0.12, 0.12  |
|                        | BF <sub>10</sub>   | 0.0681    | 5.08E-04 |      |          |                         |              |                  |              |
| Discernment-Sharing    | Student's <i>t</i> | 1.6036    |          | 1082 | 0.109    | 0.10                    | -0.02, 0.22  | 0.10             | -0.02, 0.22  |
|                        | BF <sub>10</sub>   | 0.2417    | 1.40E-04 |      |          |                         |              |                  |              |
| StockMarket-Sharing    | Student's <i>t</i> | 0.7448    |          | 543  | 0.457    | 0.10                    | -0.17, 0.38  | 0.06             | -0.10, 0.23  |
|                        | BF <sub>10</sub>   | 0.1251    | 4.19E-06 |      |          |                         |              |                  |              |
| StockMarket-C-Sharing  | Student's <i>t</i> | -1.4887   |          | 539  | 0.137    | -0.20                   | -0.47, 0.06  | -0.13            | -0.30, 0.04  |
|                        | BF <sub>10</sub>   | 0.2817    | 1.63E-06 |      |          |                         |              |                  |              |
| Morality-Sharing       | Student's <i>t</i> | -1.7183   |          | 543  | 0.086    | -0.25                   | -0.53, 0.04  | -0.15            | -0.32, 0.02  |
|                        | BF <sub>10</sub>   | 0.4004    | 1.27E-06 |      |          |                         |              |                  |              |
| Morality-C-Sharing     | Student's <i>t</i> | -2.1472   |          | 539  | 0.032    | -0.32                   | -0.62, -0.03 | -0.18            | -0.35, -0.02 |
|                        | BF <sub>10</sub>   | 0.8966    | 5.08E-07 |      |          |                         |              |                  |              |
| TanningBeds-Sharing    | Student's <i>t</i> | 0.2995    |          | 543  | 0.765    | 0.04                    | -0.22, 0.31  | 0.03             | -0.14, 0.19  |
|                        | BF <sub>10</sub>   | 0.0997    | 5.36E-06 |      |          |                         |              |                  |              |
| TanningBeds-C-Sharing  | Student's <i>t</i> | 0.6516    |          | 539  | 0.515    | 0.11                    | -0.22, 0.44  | 0.06             | -0.11, 0.22  |
|                        | BF <sub>10</sub>   | 0.1177    | 4.26E-06 |      |          |                         |              |                  |              |
| VideoGames-Sharing     | Student's <i>t</i> | -1.3248   |          | 542  | 0.186    | -0.17                   | -0.43, 0.08  | -0.11            | -0.28, 0.05  |
|                        | BF <sub>10</sub>   | 0.2241    | 2.29E-06 |      |          |                         |              |                  |              |
| VideoGames-C-Sharing   | Student's <i>t</i> | 0.9795    |          | 540  | 0.328    | 0.14                    | -0.14, 0.42  | 0.08             | -0.08, 0.25  |
|                        | BF <sub>10</sub>   | 0.1525    | 3.32E-06 |      |          |                         |              |                  |              |
| TrueOrFalse-Sharing    | Student's <i>t</i> | -1.3688   |          | 540  | 0.172    | -0.19                   | -0.46, 0.08  | -0.12            | -0.29, 0.05  |
|                        | BF <sub>10</sub>   | 0.2378    | 2.08E-06 |      |          |                         |              |                  |              |
| TrueOrFalse-C-Sharing  | Student's <i>t</i> | -0.0649   |          | 542  | 0.948    | -0.01                   | -0.32, 0.30  | -0.01            | -0.17, 0.16  |
|                        | BF <sub>10</sub>   | 0.0956    | 5.61E-06 |      |          |                         |              |                  |              |
| Consensus-Sharing      | Student's <i>t</i> | -0.6266   |          | 542  | 0.531    | -0.09                   | -0.35, 0.18  | -0.05            | -0.22, 0.11  |
|                        | BF <sub>10</sub>   | 0.1155    | 4.57E-06 |      |          |                         |              |                  |              |
| Consensus-C-Sharing    | Student's <i>t</i> | -1.4069   |          | 540  | 0.16     | -0.24                   | -0.57, 0.09  | -0.12            | -0.29, 0.05  |
|                        | BF <sub>10</sub>   | 0.2505    | 1.94E-06 |      |          |                         |              |                  |              |
| Predictions-Sharing    | Student's <i>t</i> | -0.6986   |          | 543  | 0.485    | -0.09                   | -0.34, 0.16  | -0.06            | -0.23, 0.11  |
|                        | BF <sub>10</sub>   | 0.1209    | 4.45E-06 |      |          |                         |              |                  |              |
| Predictions-C-Sharing  | Student's <i>t</i> | 2.2643    |          | 539  | 0.024    | 0.38                    | 0.05, 0.71   | 0.19             | 0.03, 0.36   |
|                        | BF <sub>10</sub>   | 1.1512    | 3.88E-07 |      |          |                         |              |                  |              |
| Temperatures-Sharing   | Student's <i>t</i> | -1.6652   |          | 543  | 0.096    | -0.19                   | -0.42, 0.03  | -0.14            | -0.31, 0.03  |
|                        | BF <sub>10</sub>   | 0.367     | 1.39E-06 |      |          |                         |              |                  |              |
| Temperatures-C-Sharing | Student's <i>t</i> | -0.2643   |          | 539  | 0.792    | -0.04                   | -0.38, 0.29  | -0.02            | -0.19, 0.15  |
|                        | BF <sub>10</sub>   | 0.099     | 5.11E-06 |      |          |                         |              |                  |              |
| DataPrivacy-Sharing    | Student's <i>t</i> | -2.2909   |          | 541  | 0.022    | -0.33                   | -0.62, -0.05 | -0.20            | -0.37, -0.03 |
|                        | BF <sub>10</sub>   | 1.2186    | 3.82E-07 |      |          |                         |              |                  |              |
| DataPrivacy-C-Sharing  | Student's <i>t</i> | 1.0127    |          | 541  | 0.312    | 0.16                    | -0.15, 0.46  | 0.09             | -0.08, 0.26  |
|                        | BF <sub>10</sub>   | 0.1573    | 3.27E-06 |      |          |                         |              |                  |              |
| Beliefs-Sharing        | Student's <i>t</i> | -1.1102   |          | 541  | 0.267    | -0.12                   | -0.33, 0.09  | -0.10            | -0.26, 0.07  |
|                        | BF <sub>10</sub>   | 0.174     | 2.94E-06 |      |          |                         |              |                  |              |
| Beliefs-C-Sharing      | Student's <i>t</i> | 1.7352    |          | 541  | 0.083    | 0.22                    | -0.03, 0.46  | 0.15             | -0.02, 0.32  |
|                        | BF <sub>10</sub>   | 0.4126    | 1.19E-06 |      |          |                         |              |                  |              |

<sup>a</sup> Levene's test is significant ( $p < .05$ ), suggesting a violation of the assumption of equal variances

**Table S11.**

Study 3 (false dichotomies): technique recognition measure item-level results (independent samples and Bayesian *t*-tests). *Note:* Bayesian prior used is 0.707 (representing an 80% chance that the effect size is between -2 and 2). “-C-“ denotes a manipulative post’s matched neutral control.

| False dichotomy          |                    | Statistic  | ±%       | df   | <i>p</i> | $M_{diff}$ | 95%CI        | Cohen's <i>d</i> | 95%CI        |
|--------------------------|--------------------|------------|----------|------|----------|------------|--------------|------------------|--------------|
| Manipulative-Dichotomy   | Student's <i>t</i> | 13.369     |          | 1092 | <.001    | 1.01       | 0.86, 1.16   | 0.81             | 0.68, 0.94   |
|                          | BF <sub>10</sub>   | 2.81E+34   | 3.95E-40 |      |          |            |              |                  |              |
| Neutral-Dichotomy        | Student's <i>t</i> | -1.502     |          | 1091 | 0.133    | -0.10      | -0.24, 0.03  | -0.09            | -0.21, 0.03  |
|                          | BF <sub>10</sub>   | 0.2061     | 1.78e0-4 |      |          |            |              |                  |              |
| Discernment-Dichotomy    | Student's <i>t</i> | 11.287     |          | 1091 | <.001    | 1.10       | 0.91, 1.29   | 0.68             | 0.56, 0.81   |
|                          | BF <sub>10</sub>   | 5.46E+24   | 2.81E-30 |      |          |            |              |                  |              |
| Business-Dichotomy       | Student's <i>t</i> | 6.592      |          | 546  | <.001    | 1.00       | 0.70, 1.30   | 0.56             | 0.39, 0.74   |
|                          | BF <sub>10</sub>   | 7.41e0+7   | 3.38E-15 |      |          |            |              |                  |              |
| Business-C-Dichotomy     | Student's <i>t</i> | -0.859     |          | 545  | 0.391    | -0.13      | -0.42, 0.17  | -0.07            | -0.24, 0.09  |
|                          | BF <sub>10</sub>   | 0.1363     | 4.05e0-6 |      |          |            |              |                  |              |
| Coffee-Dichotomy         | Student's <i>t</i> | 6.988      |          | 544  | <.001    | 1.06       | 0.76, 1.36   | 0.60             | 0.42, 0.77   |
|                          | BF <sub>10</sub>   | 8.46e0+8   | 2.46E-16 |      |          |            |              |                  |              |
| Coffee-C-Dichotomy       | Student's <i>t</i> | -1.503     |          | 547  | 0.134    | -0.21      | -0.48, 0.06  | -0.13            | -0.30, 0.04  |
|                          | BF <sub>10</sub>   | 0.285      | 1.91e0-6 |      |          |            |              |                  |              |
| Combat-Dichotomy         | Student's <i>t</i> | 6.683      |          | 545  | <.001    | 1.04       | 0.73, 1.34   | 0.57             | 0.40, 0.75   |
|                          | BF <sub>10</sub>   | 1.28e0+8   | 1.90E-15 |      |          |            |              |                  |              |
| Combat-C-Dichotomy       | Student's <i>t</i> | 1.439      |          | 546  | 0.151    | 0.22       | -0.08, 0.53  | 0.12             | -0.05, 0.29  |
|                          | BF <sub>10</sub>   | 0.2603     | 2.09e0-6 |      |          |            |              |                  |              |
| Education-Dichotomy      | Student's <i>t</i> | 5.087      |          | 540  | <.001    | 0.84       | 0.51, 1.16   | 0.44             | 0.26, 0.61   |
|                          | BF <sub>10</sub>   | 22133.0957 | 1.31E-11 |      |          |            |              |                  |              |
| Education-C-Dichotomy    | Student's <i>t</i> | -1.948     |          | 551  | 0.052    | -0.29      | -0.59, 0.00  | -0.17            | -0.33, 0.00  |
|                          | BF <sub>10</sub>   | 0.5989     | 9.42e0-7 |      |          |            |              |                  |              |
| JohnLewis-Dichotomy      | Student's <i>t</i> | 4.516      |          | 544  | <.001    | 0.72       | 0.41, 1.03   | 0.39             | 0.22, 0.56   |
|                          | BF <sub>10</sub>   | 1686.2847  | 2.10E-10 |      |          |            |              |                  |              |
| JohnLewis-C-Dichotomy    | Student's <i>t</i> | -3.341     |          | 547  | <.001    | -0.48      | -0.77, -0.20 | -0.29            | -0.45, -0.12 |
|                          | BF <sub>10</sub>   | 20.8557    | 2.18e0-8 |      |          |            |              |                  |              |
| Party-Dichotomy          | Student's <i>t</i> | 6.945      |          | 545  | <.001    | 1.13       | 0.81, 1.45   | 0.59             | 0.42, 0.77   |
|                          | BF <sub>10</sub>   | 6.43e0+8   | 3.57E-16 |      |          |            |              |                  |              |
| Party-C-Dichotomy        | Student's <i>t</i> | 0.598      |          | 546  | 0.55     | 0.09       | -0.21, 0.39  | 0.05             | -0.12, 0.22  |
|                          | BF <sub>10</sub>   | 0.1132     | 4.93e0-6 |      |          |            |              |                  |              |
| Potatoes-Dichotomy       | Student's <i>t</i> | 6.654      |          | 546  | <.001    | 1.03       | 0.73, 1.33   | 0.57             | 0.39, 0.74   |
|                          | BF <sub>10</sub>   | 1.07e0+8   | 2.25E-15 |      |          |            |              |                  |              |
| Potatoes-C-Dichotomy     | Student's <i>t</i> | -0.186     |          | 545  | 0.852    | -0.03      | -0.34, 0.28  | -0.02            | -0.18, 0.15  |
|                          | BF <sub>10</sub>   | 0.0971     | 5.43e0-6 |      |          |            |              |                  |              |
| Problem-Dichotomy        | Student's <i>t</i> | 10.273     |          | 545  | <.001    | 1.62       | 1.31, 1.93   | 0.88             | 0.69, 1.06   |
|                          | BF <sub>10</sub>   | 3.72E+19   | 1.77E-24 |      |          |            |              |                  |              |
| Problem-C-Dichotomy      | Student's <i>t</i> | 3.528      |          | 546  | <.001    | 0.55       | 0.24, 0.86   | 0.30             | 0.13, 0.47   |
|                          | BF <sub>10</sub>   | 38.614     | 1.13e0-8 |      |          |            |              |                  |              |
| SocServ-Dichotomy        | Student's <i>t</i> | 3.625      |          | 540  | <.001    | 0.62       | 0.28, 0.96   | 0.31             | 0.14, 0.48   |
|                          | BF <sub>10</sub>   | 53.9144    | 6.99e0-9 |      |          |            |              |                  |              |
| SocServ-C-Dichotomy      | Student's <i>t</i> | -1.457     |          | 551  | 0.146    | -0.23      | -0.55, 0.08  | -0.12            | -0.29, 0.04  |
|                          | BF <sub>10</sub>   | 0.266      | 2.20e0-6 |      |          |            |              |                  |              |
| Surveillance-Dichotomy   | Student's <i>t</i> | 6.123      |          | 545  | <.001    | 0.97       | 0.66, 1.28   | 0.52             | 0.35, 0.70   |
|                          | BF <sub>10</sub>   | 4.84e0+6   | 5.68E-14 |      |          |            |              |                  |              |
| Surveillance-C-Dichotomy | Student's <i>t</i> | 1.652      |          | 546  | 0.099    | 0.26       | -0.05, 0.57  | 0.14             | -0.03, 0.31  |
|                          | BF <sub>10</sub>   | 0.3583     | 1.48e0-6 |      |          |            |              |                  |              |

<sup>a</sup> Levene's test is significant ( $p < .05$ ), suggesting a violation of the assumption of equal variances



**Table S12.**

Study 3 (false dichotomies): confidence measure item-level results (independent samples and Bayesian *t*-tests). *Note:* Bayesian prior used is 0.707 (representing an 80% chance that the effect size is between -2 and 2). “-C-“ denotes a manipulative post’s matched neutral control.

| Confidence                | Statistic          | ±%         | df       | <i>p</i> | <i>M<sub>air</sub></i> | 95%CI | Cohen's <i>d</i> | 95%CI |
|---------------------------|--------------------|------------|----------|----------|------------------------|-------|------------------|-------|
| Manipulative-Confidence   | Student's <i>t</i> | 7.919      |          |          |                        |       |                  |       |
|                           | BF <sub>10</sub>   | 8.41E+11   | 2.80E-17 | 1092     | <.001                  | 0.52  | 0.39, 0.65       | 0.48  |
| Neutral-Confidence        | Student's <i>t</i> | 4.024      |          |          |                        |       |                  |       |
|                           | BF <sub>10</sub>   | 189.802    | 1.72e0-7 | 1091     | <.001                  | 0.28  | 0.15, 0.42       | 0.24  |
| Discernment-Confidence    | Student's <i>t</i> | 4.059      |          |          |                        |       |                  |       |
|                           | BF <sub>10</sub>   | 217.04     | 1.50e0-7 | 1091     | <.001                  | 0.23  | 0.12, 0.34       | 0.25  |
| Business-Confidence       | Student's <i>t</i> | 5.438      |          |          |                        |       |                  |       |
|                           | BF <sub>10</sub>   | 124228.696 | 2.54E-12 | 546      | <.001                  | 0.67  | 0.43, 0.92       | 0.46  |
| Business-C-Confidence     | Student's <i>t</i> | 0.779      |          |          |                        |       |                  |       |
|                           | BF <sub>10</sub>   | 0.128      | 4.33e0-6 | 545      | 0.436                  | 0.10  | -0.15, 0.35      | 0.07  |
| Coffee-Confidence         | Student's <i>t</i> | 4.754      |          |          |                        |       |                  |       |
|                           | BF <sub>10</sub>   | 4768.04    | 6.96E-11 | 544      | <.001                  | 0.62  | 0.36, 0.87       | 0.41  |
| Coffee-C-Confidence       | Student's <i>t</i> | 2.131      |          |          |                        |       |                  |       |
|                           | BF <sub>10</sub>   | 0.861      | 6.02e0-7 | 547      | 0.034                  | 0.28  | 0.02, 0.53       | 0.18  |
| Combat-Confidence         | Student's <i>t</i> | 5.128      |          |          |                        |       |                  |       |
|                           | BF <sub>10</sub>   | 26937.439  | 1.23E-11 | 545      | <.001                  | 0.68  | 0.42, 0.94       | 0.44  |
| Combat-C-Confidence       | Student's <i>t</i> | 1.719      |          |          |                        |       |                  |       |
|                           | BF <sub>10</sub>   | 0.4        | 1.33e0-6 | 546      | 0.086                  | 0.22  | -0.03, 0.48      | 0.15  |
| Education-Confidence      | Student's <i>t</i> | 2.333      |          |          |                        |       |                  |       |
|                           | BF <sub>10</sub>   | 1.339      | 3.32e0-7 | 540      | 0.02                   | 0.30  | 0.05, 0.55       | 0.20  |
| Education-C-Confidence    | Student's <i>t</i> | 2.406      |          |          |                        |       |                  |       |
|                           | BF <sub>10</sub>   | 1.571      | 3.45e0-7 | 551      | 0.016                  | 0.31  | 0.06, 0.56       | 0.20  |
| JohnLewis-Confidence      | Student's <i>t</i> | 3.008      |          |          |                        |       |                  |       |
|                           | BF <sub>10</sub>   | 7.588      | 5.85e0-8 | 544      | 0.003                  | 0.38  | 0.13, 0.63       | 0.26  |
| JohnLewis-C-Confidence    | Student's <i>t</i> | 4.22       |          |          |                        |       |                  |       |
|                           | BF <sub>10</sub>   | 494.601    | 8.13E-10 | 547      | <.001                  | 0.57  | 0.30, 0.83       | 0.36  |
| Party-Confidence          | Student's <i>t</i> | 3.313      |          |          |                        |       |                  |       |
|                           | BF <sub>10</sub>   | 19.125     | 2.31e0-8 | 545      | <.001                  | 0.43  | 0.17, 0.68       | 0.28  |
| Party-C-Confidence        | Student's <i>t</i> | 2.433      |          |          |                        |       |                  |       |
|                           | BF <sub>10</sub>   | 1.681      | 2.92e0-7 | 546      | 0.015                  | 0.32  | 0.06, 0.58       | 0.21  |
| Potatoes-Confidence       | Student's <i>t</i> | 4.028      |          |          |                        |       |                  |       |
|                           | BF <sub>10</sub>   | 234.221    | 1.68e0-9 | 546      | <.001                  | 0.48  | 0.25, 0.71       | 0.34  |
| Potatoes-C-Confidence     | Student's <i>t</i> | 2.652      |          |          |                        |       |                  |       |
|                           | BF <sub>10</sub>   | 2.882      | 1.55e0-7 | 545      | 0.008                  | 0.35  | 0.09, 0.60       | 0.23  |
| Problem-Confidence        | Student's <i>t</i> | 5.919      |          |          |                        |       |                  |       |
|                           | BF <sub>10</sub>   | 1.56e0+6   | 1.83E-13 | 545      | <.001                  | 0.70  | 0.47, 0.94       | 0.51  |
| Problem-C-Confidence      | Student's <i>t</i> | 2.456      |          |          |                        |       |                  |       |
|                           | BF <sub>10</sub>   | 1.774      | 2.80e0-7 | 546      | 0.014                  | 0.32  | 0.06, 0.58       | 0.21  |
| SocServ-Confidence        | Student's <i>t</i> | 3.039      |          |          |                        |       |                  |       |
|                           | BF <sub>10</sub>   | 8.334      | 4.92e0-8 | 540      | 0.002                  | 0.38  | 0.13, 0.63       | 0.26  |
| SocServ-C-Confidence      | Student's <i>t</i> | 2.82       |          |          |                        |       |                  |       |
|                           | BF <sub>10</sub>   | 4.452      | 1.17e0-7 | 551      | 0.005                  | 0.38  | 0.11, 0.64       | 0.24  |
| Surveillance-Confidence   | Student's <i>t</i> | 3.088      |          |          |                        |       |                  |       |
|                           | BF <sub>10</sub>   | 9.57       | 4.75e0-8 | 545      | 0.002                  | 0.40  | 0.14, 0.65       | 0.26  |
| Surveillance-C-Confidence | Student's <i>t</i> | 2.967      |          |          |                        |       |                  |       |
|                           | BF <sub>10</sub>   | 6.73       | 6.91e0-8 | 546      | 0.003                  | 0.38  | 0.13, 0.63       | 0.25  |

<sup>a</sup> Levene's test is significant ( $p < .05$ ), suggesting a violation of the assumption of equal variances

**Table S13.**

Study 3 (false dichotomies): trustworthiness measure item-level results (independent samples and Bayesian *t*-tests). *Note:* Bayesian prior used is 0.707 (representing an 80% chance that the effect size is between -2 and 2). “-C-“ denotes a manipulative post’s matched neutral control.

| Trustworthiness                |                    | Statistic | ±%       | df   | <i>p</i> | $M_{\text{diff}}$ | 95%CI        | Cohen's <i>d</i> | 95%CI          |
|--------------------------------|--------------------|-----------|----------|------|----------|-------------------|--------------|------------------|----------------|
| Manipulative-Trustworthiness   | Student's <i>t</i> | -3.931    |          | 1092 | < .001   | -0.29             | -0.44, -0.15 | -0.24            | -0.36, -0.12   |
|                                | BF <sub>10</sub>   | 131.965   | 2.50e0-7 |      |          |                   |              |                  |                |
| Neutral-Trustworthiness        | Student's <i>t</i> | 1.192     |          | 1091 | 0.233    | 0.08              | -0.05, 0.20  | 0.07             | -0.05, 0.19    |
|                                | BF <sub>10</sub>   | 0.137     | 2.70e0-4 |      |          |                   |              |                  |                |
| Discernment-Trustworthiness    | Student's <i>t</i> | 5.293     |          | 1091 | < .001   | 0.37              | 0.24, 0.51   | 0.32             | 0.20, 0.44     |
|                                | BF <sub>10</sub>   | 58111.555 | 5.11E-10 |      |          |                   |              |                  |                |
| Business-Trustworthiness       | Student's <i>t</i> | -1.98     |          | 546  | 0.048    | -0.28             | -0.56, 0.00  | -0.17            | -0.34, -0.0009 |
|                                | BF <sub>10</sub>   | 0.638     | 8.07e0-7 |      |          |                   |              |                  |                |
| Business-C-Trustworthiness     | Student's <i>t</i> | 0.608     |          | 545  | 0.543    | 0.08              | -0.17, 0.32  | 0.05             | -0.12, 0.22    |
|                                | BF <sub>10</sub>   | 0.114     | 4.89e0-6 |      |          |                   |              |                  |                |
| Coffee-Trustworthiness         | Student's <i>t</i> | -1.227    |          | 544  | 0.22     | -0.17             | -0.44, 0.10  | -0.11            | -0.27, 0.06    |
|                                | BF <sub>10</sub>   | 0.199     | 2.60e0-6 |      |          |                   |              |                  |                |
| Coffee-C-Trustworthiness       | Student's <i>t</i> | -1.377    |          | 547  | 0.169    | -0.16             | -0.39, 0.07  | -0.12            | -0.29, 0.05    |
|                                | BF <sub>10</sub>   | 0.239     | 2.30e0-6 |      |          |                   |              |                  |                |
| Combat-Trustworthiness         | Student's <i>t</i> | -2.927    |          | 545  | 0.004    | -0.42             | -0.70, -0.14 | -0.25            | -0.42, -0.08   |
|                                | BF <sub>10</sub>   | 6.014     | 7.69e0-8 |      |          |                   |              |                  |                |
| Combat-C-Trustworthiness       | Student's <i>t</i> | -1.889    |          | 546  | 0.059    | -0.24             | -0.50, 0.01  | -0.16            | -0.33, 0.01    |
|                                | BF <sub>10</sub>   | 0.538     | 9.75e0-7 |      |          |                   |              |                  |                |
| Education-Trustworthiness      | Student's <i>t</i> | -2.11     |          | 540  | 0.035    | -0.31             | -0.59, -0.02 | -0.18            | -0.35, -0.01   |
|                                | BF <sub>10</sub>   | 0.831     | 5.48e0-7 |      |          |                   |              |                  |                |
| Education-C-Trustworthiness    | Student's <i>t</i> | 0.986     |          | 551  | 0.325    | 0.12              | -0.12, 0.36  | 0.08             | -0.08, 0.25    |
|                                | BF <sub>10</sub>   | 0.152     | 3.95e0-6 |      |          |                   |              |                  |                |
| JohnLewis-Trustworthiness      | Student's <i>t</i> | -1.947    |          | 544  | 0.052    | -0.26             | -0.53, 0.00  | -0.17            | -0.34, 0.00    |
|                                | BF <sub>10</sub>   | 0.601     | 8.30e0-7 |      |          |                   |              |                  |                |
| JohnLewis-C-Trustworthiness    | Student's <i>t</i> | 1.357     |          | 547  | 0.175    | 0.18              | -0.08, 0.44  | 0.12             | -0.05, 0.28    |
|                                | BF <sub>10</sub>   | 0.233     | 2.38e0-6 |      |          |                   |              |                  |                |
| Party-Trustworthiness          | Student's <i>t</i> | -0.906    |          | 545  | 0.365    | -0.13             | -0.41, 0.15  | -0.08            | -0.25, 0.09    |
|                                | BF <sub>10</sub>   | 0.142     | 3.88e0-6 |      |          |                   |              |                  |                |
| Party-C-Trustworthiness        | Student's <i>t</i> | 1.121     |          | 546  | 0.263    | 0.15              | -0.12, 0.42  | 0.10             | -0.07, 0.26    |
|                                | BF <sub>10</sub>   | 0.175     | 3.12e0-6 |      |          |                   |              |                  |                |
| Potatoes-Trustworthiness       | Student's <i>t</i> | -2.359    |          | 546  | 0.019    | -0.33             | -0.60, -0.06 | -0.20            | -0.37, -0.03   |
|                                | BF <sub>10</sub>   | 1.418     | 3.45e0-7 |      |          |                   |              |                  |                |
| Potatoes-C-Trustworthiness     | Student's <i>t</i> | 3.113     |          | 545  | 0.002    | 0.41              | 0.15, 0.66   | 0.27             | 0.10, 0.44     |
|                                | BF <sub>10</sub>   | 10.345    | 4.07e0-8 |      |          |                   |              |                  |                |
| Problem-Trustworthiness        | Student's <i>t</i> | -5.175    |          | 545  | < .001   | -0.79             | -1.09, -0.49 | -0.44            | -0.61, -0.27   |
|                                | BF <sub>10</sub>   | 33816.269 | 9.72E-12 |      |          |                   |              |                  |                |
| Problem-C-Trustworthiness      | Student's <i>t</i> | -0.578    |          | 546  | 0.563    | -0.08             | -0.34, 0.19  | -0.05            | -0.22, 0.12    |
|                                | BF <sub>10</sub>   | 0.112     | 5.05e0-6 |      |          |                   |              |                  |                |
| SocServ-Trustworthiness        | Student's <i>t</i> | -1.492    |          | 540  | 0.136    | -0.24             | -0.55, 0.07  | -0.13            | -0.30, 0.04    |
|                                | BF <sub>10</sub>   | 0.282     | 1.71e0-6 |      |          |                   |              |                  |                |
| SocServ-C-Trustworthiness      | Student's <i>t</i> | 3.25      |          | 551  | 0.001    | 0.41              | 0.16, 0.65   | 0.28             | 0.11, 0.44     |
|                                | BF <sub>10</sub>   | 15.613    | 3.16e0-8 |      |          |                   |              |                  |                |
| Surveillance-Trustworthiness   | Student's <i>t</i> | -0.777    |          | 545  | 0.438    | -0.11             | -0.39, 0.17  | -0.07            | -0.23, 0.10    |
|                                | BF <sub>10</sub>   | 0.128     | 4.34e0-6 |      |          |                   |              |                  |                |
| Surveillance-C-Trustworthiness | Student's <i>t</i> | -0.364    |          | 546  | 0.716    | -0.04             | -0.28, 0.19  | -0.03            | -0.20, 0.14    |
|                                | BF <sub>10</sub>   | 0.101     | 5.56e0-6 |      |          |                   |              |                  |                |

<sup>a</sup> Levene's test is significant ( $p < .05$ ), suggesting a violation of the assumption of equal variances

**Table S14.**

Study 3 (false dichotomies): sharing intentions measure item-level results (independent samples and Bayesian *t*-tests). *Note:* Bayesian prior used is 0.707 (representing an 80% chance that the effect size is between -2 and 2). “-C-“ denotes a manipulative post’s matched neutral control.

| Sharing                |                    | Statistic | ±%       | df   | <i>p</i> | <i>M</i> <sub>diff</sub> | 95%CI        | Cohen's <i>d</i> | 95%CI        |
|------------------------|--------------------|-----------|----------|------|----------|--------------------------|--------------|------------------|--------------|
| Manipulative-Sharing   | Student's <i>t</i> | -2.178    |          | 1092 | 0.03     | -0.19                    | -0.35, -0.02 | -0.13            | -0.25, -0.01 |
|                        | BF <sub>10</sub>   | 0.7001    | 5.16E-05 |      |          |                          |              |                  |              |
| Neutral-Sharing        | Student's <i>t</i> | 0.444     |          | 1091 | 0.657    | 0.04                     | -0.14, 0.22  | 0.03             | -0.09, 0.15  |
|                        | BF <sub>10</sub>   | 0.0747    | 4.99E-04 |      |          |                          |              |                  |              |
| Discernment-Sharing    | Student's <i>t</i> | 3.602     |          | 1091 | < .001   | 0.22                     | 0.10, 0.35   | 0.22             | 0.10, 0.34   |
|                        | BF <sub>10</sub>   | 39.4482   | 8.47E-07 |      |          |                          |              |                  |              |
| Business-Sharing       | Student's <i>t</i> | -1.817    |          | 546  | 0.07     | -0.26                    | -0.53, 0.02  | -0.16            | -0.32, 0.01  |
|                        | BF <sub>10</sub>   | 0.4732    | 1.11E-06 |      |          |                          |              |                  |              |
| Business-C-Sharing     | Student's <i>t</i> | 0.225     |          | 545  | 0.822    | 0.04                     | -0.27, 0.34  | 0.02             | -0.15, 0.19  |
|                        | BF <sub>10</sub>   | 0.0975    | 5.75E-06 |      |          |                          |              |                  |              |
| Coffee-Sharing         | Student's <i>t</i> | -0.741    |          | 544  | 0.459    | -0.11                    | -0.39, 0.18  | -0.06            | -0.23, 0.10  |
|                        | BF <sub>10</sub>   | 0.1246    | 4.24E-06 |      |          |                          |              |                  |              |
| Coffee-C-Sharing       | Student's <i>t</i> | -0.823    |          | 547  | 0.411    | -0.14                    | -0.49, 0.20  | -0.07            | -0.24, 0.10  |
|                        | BF <sub>10</sub>   | 0.1322    | 4.28E-06 |      |          |                          |              |                  |              |
| Combat-Sharing         | Student's <i>t</i> | -0.81     |          | 545  | 0.418    | -0.11                    | -0.38, 0.16  | -0.07            | -0.24, 0.10  |
|                        | BF <sub>10</sub>   | 0.131     | 4.21E-06 |      |          |                          |              |                  |              |
| Combat-C-Sharing       | Student's <i>t</i> | -1.608    |          | 546  | 0.108    | -0.22                    | -0.49, 0.05  | -0.14            | -0.31, 0.03  |
|                        | BF <sub>10</sub>   | 0.3344    | 1.60E-06 |      |          |                          |              |                  |              |
| Education-Sharing      | Student's <i>t</i> | -0.173    |          | 540  | 0.863    | -0.03                    | -0.35, 0.29  | -0.01            | -0.18, 0.15  |
|                        | BF <sub>10</sub>   | 0.0971    | 5.24E-06 |      |          |                          |              |                  |              |
| Education-C-Sharing    | Student's <i>t</i> | -0.624    |          | 551  | 0.533    | -0.11                    | -0.46, 0.24  | -0.05            | -0.22, 0.11  |
|                        | BF <sub>10</sub>   | 0.1145    | 5.31E-06 |      |          |                          |              |                  |              |
| JohnLewis-Sharing      | Student's <i>t</i> | -0.789    |          | 544  | 0.43     | -0.11                    | -0.40, 0.17  | -0.07            | -0.24, 0.10  |
|                        | BF <sub>10</sub>   | 0.1291    | 4.16E-06 |      |          |                          |              |                  |              |
| JohnLewis-C-Sharing    | Student's <i>t</i> | 0.477     |          | 547  | 0.633    | 0.06                     | -0.20, 0.33  | 0.04             | -0.13, 0.21  |
|                        | BF <sub>10</sub>   | 0.1061    | 5.42E-06 |      |          |                          |              |                  |              |
| Party-Sharing          | Student's <i>t</i> | -0.797    |          | 545  | 0.426    | -0.11                    | -0.39, 0.16  | -0.07            | -0.24, 0.10  |
|                        | BF <sub>10</sub>   | 0.1297    | 4.27E-06 |      |          |                          |              |                  |              |
| Party-C-Sharing        | Student's <i>t</i> | 1.005     |          | 546  | 0.315    | 0.16                     | -0.15, 0.46  | 0.09             | -0.08, 0.25  |
|                        | BF <sub>10</sub>   | 0.1556    | 3.53E-06 |      |          |                          |              |                  |              |
| Potatoes-Sharing       | Student's <i>t</i> | -2.576    |          | 546  | 0.01     | -0.38                    | -0.67, -0.09 | -0.22            | -0.39, -0.05 |
|                        | BF <sub>10</sub>   | 2.3774    | 2.01E-07 |      |          |                          |              |                  |              |
| Potatoes-C-Sharing     | Student's <i>t</i> | 0.695     |          | 545  | 0.487    | 0.11                     | -0.20, 0.41  | 0.06             | -0.11, 0.23  |
|                        | BF <sub>10</sub>   | 0.1208    | 4.31E-06 |      |          |                          |              |                  |              |
| Problem-Sharing        | Student's <i>t</i> | -2.643    |          | 545  | 0.008    | -0.44                    | -0.77, -0.11 | -0.23            | -0.39, -0.06 |
|                        | BF <sub>10</sub>   | 2.8099    | 1.70E-07 |      |          |                          |              |                  |              |
| Problem-C-Sharing      | Student's <i>t</i> | -0.963    |          | 546  | 0.336    | -0.15                    | -0.45, 0.15  | -0.08            | -0.25, 0.09  |
|                        | BF <sub>10</sub>   | 0.1494    | 3.73E-06 |      |          |                          |              |                  |              |
| SocServ-Sharing        | Student's <i>t</i> | -1.262    |          | 540  | 0.207    | -0.20                    | -0.51, 0.11  | -0.11            | -0.28, 0.06  |
|                        | BF <sub>10</sub>   | 0.2077    | 2.37E-06 |      |          |                          |              |                  |              |
| SocServ-C-Sharing      | Student's <i>t</i> | 1.953     |          | 551  | 0.051    | 0.34                     | 0.00, 0.68   | 0.17             | 0.00, 0.33   |
|                        | BF <sub>10</sub>   | 0.6042    | 9.35E-07 |      |          |                          |              |                  |              |
| Surveillance-Sharing   | Student's <i>t</i> | -0.697    |          | 545  | 0.486    | -0.11                    | -0.41, 0.20  | -0.06            | -0.23, 0.11  |
|                        | BF <sub>10</sub>   | 0.1206    | 4.61E-06 |      |          |                          |              |                  |              |
| Surveillance-C-Sharing | Student's <i>t</i> | 0.505     |          | 546  | 0.614    | 0.08                     | -0.24, 0.40  | 0.04             | -0.12, 0.21  |
|                        | BF <sub>10</sub>   | 0.1077    | 5.22E-06 |      |          |                          |              |                  |              |

<sup>a</sup> Levene's test is significant ( $p < .05$ ), suggesting a violation of the assumption of equal variances

**Table S15.**

Study 4 (scapegoating): technique recognition measure item-level results (independent samples and Bayesian *t*-tests). *Note:* Bayesian prior used is 0.707 (representing an 80% chance that the effect size is between -2 and 2). “-C-“ denotes a manipulative post’s matched neutral control.

| <b>Scapegoating</b>        |                    | <b>Statistic</b> | <b>±%</b> | <b>df</b> | <b><i>p</i></b> | <b><i>M<sub>diff</sub></i></b> | <b>95%CI</b> | <b>Cohen's <i>d</i></b> | <b>95%CI</b> |
|----------------------------|--------------------|------------------|-----------|-----------|-----------------|--------------------------------|--------------|-------------------------|--------------|
| Manipulative-Scapegoating  | Student's <i>t</i> | 6.634            |           | 1076      | < .001          | 0.46                           | 0.33, 0.60   | 0.40                    | 0.28, 0.53   |
|                            | BF <sub>10</sub>   | 1.23E+08         | 1.84E-13  |           |                 |                                |              |                         |              |
| Neutral-Scapegoating       | Student's <i>t</i> | -0.442           |           | 1077      | 0.658           | -0.03                          | -0.17, 0.11  | -0.03                   | -0.15, 0.09  |
|                            | BF <sub>10</sub>   | 0.0751           | 4.40e0-4  |           |                 |                                |              |                         |              |
| Discernment-Scapegoating   | Student's <i>t</i> | 4.525            |           | 1077      | < .001          | 0.47                           | 0.27, 0.68   | 0.28                    | 0.15, 0.40   |
|                            | BF <sub>10</sub>   | 1521.5281        | 1.81e0-8  |           |                 |                                |              |                         |              |
| Fiscal-Scapegoating        | Student's <i>t</i> | 2.874            |           | 537       | 0.004           | 0.35                           | 0.11, 0.59   | 0.25                    | 0.08, 0.42   |
|                            | BF <sub>10</sub>   | 5.2325           | 7.24e0-8  |           |                 |                                |              |                         |              |
| Fiscal-C-Scapegoating      | Student's <i>t</i> | 0.515            |           | 539       | 0.607           | 0.08                           | -0.23, 0.39  | 0.04                    | -0.12, 0.21  |
|                            | BF <sub>10</sub>   | 0.1091           | 4.48e0-6  |           |                 |                                |              |                         |              |
| Freewill-Scapegoating      | Student's <i>t</i> | 4.612            |           | 531       | < .001          | 0.62                           | 0.36, 0.89   | 0.40                    | 0.23, 0.57   |
|                            | BF <sub>10</sub>   | 2554.7549        | 1.02E-10  |           |                 |                                |              |                         |              |
| Freewill-C-Scapegoating    | Student's <i>t</i> | -1.541           |           | 545       | 0.124           | -0.20                          | -0.45, 0.05  | -0.13                   | -0.30, 0.04  |
|                            | BF <sub>10</sub>   | 0.3021           | 1.74e0-6  |           |                 |                                |              |                         |              |
| Gamers-Scapegoating        | Student's <i>t</i> | 4.008            |           | 535       | < .001          | 0.52                           | 0.27, 0.78   | 0.35                    | 0.17, 0.52   |
|                            | BF <sub>10</sub>   | 217.4438         | 1.49e0-9  |           |                 |                                |              |                         |              |
| Gamers-C-Scapegoating      | Student's <i>t</i> | -0.647           |           | 541       | 0.518           | -0.09                          | -0.38, 0.19  | -0.06                   | -0.22, 0.11  |
|                            | BF <sub>10</sub>   | 0.1171           | 4.46e0-6  |           |                 |                                |              |                         |              |
| Morality-Scapegoating      | Student's <i>t</i> | 6.679            |           | 538       | < .001          | 0.83                           | 0.59, 1.07   | 0.58                    | 0.40, 0.75   |
|                            | BF <sub>10</sub>   | 1.24E+08         | 1.60E-15  |           |                 |                                |              |                         |              |
| Morality-C-Scapegoating    | Student's <i>t</i> | 2.461            |           | 538       | 0.014           | 0.42                           | 0.08, 0.75   | 0.21                    | 0.04, 0.38   |
|                            | BF <sub>10</sub>   | 1.8053           | 2.39e0-7  |           |                 |                                |              |                         |              |
| Nuclear-Scapegoating       | Student's <i>t</i> | 3.416            |           | 543       | < .001          | 0.50                           | 0.21, 0.79   | 0.29                    | 0.12, 0.46   |
|                            | BF <sub>10</sub>   | 26.6768          | 1.57e0-8  |           |                 |                                |              |                         |              |
| Nuclear-C-Scapegoating     | Student's <i>t</i> | -0.332           |           | 533       | 0.74            | -0.05                          | -0.32, 0.22  | -0.03                   | -0.20, 0.14  |
|                            | BF <sub>10</sub>   | 0.1015           | 4.52e0-6  |           |                 |                                |              |                         |              |
| Politicians-Scapegoating   | Student's <i>t</i> | 4.948            |           | 535       | < .001          | 0.65                           | 0.39, 0.90   | 0.43                    | 0.25, 0.60   |
|                            | BF <sub>10</sub>   | 11537.1816       | 2.32E-11  |           |                 |                                |              |                         |              |
| Politicians-C-Scapegoating | Student's <i>t</i> | 0.3              |           | 541       | 0.764           | 0.04                           | -0.23, 0.32  | 0.03                    | -0.14, 0.19  |
|                            | BF <sub>10</sub>   | 0.0999           | 5.19e0-6  |           |                 |                                |              |                         |              |
| Professors-Scapegoating    | Student's <i>t</i> | 5.187            |           | 540       | < .001          | 0.71                           | 0.44, 0.98   | 0.45                    | 0.27, 0.62   |
|                            | BF <sub>10</sub>   | 35761.0014       | 7.69E-12  |           |                 |                                |              |                         |              |
| Professors-C-Scapegoating  | Student's <i>t</i> | -1.043           |           | 536       | 0.297           | -0.15                          | -0.44, 0.13  | -0.09                   | -0.26, 0.08  |
|                            | BF <sub>10</sub>   | 0.1634           | 2.71e0-6  |           |                 |                                |              |                         |              |
| Referees-Scapegoating      | Student's <i>t</i> | 4.129            |           | 542       | < .001          | 0.56                           | 0.30, 0.83   | 0.35                    | 0.18, 0.52   |
|                            | BF <sub>10</sub>   | 346.5554         | 1.06e0-9  |           |                 |                                |              |                         |              |
| Referees-C-Scapegoating    | Student's <i>t</i> | -1.635           |           | 534       | 0.103           | -0.24                          | -0.53, 0.05  | -0.14                   | -0.31, 0.03  |
|                            | BF <sub>10</sub>   | 0.3526           | 1.23e0-6  |           |                 |                                |              |                         |              |
| Struggle-Scapegoating      | Student's <i>t</i> | -0.375           |           | 541       | 0.708           | -0.06                          | -0.38, 0.26  | -0.03                   | -0.20, 0.14  |
|                            | BF <sub>10</sub>   | 0.1023           | 5.13e0-6  |           |                 |                                |              |                         |              |
| Struggle-C-Scapegoating    | Student's <i>t</i> | -1.621           |           | 535       | 0.106           | -0.24                          | -0.53, 0.05  | -0.14                   | -0.31, 0.03  |
|                            | BF <sub>10</sub>   | 0.3447           | 1.28e0-6  |           |                 |                                |              |                         |              |
| Turnout-Scapegoating       | Student's <i>t</i> | 2.293            |           | 539       | 0.022           | 0.31                           | 0.04, 0.57   | 0.20                    | 0.03, 0.37   |
|                            | BF <sub>10</sub>   | 1.2246           | 3.66e0-7  |           |                 |                                |              |                         |              |
| Turnout-C-Scapegoating     | Student's <i>t</i> | -1.394           |           | 537       | 0.164           | -0.20                          | -0.47, 0.08  | -0.12                   | -0.29, 0.05  |
|                            | BF <sub>10</sub>   | 0.2465           | 1.91e0-6  |           |                 |                                |              |                         |              |

<sup>a</sup> Levene's test is significant ( $p < .05$ ), suggesting a violation of the assumption of equal variances

**Table S16.**

Study 4 (scapegoating): confidence measure item-level results (independent samples and Bayesian *t*-tests). *Note:* Bayesian prior used is 0.707 (representing an 80% chance that the effect size is between -2 and 2). “-C-” denotes a manipulative post’s matched neutral control.

| Confidence               |                    | Statistic   | ±%       | df   | <i>p</i> | $M_{arr}$ | 95%CI       | Cohen's <i>d</i> | 95%CI       |
|--------------------------|--------------------|-------------|----------|------|----------|-----------|-------------|------------------|-------------|
| Manipulative-Confidence  | Student's <i>t</i> | 5.801       |          | 1076 | <.001    | 0.39      | 0.26, 0.52  | 0.35             | 0.23, 0.47  |
|                          | BF <sub>10</sub>   | 874068.0666 | 2.80E-11 |      |          |           |             |                  |             |
| Neutral-Confidence       | Student's <i>t</i> | 1.891       |          | 1077 | 0.059    | 0.13      | -0.01, 0.27 | 0.12             | 0.00, 0.24  |
|                          | BF <sub>10</sub>   | 0.3968      | 8.07e0-5 |      |          |           |             |                  |             |
| Discernment-Confidence   | Student's <i>t</i> | 3.504       |          | 1077 | <.001    | 0.23      | 0.10, 0.36  | 0.21             | 0.09, 0.33  |
|                          | BF <sub>10</sub>   | 28.2131     | 1.05e0-6 |      |          |           |             |                  |             |
| Fiscal-Confidence        | Student's <i>t</i> | 1.008       |          | 537  | 0.314    | 0.12      | -0.11, 0.35 | 0.09             | -0.08, 0.26 |
|                          | BF <sub>10</sub>   | 0.1575      | 2.89e0-6 |      |          |           |             |                  |             |
| Fiscal-C-Confidence      | Student's <i>t</i> | 2.58        |          | 539  | 0.01     | 0.31      | 0.07, 0.55  | 0.22             | 0.05, 0.39  |
|                          | BF <sub>10</sub>   | 2.4092      | 1.73e0-7 |      |          |           |             |                  |             |
| Freewill-Confidence      | Student's <i>t</i> | 4.175       |          | 531  | <.001    | 0.54      | 0.29, 0.80  | 0.36             | 0.19, 0.53  |
|                          | BF <sub>10</sub>   | 416.9552    | 6.84E-10 |      |          |           |             |                  |             |
| Freewill-C-Confidence    | Student's <i>t</i> | 0.755       |          | 545  | 0.451    | 0.10      | -0.17, 0.38 | 0.06             | -0.10, 0.23 |
|                          | BF <sub>10</sub>   | 0.1256      | 4.38e0-6 |      |          |           |             |                  |             |
| Gamers-Confidence        | Student's <i>t</i> | 3.919       |          | 535  | <.001    | 0.50      | 0.25, 0.76  | 0.34             | 0.17, 0.51  |
|                          | BF <sub>10</sub>   | 155.5002    | 2.12e0-9 |      |          |           |             |                  |             |
| Gamers-C-Confidence      | Student's <i>t</i> | 0.147       |          | 541  | 0.884    | 0.02      | -0.23, 0.27 | 0.01             | -0.16, 0.18 |
|                          | BF <sub>10</sub>   | 0.0965      | 5.47e0-6 |      |          |           |             |                  |             |
| Morality-Confidence      | Student's <i>t</i> | 5.792       |          | 538  | <.001    | 0.64      | 0.42, 0.86  | 0.50             | 0.32, 0.67  |
|                          | BF <sub>10</sub>   | 782005.8304 | 3.13E-13 |      |          |           |             |                  |             |
| Morality-C-Confidence    | Student's <i>t</i> | 1.115       |          | 538  | 0.265    | 0.15      | -0.12, 0.42 | 0.10             | -0.07, 0.27 |
|                          | BF <sub>10</sub>   | 0.1753      | 2.77e0-6 |      |          |           |             |                  |             |
| Nuclear-Confidence       | Student's <i>t</i> | 3.514       |          | 543  | <.001    | 0.43      | 0.19, 0.66  | 0.30             | 0.13, 0.47  |
|                          | BF <sub>10</sub>   | 36.9024     | 1.12e0-8 |      |          |           |             |                  |             |
| Nuclear-C-Confidence     | Student's <i>t</i> | 1.212       |          | 533  | 0.226    | 0.16      | -0.10, 0.43 | 0.10             | -0.07, 0.27 |
|                          | BF <sub>10</sub>   | 0.1965      | 2.25e0-6 |      |          |           |             |                  |             |
| Politicians-Confidence   | Student's <i>t</i> | 3.513       |          | 535  | <.001    | 0.42      | 0.19, 0.66  | 0.30             | 0.13, 0.47  |
|                          | BF <sub>10</sub>   | 36.9955     | 9.41e0-9 |      |          |           |             |                  |             |
| Politicians-C-Confidence | Student's <i>t</i> | 1.179       |          | 541  | 0.239    | 0.15      | -0.10, 0.40 | 0.10             | -0.07, 0.27 |
|                          | BF <sub>10</sub>   | 0.1879      | 2.67e0-6 |      |          |           |             |                  |             |
| Professors-Confidence    | Student's <i>t</i> | 4.136       |          | 540  | <.001    | 0.50      | 0.26, 0.74  | 0.36             | 0.18, 0.53  |
|                          | BF <sub>10</sub>   | 356.2412    | 9.39E-10 |      |          |           |             |                  |             |
| Professors-C-Confidence  | Student's <i>t</i> | 0.646       |          | 536  | 0.518    | 0.09      | -0.18, 0.35 | 0.06             | -0.11, 0.23 |
|                          | BF <sub>10</sub>   | 0.1179      | 3.83e0-6 |      |          |           |             |                  |             |
| Referees-Confidence      | Student's <i>t</i> | 4.376       |          | 542  | <.001    | 0.54      | 0.30, 0.78  | 0.38             | 0.20, 0.55  |
|                          | BF <sub>10</sub>   | 934.7601    | 3.78E-10 |      |          |           |             |                  |             |
| Referees-C-Confidence    | Student's <i>t</i> | 0.795       |          | 534  | 0.427    | 0.11      | -0.16, 0.38 | 0.07             | -0.10, 0.24 |
|                          | BF <sub>10</sub>   | 0.1308      | 3.50e0-6 |      |          |           |             |                  |             |
| Struggle-Confidence      | Student's <i>t</i> | 1.243       |          | 541  | 0.215    | 0.17      | -0.10, 0.44 | 0.11             | -0.06, 0.28 |
|                          | BF <sub>10</sub>   | 0.2024      | 2.50e0-6 |      |          |           |             |                  |             |
| Struggle-C-Confidence    | Student's <i>t</i> | 0.353       |          | 535  | 0.724    | 0.05      | -0.21, 0.30 | 0.03             | -0.14, 0.20 |
|                          | BF <sub>10</sub>   | 0.102       | 4.63e0-6 |      |          |           |             |                  |             |
| Turnout-Confidence       | Student's <i>t</i> | 2.587       |          | 539  | 0.01     | 0.31      | 0.07, 0.54  | 0.22             | 0.05, 0.39  |
|                          | BF <sub>10</sub>   | 2.4496      | 1.77e0-7 |      |          |           |             |                  |             |
| Turnout-C-Confidence     | Student's <i>t</i> | 2.033       |          | 537  | 0.043    | 0.26      | 0.01, 0.52  | 0.18             | 0.01, 0.34  |
|                          | BF <sub>10</sub>   | 0.7129      | 6.24e0-7 |      |          |           |             |                  |             |

<sup>a</sup> Levene's test is significant ( $p < .05$ ), suggesting a violation of the assumption of equal variances

**Table S17.**

Study 4 (scapegoating): trustworthiness measure item-level results (independent samples and Bayesian *t*-tests). *Note:* Bayesian prior used is 0.707 (representing an 80% chance that the effect size is between -2 and 2). “-C-“ denotes a manipulative post’s matched neutral control.

| Trustworthiness               |                    | Statistic | ±%       | df   | <i>p</i> | <i>M</i> <sub>diff</sub> | 95%CI        | Cohen's <i>d</i> | 95%CI        |
|-------------------------------|--------------------|-----------|----------|------|----------|--------------------------|--------------|------------------|--------------|
| Manipulative-Trustworthiness  | Student's <i>t</i> | -1.888    |          | 1076 | 0.059    | -0.15                    | -0.31, 0.01  | -0.12            | -0.23, 0.00  |
|                               | BF <sub>10</sub>   | 0.395     | 8.03E-05 |      |          |                          |              |                  |              |
| Neutral-Trustworthiness       | Student's <i>t</i> | -0.463    |          | 1077 | 0.643    | -0.03                    | -0.17, 0.10  | -0.03            | -0.15, 0.09  |
|                               | BF <sub>10</sub>   | 0.0758    | 4.36E-04 |      |          |                          |              |                  |              |
| Discernment-Trustworthiness   | Student's <i>t</i> | 1.6479    |          | 1077 | 0.1      | 0.13                     | -0.02, 0.28  | 0.10             | -0.02, 0.22  |
|                               | BF <sub>10</sub>   | 0.26      | 1.24E-04 |      |          |                          |              |                  |              |
| Fiscal-Trustworthiness        | Student's <i>t</i> | -0.1252   |          | 537  | 0.9      | -0.02                    | -0.30, 0.26  | -0.01            | -0.18, 0.16  |
|                               | BF <sub>10</sub>   | 0.0968    | 4.84E-06 |      |          |                          |              |                  |              |
| Fiscal-C-Trustworthiness      | Student's <i>t</i> | -1.1721   |          | 539  | 0.242    | -0.16                    | -0.42, 0.11  | -0.10            | -0.27, 0.07  |
|                               | BF <sub>10</sub>   | 0.187     | 2.54E-06 |      |          |                          |              |                  |              |
| Freewill-Trustworthiness      | Student's <i>t</i> | -1.804    |          | 531  | 0.072    | -0.26                    | -0.54, 0.02  | -0.16            | -0.33, 0.01  |
|                               | BF <sub>10</sub>   | 0.4682    | 8.65E-07 |      |          |                          |              |                  |              |
| Freewill-C-Trustworthiness    | Student's <i>t</i> | 1.203     |          | 545  | 0.229    | 0.16                     | -0.10, 0.42  | 0.10             | -0.07, 0.27  |
|                               | BF <sub>10</sub>   | 0.1925    | 2.80E-06 |      |          |                          |              |                  |              |
| Gamers-Trustworthiness        | Student's <i>t</i> | -0.4895   |          | 535  | 0.625    | -0.07                    | -0.35, 0.21  | -0.04            | -0.21, 0.13  |
|                               | BF <sub>10</sub>   | 0.1079    | 4.40E-06 |      |          |                          |              |                  |              |
| Gamers-C-Trustworthiness      | Student's <i>t</i> | -0.4869   |          | 541  | 0.627    | -0.06                    | -0.32, 0.19  | -0.04            | -0.21, 0.13  |
|                               | BF <sub>10</sub>   | 0.1072    | 4.89E-06 |      |          |                          |              |                  |              |
| Morality-Trustworthiness      | Student's <i>t</i> | -1.3496   |          | 538  | 0.178    | -0.20                    | -0.50, 0.09  | -0.12            | -0.29, 0.05  |
|                               | BF <sub>10</sub>   | 0.2322    | 2.06E-06 |      |          |                          |              |                  |              |
| Morality-C-Trustworthiness    | Student's <i>t</i> | -0.6229   |          | 538  | 0.534    | -0.09                    | -0.36, 0.19  | -0.05            | -0.22, 0.12  |
|                               | BF <sub>10</sub>   | 0.1157    | 4.30E-06 |      |          |                          |              |                  |              |
| Nuclear-Trustworthiness       | Student's <i>t</i> | -1.5917   |          | 543  | 0.112    | -0.24                    | -0.53, 0.06  | -0.14            | -0.30, 0.03  |
|                               | BF <sub>10</sub>   | 0.3267    | 1.57E-06 |      |          |                          |              |                  |              |
| Nuclear-C-Trustworthiness     | Student's <i>t</i> | -1.1136   |          | 533  | 0.266    | -0.14                    | -0.40, 0.11  | -0.10            | -0.27, 0.07  |
|                               | BF <sub>10</sub>   | 0.1759    | 2.53E-06 |      |          |                          |              |                  |              |
| Politicians-Trustworthiness   | Student's <i>t</i> | -1.3501   |          | 535  | 0.178    | -0.20                    | -0.50, 0.09  | -0.12            | -0.29, 0.05  |
|                               | BF <sub>10</sub>   | 0.2331    | 1.93E-06 |      |          |                          |              |                  |              |
| Politicians-C-Trustworthiness | Student's <i>t</i> | -1.1959   |          | 541  | 0.232    | -0.15                    | -0.40, 0.10  | -0.10            | -0.27, 0.07  |
|                               | BF <sub>10</sub>   | 0.1917    | 2.62E-06 |      |          |                          |              |                  |              |
| Professors-Trustworthiness    | Student's <i>t</i> | -1.9394   |          | 540  | 0.053    | -0.27                    | -0.54, 0.00  | -0.17            | -0.34, 0.00  |
|                               | BF <sub>10</sub>   | 0.5953    | 7.59E-07 |      |          |                          |              |                  |              |
| Professors-C-Trustworthiness  | Student's <i>t</i> | -0.0308   |          | 536  | 0.975    | 0.00                     | -0.26, 0.25  | 0.00             | -0.17, 0.17  |
|                               | BF <sub>10</sub>   | 0.0963    | 4.74E-06 |      |          |                          |              |                  |              |
| Referees-Trustworthiness      | Student's <i>t</i> | -1.8168   |          | 542  | 0.07     | -0.25                    | -0.51, 0.02  | -0.16            | -0.32, 0.01  |
|                               | BF <sub>10</sub>   | 0.4745    | 1.04E-06 |      |          |                          |              |                  |              |
| Referees-C-Trustworthiness    | Student's <i>t</i> | 0.2698    |          | 534  | 0.787    | 0.03                     | -0.21, 0.28  | 0.02             | -0.15, 0.19  |
|                               | BF <sub>10</sub>   | 0.0996    | 4.67E-06 |      |          |                          |              |                  |              |
| Struggle-Trustworthiness      | Student's <i>t</i> | -2.5026   |          | 541  | 0.013    | -0.36                    | -0.64, -0.08 | -0.21            | -0.38, -0.05 |
|                               | BF <sub>10</sub>   | 1.9891    | 2.28E-07 |      |          |                          |              |                  |              |
| Struggle-C-Trustworthiness    | Student's <i>t</i> | 1.605     |          | 535  | 0.109    | 0.21                     | -0.05, 0.48  | 0.14             | -0.03, 0.31  |
|                               | BF <sub>10</sub>   | 0.3359    | 1.32E-06 |      |          |                          |              |                  |              |
| Turnout-Trustworthiness       | Student's <i>t</i> | 1.333     |          | 539  | 0.183    | 0.20                     | -0.09, 0.50  | 0.11             | -0.05, 0.28  |
|                               | BF <sub>10</sub>   | 0.227     | 2.15E-06 |      |          |                          |              |                  |              |
| Turnout-C-Trustworthiness     | Student's <i>t</i> | 0.2388    |          | 537  | 0.811    | 0.03                     | -0.22, 0.28  | 0.02             | -0.15, 0.19  |
|                               | BF <sub>10</sub>   | 0.0985    | 5.01E-06 |      |          |                          |              |                  |              |

<sup>a</sup> Levene's test is significant ( $p < .05$ ), suggesting a violation of the assumption of equal variances

**Table S18.**

Study 4 (scapegoating): sharing intentions measure item-level results (independent samples and Bayesian *t*-tests). *Note:* Bayesian prior used is 0.707 (representing an 80% chance that the effect size is between -2 and 2). “-C-“ denotes a manipulative post’s matched neutral control.

| Sharing               |                    | Statistic | ±%       | df   | <i>p</i> | <i>M</i> <sub>diff</sub> | 95%CI       | Cohen's <i>d</i> | 95%CI       |
|-----------------------|--------------------|-----------|----------|------|----------|--------------------------|-------------|------------------|-------------|
| Manipulative-Sharing  | Student's <i>t</i> | -0.479    |          | 1076 | 0.632    | -0.04                    | -0.21, 0.13 | -0.03            | -0.15, 0.09 |
|                       | BF <sub>10</sub>   | 0.0764    | 4.29E-04 |      |          |                          |             |                  |             |
| Neutral-Sharing       | Student's <i>t</i> | 0.758     |          | 1077 | 0.449    | 0.07                     | -0.11, 0.25 | 0.05             | -0.07, 0.17 |
|                       | BF <sub>10</sub>   | 0.0906    | 3.64E-04 |      |          |                          |             |                  |             |
| Discernment-Sharing   | Student's <i>t</i> | 1.834     |          | 1077 | 0.067    | 0.12                     | -0.01, 0.25 | 0.11             | -0.01, 0.23 |
|                       | BF <sub>10</sub>   | 0.3579    | 8.97E-05 |      |          |                          |             |                  |             |
| Fiscal-Sharing        | Student's <i>t</i> | -0.397    |          | 537  | 0.691    | -0.05                    | -0.32, 0.21 | -0.03            | -0.20, 0.14 |
|                       | BF <sub>10</sub>   | 0.1038    | 4.50E-06 |      |          |                          |             |                  |             |
| Fiscal-C-Sharing      | Student's <i>t</i> | -0.813    |          | 539  | 0.416    | -0.12                    | -0.42, 0.17 | -0.07            | -0.24, 0.10 |
|                       | BF <sub>10</sub>   | 0.1323    | 3.66E-06 |      |          |                          |             |                  |             |
| Freewill-Sharing      | Student's <i>t</i> | -1.153    |          | 531  | 0.25     | -0.16                    | -0.43, 0.11 | -0.10            | -0.27, 0.07 |
|                       | BF <sub>10</sub>   | 0.1839    | 2.32E-06 |      |          |                          |             |                  |             |
| Freewill-C-Sharing    | Student's <i>t</i> | 1.997     |          | 545  | 0.046    | 0.32                     | 0.01, 0.64  | 0.17             | 0.00, 0.34  |
|                       | BF <sub>10</sub>   | 0.6607    | 7.68E-07 |      |          |                          |             |                  |             |
| Gamers-Sharing        | Student's <i>t</i> | 0.653     |          | 535  | 0.514    | 0.09                     | -0.19, 0.37 | 0.06             | -0.11, 0.23 |
|                       | BF <sub>10</sub>   | 0.1182    | 4.00E-06 |      |          |                          |             |                  |             |
| Gamers-C-Sharing      | Student's <i>t</i> | 0.122     |          | 541  | 0.903    | 0.02                     | -0.29, 0.33 | 0.01             | -0.16, 0.18 |
|                       | BF <sub>10</sub>   | 0.0962    | 5.48E-06 |      |          |                          |             |                  |             |
| Morality-Sharing      | Student's <i>t</i> | -0.632    |          | 538  | 0.528    | -0.09                    | -0.37, 0.19 | -0.05            | -0.22, 0.11 |
|                       | BF <sub>10</sub>   | 0.1163    | 4.26E-06 |      |          |                          |             |                  |             |
| Morality-C-Sharing    | Student's <i>t</i> | -0.106    |          | 538  | 0.916    | -0.02                    | -0.32, 0.29 | -0.01            | -0.18, 0.16 |
|                       | BF <sub>10</sub>   | 0.0963    | 5.22E-06 |      |          |                          |             |                  |             |
| Nuclear-Sharing       | Student's <i>t</i> | -0.755    |          | 543  | 0.451    | -0.11                    | -0.40, 0.18 | -0.06            | -0.23, 0.10 |
|                       | BF <sub>10</sub>   | 0.1258    | 4.27E-06 |      |          |                          |             |                  |             |
| Nuclear-C-Sharing     | Student's <i>t</i> | -0.267    |          | 533  | 0.79     | -0.04                    | -0.35, 0.26 | -0.02            | -0.19, 0.15 |
|                       | BF <sub>10</sub>   | 0.0996    | 4.61E-06 |      |          |                          |             |                  |             |
| Politicians-Sharing   | Student's <i>t</i> | -1.45     |          | 535  | 0.148    | -0.23                    | -0.55, 0.08 | -0.13            | -0.29, 0.04 |
|                       | BF <sub>10</sub>   | 0.2669    | 1.68E-06 |      |          |                          |             |                  |             |
| Politicians-C-Sharing | Student's <i>t</i> | 0.447     |          | 541  | 0.655    | 0.07                     | -0.25, 0.40 | 0.04             | -0.13, 0.21 |
|                       | BF <sub>10</sub>   | 0.1053    | 4.91E-06 |      |          |                          |             |                  |             |
| Professors-Sharing    | Student's <i>t</i> | -0.216    |          | 540  | 0.829    | -0.03                    | -0.31, 0.24 | -0.02            | -0.19, 0.15 |
|                       | BF <sub>10</sub>   | 0.098     | 5.07E-06 |      |          |                          |             |                  |             |
| Professors-C-Sharing  | Student's <i>t</i> | 0.125     |          | 536  | 0.901    | 0.02                     | -0.30, 0.34 | 0.01             | -0.16, 0.18 |
|                       | BF <sub>10</sub>   | 0.097     | 4.71E-06 |      |          |                          |             |                  |             |
| Referees-Sharing      | Student's <i>t</i> | -0.645    |          | 542  | 0.519    | -0.09                    | -0.38, 0.19 | -0.06            | -0.22, 0.11 |
|                       | BF <sub>10</sub>   | 0.1169    | 4.53E-06 |      |          |                          |             |                  |             |
| Referees-C-Sharing    | Student's <i>t</i> | 1.383     |          | 534  | 0.167    | 0.21                     | -0.09, 0.50 | 0.12             | -0.05, 0.29 |
|                       | BF <sub>10</sub>   | 0.2435    | 1.82E-06 |      |          |                          |             |                  |             |
| Struggle-Sharing      | Student's <i>t</i> | -1.262    |          | 541  | 0.208    | -0.17                    | -0.44, 0.09 | -0.11            | -0.28, 0.06 |
|                       | BF <sub>10</sub>   | 0.2073    | 2.44E-06 |      |          |                          |             |                  |             |
| Struggle-C-Sharing    | Student's <i>t</i> | 1.978     |          | 535  | 0.048    | 0.33                     | 0.00, 0.65  | 0.17             | 0.00, 0.34  |
|                       | BF <sub>10</sub>   | 0.6424    | 6.66E-07 |      |          |                          |             |                  |             |
| Turnout-Sharing       | Student's <i>t</i> | 1.635     |          | 539  | 0.103    | 0.25                     | -0.05, 0.54 | 0.14             | -0.03, 0.31 |
|                       | BF <sub>10</sub>   | 0.3509    | 1.36E-06 |      |          |                          |             |                  |             |
| Turnout-C-Sharing     | Student's <i>t</i> | -0.674    |          | 537  | 0.5      | -0.11                    | -0.42, 0.21 | -0.06            | -0.23, 0.11 |
|                       | BF <sub>10</sub>   | 0.1196    | 4.08E-06 |      |          |                          |             |                  |             |

<sup>a</sup> Levene's test is significant ( $p < .05$ ), suggesting a violation of the assumption of equal variances

**Table S19.**

Study 5 (ad hominem): technique recognition measure item-level results (independent samples and Bayesian *t*-tests). *Note:* Bayesian prior used is 0.707 (representing an 80% chance that the effect size is between -2 and 2). “-C-“ denotes a manipulative post’s matched neutral control.

| Ad hominem               |                    | Statistic  | ±%       | df   | <i>p</i> | <i>M</i> <sub>diff</sub> | 95%CI        | Cohen's <i>d</i> | 95%CI        |
|--------------------------|--------------------|------------|----------|------|----------|--------------------------|--------------|------------------|--------------|
| Manipulative-AdHominem   | Student's <i>t</i> | 3.1577     |          | 1079 | 0.002    | 0.23                     | 0.09, 0.37   | 0.19             | 0.07, 0.31   |
|                          | BF <sub>10</sub>   | 9.1358     | 3.37e0-6 |      |          |                          |              |                  |              |
| Neutral-AdHominem        | Student's <i>t</i> | -7.3523    |          | 1079 | <.001    | -0.54                    | -0.68, -0.39 | -0.45            | -0.57, -0.32 |
|                          | BF <sub>10</sub>   | 1.43E+10   | 1.52E-15 |      |          |                          |              |                  |              |
| Discernment-AdHominem    | Student's <i>t</i> | 7.3603     |          | 1079 | <.001    | 0.76                     | 0.56, 0.96   | 0.45             | 0.33, 0.57   |
|                          | BF <sub>10</sub>   | 1.51E+10   | 1.43E-15 |      |          |                          |              |                  |              |
| Academia-AdHominem       | Student's <i>t</i> | 4.4393     |          | 536  | <.001    | 0.58                     | 0.32, 0.84   | 0.38             | 0.21, 0.55   |
|                          | BF <sub>10</sub>   | 1220.0418  | 2.50E-10 |      |          |                          |              |                  |              |
| Academia-C-AdHominem     | Student's <i>t</i> | -4.739     |          | 543  | <.001    | -0.75                    | -1.06, -0.44 | -0.41            | -0.58, -0.23 |
|                          | BF <sub>10</sub>   | 4456.0114  | 7.49E-11 |      |          |                          |              |                  |              |
| Crime-AdHominem          | Student's <i>t</i> | -2.5525    |          | 542  | 0.011    | -0.39                    | -0.70, -0.09 | -0.22            | -0.39, -0.05 |
|                          | BF <sub>10</sub>   | 2.2459     | 2.01e0-7 |      |          |                          |              |                  |              |
| Crime-C-AdHominem        | Student's <i>t</i> | -5.4475    |          | 537  | <.001    | -0.87                    | -1.18, -0.55 | -0.47            | -0.64, -0.30 |
|                          | BF <sub>10</sub>   | 129952.599 | 1.97E-12 |      |          |                          |              |                  |              |
| Dumped-AdHominem         | Student's <i>t</i> | 1.2617     |          | 542  | 0.208    | 0.17                     | -0.10, 0.44  | 0.11             | -0.06, 0.28  |
|                          | BF <sub>10</sub>   | 0.2071     | 2.47e0-6 |      |          |                          |              |                  |              |
| Dumped-C-AdHominem       | Student's <i>t</i> | -2.4763    |          | 537  | 0.014    | -0.36                    | -0.65, -0.08 | -0.21            | -0.38, -0.04 |
|                          | BF <sub>10</sub>   | 1.8745     | 2.20e0-7 |      |          |                          |              |                  |              |
| Education-AdHominem      | Student's <i>t</i> | 2.489      |          | 537  | 0.013    | 0.34                     | 0.07, 0.61   | 0.21             | 0.04, 0.38   |
|                          | BF <sub>10</sub>   | 1.9305     | 2.18e0-7 |      |          |                          |              |                  |              |
| Education-C-AdHominem    | Student's <i>t</i> | -3.3545    |          | 542  | <.001    | -0.48                    | -0.76, -0.20 | -0.29            | -0.46, -0.12 |
|                          | BF <sub>10</sub>   | 21.8608    | 1.90e0-8 |      |          |                          |              |                  |              |
| Fired-AdHominem          | Student's <i>t</i> | 1.8518     |          | 540  | 0.065    | 0.25                     | -0.02, 0.51  | 0.16             | -0.01, 0.33  |
|                          | BF <sub>10</sub>   | 0.507      | 8.89e0-7 |      |          |                          |              |                  |              |
| Fired-C-AdHominem        | Student's <i>t</i> | -3.6584    |          | 539  | <.001    | -0.57                    | -0.88, -0.26 | -0.32            | -0.49, -0.14 |
|                          | BF <sub>10</sub>   | 60.6879    | 5.95e0-9 |      |          |                          |              |                  |              |
| Freud-AdHominem          | Student's <i>t</i> | 1.1091     |          | 540  | 0.268    | 0.16                     | -0.12, 0.44  | 0.10             | -0.07, 0.26  |
|                          | BF <sub>10</sub>   | 0.1741     | 2.83e0-6 |      |          |                          |              |                  |              |
| Freud-C-AdHominem        | Student's <i>t</i> | -4.1693    |          | 539  | <.001    | -0.67                    | -0.99, -0.36 | -0.36            | -0.53, -0.19 |
|                          | BF <sub>10</sub>   | 406.0377   | 8.41E-10 |      |          |                          |              |                  |              |
| Heartland-AdHominem      | Student's <i>t</i> | 3.4483     |          | 540  | <.001    | 0.45                     | 0.19, 0.71   | 0.30             | 0.13, 0.47   |
|                          | BF <sub>10</sub>   | 29.7023    | 1.32e0-8 |      |          |                          |              |                  |              |
| Heartland-C-AdHominem    | Student's <i>t</i> | -0.6682    |          | 539  | 0.504    | -0.10                    | -0.40, 0.20  | -0.06            | -0.23, 0.11  |
|                          | BF <sub>10</sub>   | 0.1189     | 4.25e0-6 |      |          |                          |              |                  |              |
| Marriage-AdHominem       | Student's <i>t</i> | 2.8661     |          | 543  | 0.004    | 0.40                     | 0.13, 0.68   | 0.25             | 0.08, 0.41   |
|                          | BF <sub>10</sub>   | 5.0845     | 8.84e0-8 |      |          |                          |              |                  |              |
| Marriage-C-AdHominem     | Student's <i>t</i> | -2.835     |          | 536  | 0.005    | -0.44                    | -0.75, -0.14 | -0.24            | -0.41, -0.07 |
|                          | BF <sub>10</sub>   | 4.6905     | 8.46e0-8 |      |          |                          |              |                  |              |
| Presidential-AdHominem   | Student's <i>t</i> | 3.0642     |          | 535  | 0.002    | 0.46                     | 0.17, 0.76   | 0.26             | 0.09, 0.44   |
|                          | BF <sub>10</sub>   | 8.9888     | 4.18e0-8 |      |          |                          |              |                  |              |
| Presidential-C-AdHominem | Student's <i>t</i> | -1.4597    |          | 544  | 0.145    | -0.22                    | -0.51, 0.08  | -0.13            | -0.29, 0.04  |
|                          | BF <sub>10</sub>   | 0.2687     | 1.93e0-6 |      |          |                          |              |                  |              |
| Twitterbio-AdHominem     | Student's <i>t</i> | 0.0518     |          | 539  | 0.959    | 0.01                     | -0.28, 0.30  | 0.00             | -0.16, 0.17  |
|                          | BF <sub>10</sub>   | 0.0959     | 5.21e0-6 |      |          |                          |              |                  |              |
| Twitterbio-C-AdHominem   | Student's <i>t</i> | -4.0019    |          | 540  | <.001    | -0.62                    | -0.92, -0.31 | -0.34            | -0.51, -0.17 |
|                          | BF <sub>10</sub>   | 212.0356   | 1.69e0-9 |      |          |                          |              |                  |              |

<sup>a</sup> Levene's test is significant ( $p < .05$ ), suggesting a violation of the assumption of equal variances



**Table S20.**

Study 5 (ad hominem): confidence measure item-level results (independent samples and Bayesian *t*-tests). *Note:* Bayesian prior used is 0.707 (representing an 80% chance that the effect size is between -2 and 2). “-C-” denotes a manipulative post’s matched neutral control.

| Confidence                |                    | Statistic | ±%       | df   | <i>p</i> | $M_{diff}$ | 95%CI        | Cohen's <i>d</i> | 95%CI        |
|---------------------------|--------------------|-----------|----------|------|----------|------------|--------------|------------------|--------------|
| Manipulative-Confidence   | Student's <i>t</i> | 4.0087    |          | 1079 | < .001   | 0.31       | 0.16, 0.46   | 0.24             | 0.12, 0.36   |
|                           | BF <sub>10</sub>   | 179.0774  | 1.63e0-7 |      |          |            |              |                  |              |
| Neutral-Confidence        | Student's <i>t</i> | 5.9184    |          | 1079 | < .001   | 0.44       | 0.30, 0.59   | 0.36             | 0.24, 0.48   |
|                           | BF <sub>10</sub>   | 1.69E+06  | 1.48E-11 |      |          |            |              |                  |              |
| Discernment-Confidence    | Student's <i>t</i> | -2.1449   |          | 1079 | 0.032    | -0.14      | -0.26, -0.01 | -0.13            | -0.25, -0.01 |
|                           | BF <sub>10</sub>   | 0.6566    | 4.92e0-5 |      |          |            |              |                  |              |
| Academia-Confidence       | Student's <i>t</i> | 2.9467    |          | 536  | 0.003    | 0.40       | 0.13, 0.66   | 0.25             | 0.08, 0.42   |
|                           | BF <sub>10</sub>   | 6.3997    | 6.08e0-8 |      |          |            |              |                  |              |
| Academia-C-Confidence     | Student's <i>t</i> | 4.4111    |          | 543  | < .001   | 0.64       | 0.36, 0.93   | 0.38             | 0.21, 0.55   |
|                           | BF <sub>10</sub>   | 1082.9442 | 3.26E-10 |      |          |            |              |                  |              |
| Crime-Confidence          | Student's <i>t</i> | 0.3874    |          | 542  | 0.699    | 0.05       | -0.20, 0.29  | 0.03             | -0.14, 0.20  |
|                           | BF <sub>10</sub>   | 0.1027    | 5.13e0-6 |      |          |            |              |                  |              |
| Crime-C-Confidence        | Student's <i>t</i> | 4.4962    |          | 537  | < .001   | 0.65       | 0.36, 0.93   | 0.39             | 0.22, 0.56   |
|                           | BF <sub>10</sub>   | 1550.3363 | 2.00E-10 |      |          |            |              |                  |              |
| Dumped-Confidence         | Student's <i>t</i> | 2.328     |          | 542  | 0.02     | 0.31       | 0.05, 0.58   | 0.20             | 0.03, 0.37   |
|                           | BF <sub>10</sub>   | 1.3232    | 3.53e0-7 |      |          |            |              |                  |              |
| Dumped-C-Confidence       | Student's <i>t</i> | 1.8418    |          | 537  | 0.066    | 0.26       | -0.02, 0.53  | 0.16             | -0.01, 0.33  |
|                           | BF <sub>10</sub>   | 0.4985    | 8.87e0-7 |      |          |            |              |                  |              |
| Education-Confidence      | Student's <i>t</i> | 2.2162    |          | 537  | 0.027    | 0.29       | 0.03, 0.56   | 0.19             | 0.02, 0.36   |
|                           | BF <sub>10</sub>   | 1.0387    | 4.19e0-7 |      |          |            |              |                  |              |
| Education-C-Confidence    | Student's <i>t</i> | 4.4996    |          | 542  | < .001   | 0.67       | 0.38, 0.96   | 0.39             | 0.21, 0.56   |
|                           | BF <sub>10</sub>   | 1571.25   | 2.21E-10 |      |          |            |              |                  |              |
| Fired-Confidence          | Student's <i>t</i> | 0.8065    |          | 540  | 0.42     | 0.11       | -0.16, 0.38  | 0.07             | -0.10, 0.24  |
|                           | BF <sub>10</sub>   | 0.1316    | 3.68e0-6 |      |          |            |              |                  |              |
| Fired-C-Confidence        | Student's <i>t</i> | 3.0262    |          | 539  | 0.003    | 0.41       | 0.14, 0.67   | 0.26             | 0.09, 0.43   |
|                           | BF <sub>10</sub>   | 8.0322    | 4.93e0-8 |      |          |            |              |                  |              |
| Freud-Confidence          | Student's <i>t</i> | 0.784     |          | 540  | 0.433    | 0.11       | -0.17, 0.39  | 0.07             | -0.10, 0.24  |
|                           | BF <sub>10</sub>   | 0.1291    | 3.88e0-6 |      |          |            |              |                  |              |
| Freud-C-Confidence        | Student's <i>t</i> | 3.2223    |          | 539  | 0.001    | 0.43       | 0.17, 0.69   | 0.28             | 0.11, 0.45   |
|                           | BF <sub>10</sub>   | 14.4419   | 2.74e0-8 |      |          |            |              |                  |              |
| Heartland-Confidence      | Student's <i>t</i> | 4.1071    |          | 540  | < .001   | 0.55       | 0.29, 0.82   | 0.35             | 0.18, 0.52   |
|                           | BF <sub>10</sub>   | 317.8889  | 1.11e0-9 |      |          |            |              |                  |              |
| Heartland-C-Confidence    | Student's <i>t</i> | 0.0574    |          | 539  | 0.954    | 0.01       | -0.25, 0.27  | 0.00             | -0.16, 0.17  |
|                           | BF <sub>10</sub>   | 0.0958    | 5.33e0-6 |      |          |            |              |                  |              |
| Marriage-Confidence       | Student's <i>t</i> | 2.1216    |          | 543  | 0.034    | 0.29       | 0.02, 0.55   | 0.18             | 0.01, 0.35   |
|                           | BF <sub>10</sub>   | 0.8479    | 5.76e0-7 |      |          |            |              |                  |              |
| Marriage-C-Confidence     | Student's <i>t</i> | 2.568     |          | 536  | 0.01     | 0.36       | 0.09, 0.64   | 0.22             | 0.05, 0.39   |
|                           | BF <sub>10</sub>   | 2.3423    | 1.75e0-7 |      |          |            |              |                  |              |
| Presidential-Confidence   | Student's <i>t</i> | 3.9868    |          | 535  | < .001   | 0.56       | 0.28, 0.84   | 0.34             | 0.17, 0.52   |
|                           | BF <sub>10</sub>   | 200.6357  | 1.62e0-9 |      |          |            |              |                  |              |
| Presidential-C-Confidence | Student's <i>t</i> | 0.7912    |          | 544  | 0.429    | 0.10       | -0.15, 0.36  | 0.07             | -0.10, 0.24  |
|                           | BF <sub>10</sub>   | 0.1293    | 4.16e0-6 |      |          |            |              |                  |              |
| Twitterbio-Confidence     | Student's <i>t</i> | 1.5773    |          | 539  | 0.115    | 0.21       | -0.05, 0.47  | 0.14             | -0.03, 0.30  |
|                           | BF <sub>10</sub>   | 0.321     | 1.46e0-6 |      |          |            |              |                  |              |
| Twitterbio-C-Confidence   | Student's <i>t</i> | 4.3092    |          | 540  | < .001   | 0.62       | 0.34, 0.90   | 0.37             | 0.20, 0.54   |
|                           | BF <sub>10</sub>   | 711.8482  | 4.78E-10 |      |          |            |              |                  |              |

<sup>a</sup> Levene's test is significant ( $p < .05$ ), suggesting a violation of the assumption of equal variances

**Table S21.**

Study 5 (ad hominem): trustworthiness measure item-level results (independent samples and Bayesian *t*-tests). *Note:* Bayesian prior used is 0.707 (representing an 80% chance that the effect size is between -2 and 2). “-C-“ denotes a manipulative post’s matched neutral control.

| Trustworthiness                |                    | Statistic | ±%       | df   | <i>p</i> | <i>M</i> <sub>diff</sub> | 95%CI        | Cohen's <i>d</i> | 95%CI        |
|--------------------------------|--------------------|-----------|----------|------|----------|--------------------------|--------------|------------------|--------------|
| Manipulative-Trustworthiness   | Student's <i>t</i> | -1.752    |          | 1079 | 0.08     | -0.13                    | -0.28, 0.02  | -0.11            | -0.23, 0.01  |
|                                | BF <sub>10</sub>   | 0.3094    | 1.06E-04 |      |          |                          |              |                  |              |
| Neutral-Trustworthiness        | Student's <i>t</i> | 1.411     |          | 1079 | 0.158    | 0.10                     | -0.04, 0.23  | 0.09             | -0.03, 0.21  |
|                                | BF <sub>10</sub>   | 0.1819    | 1.82E-04 |      |          |                          |              |                  |              |
| Discernment-Trustworthiness    | Student's <i>t</i> | 3.145     |          | 1079 | 0.002    | 0.22                     | 0.08, 0.36   | 0.19             | 0.07, 0.31   |
|                                | BF <sub>10</sub>   | 8.7818    | 3.50E-06 |      |          |                          |              |                  |              |
| Academia-Trustworthiness       | Student's <i>t</i> | -1.885    |          | 536  | 0.06     | -0.25                    | -0.50, 0.01  | -0.16            | -0.33, 0.01  |
|                                | BF <sub>10</sub>   | 0.5389    | 8.18E-07 |      |          |                          |              |                  |              |
| Academia-C-Trustworthiness     | Student's <i>t</i> | 0.882     |          | 543  | 0.378    | 0.12                     | -0.15, 0.40  | 0.08             | -0.09, 0.24  |
|                                | BF <sub>10</sub>   | 0.1394    | 3.78E-06 |      |          |                          |              |                  |              |
| Crime-Trustworthiness          | Student's <i>t</i> | -1.087    |          | 542  | 0.277    | -0.14                    | -0.40, 0.11  | -0.09            | -0.26, 0.08  |
|                                | BF <sub>10</sub>   | 0.1697    | 3.02E-06 |      |          |                          |              |                  |              |
| Crime-C-Trustworthiness        | Student's <i>t</i> | 1.697     |          | 537  | 0.09     | 0.22                     | -0.04, 0.48  | 0.15             | -0.02, 0.32  |
|                                | BF <sub>10</sub>   | 0.3887    | 1.18E-06 |      |          |                          |              |                  |              |
| Dumped-Trustworthiness         | Student's <i>t</i> | -0.63     |          | 542  | 0.529    | -0.08                    | -0.34, 0.18  | -0.05            | -0.22, 0.11  |
|                                | BF <sub>10</sub>   | 0.1158    | 4.55E-06 |      |          |                          |              |                  |              |
| Dumped-C-Trustworthiness       | Student's <i>t</i> | 1.929     |          | 537  | 0.054    | 0.24                     | 0.00, 0.49   | 0.17             | 0.00, 0.34   |
|                                | BF <sub>10</sub>   | 0.5844    | 7.50E-07 |      |          |                          |              |                  |              |
| Education-Trustworthiness      | Student's <i>t</i> | -1.37     |          | 537  | 0.171    | -0.18                    | -0.44, 0.08  | -0.12            | -0.29, 0.05  |
|                                | BF <sub>10</sub>   | 0.2388    | 1.97E-06 |      |          |                          |              |                  |              |
| Education-C-Trustworthiness    | Student's <i>t</i> | 1.438     |          | 542  | 0.151    | 0.17                     | -0.06, 0.40  | 0.12             | -0.05, 0.29  |
|                                | BF <sub>10</sub>   | 0.261     | 1.95E-06 |      |          |                          |              |                  |              |
| Fired-Trustworthiness          | Student's <i>t</i> | -1.414    |          | 540  | 0.158    | -0.17                    | -0.41, 0.07  | -0.12            | -0.29, 0.05  |
|                                | BF <sub>10</sub>   | 0.2536    | 1.84E-06 |      |          |                          |              |                  |              |
| Fired-C-Trustworthiness        | Student's <i>t</i> | -0.676    |          | 539  | 0.499    | -0.10                    | -0.38, 0.18  | -0.06            | -0.23, 0.11  |
|                                | BF <sub>10</sub>   | 0.1197    | 4.10E-06 |      |          |                          |              |                  |              |
| Freud-Trustworthiness          | Student's <i>t</i> | -0.452    |          | 540  | 0.652    | -0.06                    | -0.32, 0.20  | -0.04            | -0.21, 0.13  |
|                                | BF <sub>10</sub>   | 0.1057    | 4.79E-06 |      |          |                          |              |                  |              |
| Freud-C-Trustworthiness        | Student's <i>t</i> | 0.919     |          | 539  | 0.358    | 0.12                     | -0.14, 0.38  | 0.08             | -0.09, 0.25  |
|                                | BF <sub>10</sub>   | 0.1444    | 3.44E-06 |      |          |                          |              |                  |              |
| Heartland-Trustworthiness      | Student's <i>t</i> | -1.54     |          | 540  | 0.124    | -0.20                    | -0.46, 0.06  | -0.13            | -0.30, 0.04  |
|                                | BF <sub>10</sub>   | 0.303     | 1.61E-06 |      |          |                          |              |                  |              |
| Heartland-C-Trustworthiness    | Student's <i>t</i> | -1.743    |          | 539  | 0.082    | -0.23                    | -0.49, 0.03  | -0.15            | -0.32, 0.02  |
|                                | BF <sub>10</sub>   | 0.419     | 1.13E-06 |      |          |                          |              |                  |              |
| Marriage-Trustworthiness       | Student's <i>t</i> | -1.172    |          | 543  | 0.242    | -0.17                    | -0.45, 0.11  | -0.10            | -0.27, 0.07  |
|                                | BF <sub>10</sub>   | 0.1859    | 2.83E-06 |      |          |                          |              |                  |              |
| Marriage-C-Trustworthiness     | Student's <i>t</i> | -0.14     |          | 536  | 0.888    | -0.02                    | -0.29, 0.25  | -0.01            | -0.18, 0.16  |
|                                | BF <sub>10</sub>   | 0.0968    | 5.02E-06 |      |          |                          |              |                  |              |
| Presidential-Trustworthiness   | Student's <i>t</i> | -2.146    |          | 535  | 0.032    | -0.29                    | -0.55, -0.02 | -0.19            | -0.36, -0.02 |
|                                | BF <sub>10</sub>   | 0.8981    | 4.70E-07 |      |          |                          |              |                  |              |
| Presidential-C-Trustworthiness | Student's <i>t</i> | 0.85      |          | 544  | 0.396    | 0.11                     | -0.15, 0.37  | 0.07             | -0.10, 0.24  |
|                                | BF <sub>10</sub>   | 0.1355    | 3.96E-06 |      |          |                          |              |                  |              |
| Twitterbio-Trustworthiness     | Student's <i>t</i> | 0.307     |          | 539  | 0.759    | 0.04                     | -0.22, 0.30  | 0.03             | -0.14, 0.20  |
|                                | BF <sub>10</sub>   | 0.1003    | 4.97E-06 |      |          |                          |              |                  |              |
| Twitterbio-C-Trustworthiness   | Student's <i>t</i> | 1.869     |          | 540  | 0.062    | 0.26                     | -0.01, 0.53  | 0.16             | -0.01, 0.33  |
|                                | BF <sub>10</sub>   | 0.5219    | 9.05E-07 |      |          |                          |              |                  |              |

<sup>a</sup> Levene's test is significant ( $p < .05$ ), suggesting a violation of the assumption of equal variances

**Table S22.**

Study 5 (ad hominem): sharing measure item-level results (independent samples and Bayesian *t*-tests). *Note:* Bayesian prior used is 0.707 (representing an 80% chance that the effect size is between -2 and 2). “-C-“ denotes a manipulative post’s matched neutral control.

| Sharing                |                    | Statistic | ±%       | df   | <i>p</i> | <i>M</i> <sub>diff</sub> | 95%CI        | Cohen's <i>d</i> | 95%CI        |
|------------------------|--------------------|-----------|----------|------|----------|--------------------------|--------------|------------------|--------------|
| Manipulative-Sharing   | Student's <i>t</i> | -1.8785   |          | 1079 | 0.061    | -0.15                    | -0.30, 0.01  | -0.11            | -0.23, 0.01  |
|                        | BF <sub>10</sub>   | 0.3876    | 8.41E-05 |      |          |                          |              |                  |              |
| Neutral-Sharing        | Student's <i>t</i> | 0.6023    |          | 1079 | 0.547    | 0.05                     | -0.12, 0.22  | 0.04             | -0.08, 0.16  |
|                        | BF <sub>10</sub>   | 0.0815    | 4.13E-04 |      |          |                          |              |                  |              |
| Discernment-Sharing    | Student's <i>t</i> | 3.1907    |          | 1079 | 0.001    | 0.20                     | 0.08, 0.32   | 0.19             | 0.07, 0.31   |
|                        | BF <sub>10</sub>   | 10.1227   | 3.03E-06 |      |          |                          |              |                  |              |
| Academia-Sharing       | Student's <i>t</i> | -2.0655   |          | 536  | 0.039    | -0.25                    | -0.49, -0.01 | -0.18            | -0.35, -0.01 |
|                        | BF <sub>10</sub>   | 0.761     | 5.69E-07 |      |          |                          |              |                  |              |
| Academia-C-Sharing     | Student's <i>t</i> | -0.1042   |          | 543  | 0.917    | -0.02                    | -0.36, 0.32  | -0.01            | -0.18, 0.16  |
|                        | BF <sub>10</sub>   | 0.0959    | 5.59E-06 |      |          |                          |              |                  |              |
| Crime-Sharing          | Student's <i>t</i> | -1.7067   |          | 542  | 0.088    | -0.24                    | -0.51, 0.04  | -0.15            | -0.31, 0.02  |
|                        | BF <sub>10</sub>   | 0.3934    | 1.25E-06 |      |          |                          |              |                  |              |
| Crime-C-Sharing        | Student's <i>t</i> | 1.9234    |          | 537  | 0.055    | 0.28                     | -0.01, 0.56  | 0.17             | 0.00, 0.34   |
|                        | BF <sub>10</sub>   | 0.578     | 7.75E-07 |      |          |                          |              |                  |              |
| Dumped-Sharing         | Student's <i>t</i> | -0.817    |          | 542  | 0.414    | -0.10                    | -0.34, 0.14  | -0.07            | -0.24, 0.10  |
|                        | BF <sub>10</sub>   | 0.1321    | 3.96E-06 |      |          |                          |              |                  |              |
| Dumped-C-Sharing       | Student's <i>t</i> | 0.1199    |          | 537  | 0.905    | 0.02                     | -0.30, 0.34  | 0.01             | -0.16, 0.18  |
|                        | BF <sub>10</sub>   | 0.0966    | 5.00E-06 |      |          |                          |              |                  |              |
| Education-Sharing      | Student's <i>t</i> | -1.8818   |          | 537  | 0.06     | -0.24                    | -0.49, 0.01  | -0.16            | -0.33, 0.01  |
|                        | BF <sub>10</sub>   | 0.5353    | 8.41E-07 |      |          |                          |              |                  |              |
| Education-C-Sharing    | Student's <i>t</i> | 1.4028    |          | 542  | 0.161    | 0.22                     | -0.09, 0.53  | 0.12             | -0.05, 0.29  |
|                        | BF <sub>10</sub>   | 0.2485    | 2.06E-06 |      |          |                          |              |                  |              |
| Fired-Sharing          | Student's <i>t</i> | -0.5651   |          | 540  | 0.572    | -0.07                    | -0.32, 0.18  | -0.05            | -0.22, 0.12  |
|                        | BF <sub>10</sub>   | 0.112     | 4.36E-06 |      |          |                          |              |                  |              |
| Fired-C-Sharing        | Student's <i>t</i> | -0.8106   |          | 539  | 0.418    | -0.13                    | -0.45, 0.19  | -0.07            | -0.24, 0.10  |
|                        | BF <sub>10</sub>   | 0.1319    | 3.70E-06 |      |          |                          |              |                  |              |
| Freud-Sharing          | Student's <i>t</i> | -0.5985   |          | 540  | 0.55     | -0.08                    | -0.33, 0.18  | -0.05            | -0.22, 0.12  |
|                        | BF <sub>10</sub>   | 0.1139    | 4.43E-06 |      |          |                          |              |                  |              |
| Freud-C-Sharing        | Student's <i>t</i> | 0.6405    |          | 539  | 0.522    | 0.09                     | -0.19, 0.38  | 0.06             | -0.11, 0.22  |
|                        | BF <sub>10</sub>   | 0.1169    | 4.30E-06 |      |          |                          |              |                  |              |
| Heartland-Sharing      | Student's <i>t</i> | -1.1391   |          | 540  | 0.255    | -0.15                    | -0.40, 0.11  | -0.10            | -0.27, 0.07  |
|                        | BF <sub>10</sub>   | 0.1798    | 2.78E-06 |      |          |                          |              |                  |              |
| Heartland-C-Sharing    | Student's <i>t</i> | -1.4622   |          | 539  | 0.144    | -0.19                    | -0.45, 0.07  | -0.13            | -0.29, 0.04  |
|                        | BF <sub>10</sub>   | 0.2706    | 1.79E-06 |      |          |                          |              |                  |              |
| Marriage-Sharing       | Student's <i>t</i> | -1.3292   |          | 543  | 0.184    | -0.18                    | -0.45, 0.09  | -0.11            | -0.28, 0.05  |
|                        | BF <sub>10</sub>   | 0.2252    | 2.31E-06 |      |          |                          |              |                  |              |
| Marriage-C-Sharing     | Student's <i>t</i> | -0.2148   |          | 536  | 0.83     | -0.03                    | -0.35, 0.28  | -0.02            | -0.19, 0.15  |
|                        | BF <sub>10</sub>   | 0.0981    | 4.95E-06 |      |          |                          |              |                  |              |
| Presidential-Sharing   | Student's <i>t</i> | -1.7379   |          | 535  | 0.083    | -0.23                    | -0.49, 0.03  | -0.15            | -0.32, 0.02  |
|                        | BF <sub>10</sub>   | 0.4166    | 1.05E-06 |      |          |                          |              |                  |              |
| Presidential-C-Sharing | Student's <i>t</i> | 0.0989    |          | 544  | 0.921    | 0.01                     | -0.26, 0.29  | 0.01             | -0.16, 0.18  |
|                        | BF <sub>10</sub>   | 0.0958    | 5.70E-06 |      |          |                          |              |                  |              |
| Twitterbio-Sharing     | Student's <i>t</i> | 0.6514    |          | 539  | 0.515    | 0.08                     | -0.17, 0.34  | 0.06             | -0.11, 0.22  |
|                        | BF <sub>10</sub>   | 0.1178    | 4.20E-06 |      |          |                          |              |                  |              |
| Twitterbio-C-Sharing   | Student's <i>t</i> | 0.3627    |          | 540  | 0.717    | 0.05                     | -0.24, 0.34  | 0.03             | -0.14, 0.20  |
|                        | BF <sub>10</sub>   | 0.1019    | 5.04E-06 |      |          |                          |              |                  |              |

<sup>a</sup> Levene's test is significant ( $p < .05$ ), suggesting a violation of the assumption of equal variances

**Table S23.**

Study 1 (emotional language): linear regression per outcome variable, with covariates. Significant predictors are marked in bold.

| Predictor              | <i>Technique recognition</i> |           |          |              | <i>Confidence</i> |           |          |          | <i>Trustworthiness</i> |           |          |              | <i>Sharing</i> |           |          |              |
|------------------------|------------------------------|-----------|----------|--------------|-------------------|-----------|----------|----------|------------------------|-----------|----------|--------------|----------------|-----------|----------|--------------|
|                        | <b>b</b>                     | <b>SE</b> | <b>t</b> | <b>p</b>     | <b>b</b>          | <b>SE</b> | <b>t</b> | <b>p</b> | <b>b</b>               | <b>SE</b> | <b>t</b> | <b>p</b>     | <b>b</b>       | <b>SE</b> | <b>t</b> | <b>p</b>     |
| Intercept <sup>a</sup> | 1.6762                       | 0.441     | 3.805    | <.001        | 0.45661           | 0.29      | 1.577    | 0.115    | 0.47679                | 0.369     | 1.2911   | 0.197        | 0.16702        | 0.353     | 0.473    | 0.636        |
| Condition:             |                              |           |          |              |                   |           |          |          |                        |           |          |              |                |           |          |              |
| Inoculation – Control  | 0.710                        | 0.083     | 8.594    | <.001        | 0.314             | 0.054     | 5.791    | <.001    | 0.289                  | 0.069     | 4.1789   | <.001        | 0.243          | 0.066     | 3.667    | <.001        |
| Gender                 | 0.313                        | 0.086     | 3.639    | <.001        | 0.016             | 0.057     | 0.279    | 0.78     | 0.156                  | 0.072     | 2.1661   | <b>0.031</b> | 0.053          | 0.069     | 0.775    | 0.439        |
| Age                    | -0.022                       | 0.032     | -0.7     | 0.485        | -0.005            | 0.021     | -0.27    | 0.791    | 0.008                  | 0.026     | 0.2994   | 0.765        | 0.017          | 0.025     | 0.686    | 0.493        |
| Education              | -0.087                       | 0.047     | -1.85    | 0.064        | 0.030             | 0.031     | 0.972    | 0.332    | -0.043                 | 0.04      | -1.085   | 0.278        | 0.004          | 0.038     | 0.109    | 0.913        |
| Political-Ideology     | -0.034                       | 0.025     | -1.37    | 0.171        | -0.006            | 0.016     | -0.4     | 0.692    | -0.056                 | 0.021     | -2.703   | <b>0.007</b> | -0.054         | 0.02      | -2.72    | <b>0.007</b> |
| News-Check             | 0.123                        | 0.05      | 2.458    | <b>0.014</b> | 0.013             | 0.033     | 0.399    | 0.69     | 0.115                  | 0.042     | 2.7359   | <b>0.006</b> | 0.088          | 0.04      | 2.198    | <b>0.028</b> |
| Social-Media-Use       | -0.031                       | 0.045     | -0.69    | 0.493        | 0.004             | 0.029     | 0.121    | 0.904    | -0.027                 | 0.037     | -0.725   | 0.469        | 0.018          | 0.036     | 0.511    | 0.61         |
| Populism               | -0.025                       | 0.076     | -0.34    | 0.738        | -0.052            | 0.05      | -1.04    | 0.298    | -0.006                 | 0.064     | -0.087   | 0.931        | -0.116         | 0.061     | -1.92    | 0.056        |
| Bullshit-Receptivity   | -0.261                       | 0.05      | -5.29    | <.001        | -0.110            | 0.033     | -3.38    | <.001    | -0.076                 | 0.042     | -1.842   | 0.066        | 0.036          | 0.04      | 0.898    | 0.369        |
| Conspiracy-Belief      | -0.255                       | 0.232     | -1.1     | 0.273        | 0.086             | 0.153     | 0.565    | 0.572    | -0.185                 | 0.195     | -0.951   | 0.342        | -0.125         | 0.186     | -0.67    | 0.502        |
| Analytical-Thinking    | 0.111                        | 0.039     | 2.864    | <b>0.004</b> | 0.046             | 0.025     | 1.809    | 0.071    | 0.101                  | 0.032     | 3.1221   | <b>0.002</b> | -0.012         | 0.031     | -0.39    | 0.70         |
| Numerical-Thinking     | 0.173                        | 0.045     | 3.87     | <.001        | -0.004            | 0.029     | -0.15    | 0.884    | 0.164                  | 0.038     | 4.3753   | <.001        | 0.101          | 0.036     | 2.803    | <b>0.005</b> |

<sup>a</sup> Represents reference level

**Table S24.**

Study 2 (incoherence): linear regression per outcome variable, with covariates. Significant predictors are marked in bold.

| Predictor              | <i>Technique recognition</i> |           |          |          | <i>Confidence</i> |           |          |          | <i>Trustworthiness</i> |           |          |              | <i>Sharing</i> |           |          |              |
|------------------------|------------------------------|-----------|----------|----------|-------------------|-----------|----------|----------|------------------------|-----------|----------|--------------|----------------|-----------|----------|--------------|
|                        | <b>b</b>                     | <b>SE</b> | <b>t</b> | <b>p</b> | <b>b</b>          | <b>SE</b> | <b>t</b> | <b>p</b> | <b>b</b>               | <b>SE</b> | <b>t</b> | <b>p</b>     | <b>b</b>       | <b>SE</b> | <b>t</b> | <b>p</b>     |
| Intercept <sup>a</sup> | 2.007                        | 0.485     | 4.143    | <.001    | 0.35028           | 0.278     | 1.2586   | 0.208    | 2.11531                | 0.391     | 5.4068   | <.001        | 1.02273        | 0.331     | 3.086    | 0.002        |
| Condition:             |                              |           |          |          |                   |           |          |          |                        |           |          |              |                |           |          |              |
| Control – Inoculation  | -0.881                       | 0.088     | -10.04   | <.001    | -0.190            | 0.051     | -3.757   | <.001    | -0.207                 | 0.071     | -2.922   | <b>0.004</b> | -0.086         | 0.06      | -1.44    | 0.151        |
| Gender                 | -0.074                       | 0.091     | -0.818   | 0.413    | -0.023            | 0.052     | -0.445   | 0.656    | -0.116                 | 0.073     | -1.583   | 0.114        | -0.130         | 0.062     | -2.1     | <b>0.036</b> |
| Age                    | -0.073                       | 0.035     | -2.063   | 0.039    | 0.002             | 0.02      | 0.0966   | 0.923    | -0.003                 | 0.029     | -0.101   | 0.92         | 0.004          | 0.024     | 0.181    | 0.856        |
| Education              | -0.063                       | 0.051     | -1.23    | 0.219    | -0.010            | 0.029     | -0.335   | 0.738    | -0.084                 | 0.041     | -2.036   | <b>0.042</b> | -0.114         | 0.035     | -3.27    | <b>0.001</b> |
| Political-Ideology     | -0.112                       | 0.027     | -4.121   | <.001    | -0.006            | 0.016     | -0.379   | 0.704    | -0.192                 | 0.022     | -8.755   | <.001        | -0.098         | 0.019     | -5.25    | <.001        |
| News-Check             | 0.055                        | 0.054     | 1.003    | 0.316    | 0.027             | 0.031     | 0.8666   | 0.386    | 0.062                  | 0.044     | 1.4197   | 0.156        | 0.062          | 0.037     | 1.668    | 0.096        |
| Social-Media-Use       | -0.016                       | 0.047     | -0.342   | 0.733    | -0.044            | 0.027     | -1.655   | 0.098    | -0.025                 | 0.038     | -0.663   | 0.508        | -0.035         | 0.032     | -1.11    | 0.267        |
| Populism               | 0.056                        | 0.081     | 0.687    | 0.492    | 0.010             | 0.047     | 0.2172   | 0.828    | 0.001                  | 0.066     | 0.0184   | 0.985        | -0.042         | 0.056     | -0.76    | 0.45         |
| Bullshit-Receptivity   | -0.198                       | 0.053     | -3.726   | <.001    | -0.020            | 0.031     | -0.666   | 0.506    | -0.106                 | 0.043     | -2.457   | <b>0.014</b> | 0.102          | 0.036     | 2.788    | <b>0.005</b> |
| Conspiracy-Belief      | -0.085                       | 0.237     | -0.356   | 0.722    | -0.044            | 0.136     | -0.321   | 0.749    | -0.384                 | 0.192     | -2.003   | <b>0.045</b> | -0.141         | 0.162     | -0.87    | 0.385        |
| Analytical-Thinking    | 0.067                        | 0.05      | 1.33     | 0.184    | -0.041            | 0.029     | -1.407   | 0.16     | 0.035                  | 0.041     | 0.8691   | 0.385        | -0.007         | 0.034     | -0.21    | 0.833        |
| Numerical-Thinking     | 0.224                        | 0.05      | 4.495    | <.001    | 0.016             | 0.029     | 0.5459   | 0.585    | 0.187                  | 0.04      | 4.6594   | <.001        | 0.117          | 0.034     | 3.436    | <.001        |

<sup>a</sup> Represents reference level

**Table S25.**

Study 3 (false dichotomies): linear regression per outcome variable, with covariates. Significant predictors are marked in bold.

| Predictor              | <i>Technique recognition</i> |           |          |          | <i>Confidence</i> |           |          |             | <i>Trustworthiness</i> |           |          |              | <i>Sharing</i> |           |          |              |
|------------------------|------------------------------|-----------|----------|----------|-------------------|-----------|----------|-------------|------------------------|-----------|----------|--------------|----------------|-----------|----------|--------------|
|                        | <b>b</b>                     | <b>SE</b> | <b>t</b> | <b>p</b> | <b>b</b>          | <b>SE</b> | <b>t</b> | <b>p</b>    | <b>b</b>               | <b>SE</b> | <b>t</b> | <b>p</b>     | <b>b</b>       | <b>SE</b> | <b>t</b> | <b>p</b>     |
| Intercept <sup>a</sup> | 3.15614                      | 0.487     | 6.4809   | < .001   | 0.27272           | 0.315     | 0.86459  | 0.387       | 1.75007                | 0.374     | 4.677    | < .001       | 0.6304         | 0.342     | 1.841    | 0.066        |
| Condition:             |                              |           |          |          |                   |           |          |             |                        |           |          |              |                |           |          |              |
| Control – Inoculation  | -1.164                       | 0.089     | -13.137  | < .001   | -0.236            | 0.057     | -4.1193  | < .001      | -0.397                 | 0.068     | -5.83    | < .001       | -0.242         | 0.062     | -3.89    | < .001       |
| Gender                 | 0.158                        | 0.093     | 1.7009   | 0.089    | 0.062             | 0.06      | 1.03602  | 0.3         | 0.056                  | 0.071     | 0.788    | 0.431        | 0.020          | 0.065     | 0.31     | 0.757        |
| Age                    | -0.065                       | 0.035     | -1.8411  | 0.066    | -0.053            | 0.023     | -2.3236  | <b>0.02</b> | 0.004                  | 0.027     | 0.14     | 0.889        | 0.032          | 0.025     | 1.279    | 0.201        |
| Education              | -0.067                       | 0.052     | -1.3037  | 0.193    | 0.044             | 0.034     | 1.30249  | 0.193       | -0.055                 | 0.04      | -1.39    | 0.166        | -0.082         | 0.036     | -2.26    | <b>0.024</b> |
| Political-Ideology     | -0.098                       | 0.027     | -3.6329  | < .001   | -9.47e-4          | 0.017     | -0.0544  | 0.957       | -0.081                 | 0.021     | -3.92    | < .001       | -0.054         | 0.019     | -2.86    | <b>0.004</b> |
| News-Check             | 0.039                        | 0.053     | 0.7281   | 0.467    | 0.005             | 0.035     | 0.14324  | 0.886       | 0.031                  | 0.041     | 0.763    | 0.445        | 0.016          | 0.038     | 0.428    | 0.668        |
| Social-Media-Use       | 0.052                        | 0.047     | 1.1044   | 0.27     | -0.020            | 0.03      | -0.6498  | 0.516       | 0.062                  | 0.036     | 1.712    | 0.087        | 0.045          | 0.033     | 1.378    | 0.168        |
| Populism               | -0.007                       | 0.083     | -0.0852  | 0.932    | 0.044             | 0.053     | 0.82315  | 0.411       | -0.094                 | 0.063     | -1.48    | 0.14         | 0.050          | 0.058     | 0.867    | 0.386        |
| Bullshit-Receptivity   | -0.385                       | 0.053     | -7.3352  | < .001   | 0.009             | 0.034     | 0.27225  | 0.785       | -0.123                 | 0.04      | -3.05    | <b>0.002</b> | 0.025          | 0.037     | 0.665    | 0.506        |
| Conspiracy-Belief      | -0.775                       | 0.234     | -3.3063  | < .001   | -0.242            | 0.152     | -1.5954  | 0.111       | -0.502                 | 0.18      | -2.79    | <b>0.005</b> | -0.423         | 0.165     | -2.57    | <b>0.01</b>  |
| Analytical-Thinking    | 0.133                        | 0.051     | 2.6186   | 0.009    | 0.000             | 0.033     | 0.0055   | 0.996       | 0.105                  | 0.039     | 2.691    | <b>0.007</b> | 0.029          | 0.036     | 0.823    | 0.411        |
| Numerical-Thinking     | 0.287                        | 0.051     | 5.6051   | < .001   | 0.018             | 0.033     | 0.53452  | 0.593       | 0.096                  | 0.039     | 2.446    | <b>0.015</b> | 0.027          | 0.036     | 0.761    | 0.447        |

<sup>a</sup> Represents reference level

**Table S26.**

Study 4 (scapegoating): linear regression per outcome variable, with covariates. Significant predictors are marked in bold.

| Predictor              | <i>Technique recognition</i> |           |          |             | <i>Confidence</i> |           |          |          | <i>Trustworthiness</i> |           |          |              | <i>Sharing</i> |           |          |          |
|------------------------|------------------------------|-----------|----------|-------------|-------------------|-----------|----------|----------|------------------------|-----------|----------|--------------|----------------|-----------|----------|----------|
|                        | <b>b</b>                     | <b>SE</b> | <b>t</b> | <b>p</b>    | <b>b</b>          | <b>SE</b> | <b>t</b> | <b>p</b> | <b>b</b>               | <b>SE</b> | <b>t</b> | <b>p</b>     | <b>b</b>       | <b>SE</b> | <b>t</b> | <b>p</b> |
| Intercept <sup>a</sup> | 3.2073                       | 0.515     | 6.231    | <.001       | 0.66618           | 0.347     | 1.921    | 0.055    | 1.65941                | 0.399     | 4.1637   | <.001        | 0.87836        | 0.344     | 2.552    | 0.01     |
| Condition:             |                              |           |          |             |                   |           |          |          |                        |           |          |              |                |           |          |          |
| Control – Inoculation  | -0.420                       | 0.1       | -4.22    | <.001       | -0.231            | 0.067     | -3.44    | <.001    | -0.091                 | 0.077     | -1.183   | 0.237        | -0.119         | 0.067     | -1.79    | 0.08     |
| Gender                 | 0.369                        | 0.105     | 3.516    | <.001       | -0.043            | 0.071     | -0.6     | 0.546    | 0.240                  | 0.081     | 2.9528   | <b>0.003</b> | 0.056          | 0.07      | 0.796    | 0.43     |
| Age                    | 0.079                        | 0.041     | 1.949    | 0.052       | -0.010            | 0.027     | -0.35    | 0.726    | 0.054                  | 0.032     | 1.7279   | 0.084        | 0.030          | 0.027     | 1.102    | 0.27     |
| Education              | -0.299                       | 0.057     | -5.27    | <.001       | 0.045             | 0.038     | 1.181    | 0.238    | -0.163                 | 0.044     | -3.714   | <.001        | -0.061         | 0.038     | -1.61    | 0.11     |
| Political-Ideology     | -0.045                       | 0.03      | -1.53    | 0.126       | 0.009             | 0.02      | 0.445    | 0.656    | -0.022                 | 0.023     | -0.96    | 0.337        | -0.018         | 0.02      | -0.92    | 0.36     |
| News-Check             | -0.020                       | 0.066     | -0.3     | 0.766       | -0.064            | 0.045     | -1.43    | 0.153    | 0.072                  | 0.051     | 1.408    | 0.159        | -0.009         | 0.044     | -0.2     | 0.84     |
| Social-Media-Use       | 0.088                        | 0.05      | 1.761    | 0.079       | -0.010            | 0.034     | -0.3     | 0.763    | 0.002                  | 0.039     | 0.0619   | 0.951        | 0.027          | 0.033     | 0.823    | 0.41     |
| Populism               | 0.238                        | 0.092     | 2.575    | <b>0.01</b> | -0.032            | 0.062     | -0.52    | 0.607    | 0.009                  | 0.072     | 0.1232   | 0.902        | -0.094         | 0.062     | -1.53    | 0.13     |
| Bullshit-Receptivity   | -0.312                       | 0.058     | -5.34    | <.001       | 0.022             | 0.039     | 0.552    | 0.581    | -0.111                 | 0.045     | -2.453   | <b>0.014</b> | 0.033          | 0.039     | 0.836    | 0.40     |
| Conspiracy-Belief      | -1.224                       | 0.274     | -4.47    | <.001       | -0.104            | 0.184     | -0.56    | 0.573    | -0.821                 | 0.212     | -3.878   | <.001        | -0.130         | 0.183     | -0.71    | 0.48     |
| Analytical-Thinking    | 0.047                        | 0.056     | 0.824    | 0.41        | -0.033            | 0.038     | -0.88    | 0.379    | 0.035                  | 0.044     | 0.8015   | 0.423        | 0.040          | 0.038     | 1.065    | 0.29     |
| Numerical-Thinking     | 0.270                        | 0.057     | 4.749    | <.001       | 0.016             | 0.038     | 0.406    | 0.685    | 0.156                  | 0.044     | 3.542    | <.001        | 0.058          | 0.038     | 1.516    | 0.13     |

<sup>a</sup> Represents reference level

**Table S27.**

Study 5 (ad hominem): linear regression per outcome variable, with covariates. Significant predictors are marked in bold.

| Predictor              | <i>Technique recognition</i> |           |          |              | <i>Confidence</i> |           |          |             | <i>Trustworthiness</i> |           |          |              | <i>Sharing</i> |           |          |              |
|------------------------|------------------------------|-----------|----------|--------------|-------------------|-----------|----------|-------------|------------------------|-----------|----------|--------------|----------------|-----------|----------|--------------|
|                        | <b>b</b>                     | <b>SE</b> | <b>t</b> | <b>p</b>     | <b>b</b>          | <b>SE</b> | <b>t</b> | <b>p</b>    | <b>b</b>               | <b>SE</b> | <b>t</b> | <b>p</b>     | <b>b</b>       | <b>SE</b> | <b>t</b> | <b>p</b>     |
| Intercept <sup>a</sup> | 3.3013                       | 0.517     | 6.384    | <.001        | 0.7233            | 0.346     | 2.09     | 0.04        | 0.7872                 | 0.373     | 2.109    | 0.035        | 0.00621        | 0.335     | 0.0185   | 0.99         |
| Condition:             |                              |           |          |              |                   |           |          |             |                        |           |          |              |                |           |          |              |
| Control – Inoculation  | -0.724                       | 0.096     | -7.51    | <.001        | 0.163             | 0.065     | 2.521    | <b>0.01</b> | -0.184                 | 0.07      | -2.65    | <b>0.008</b> | -0.170         | 0.062     | -2.724   | <b>0.01</b>  |
| Gender                 | 0.257                        | 0.1       | 2.576    | <b>0.01</b>  | 0.062             | 0.067     | 0.925    | 0.36        | 0.194                  | 0.072     | 2.702    | <b>0.007</b> | 0.062          | 0.065     | 0.9672   | 0.33         |
| Age                    | -0.094                       | 0.042     | -2.25    | <b>0.024</b> | -0.048            | 0.028     | -1.73    | 0.09        | 0.043                  | 0.03      | 1.429    | 0.153        | 0.050          | 0.027     | 1.8496   | 0.07         |
| Education              | -0.094                       | 0.055     | -1.69    | 0.091        | -0.038            | 0.037     | -1.02    | 0.31        | 0.010                  | 0.04      | 0.245    | 0.807        | -0.026         | 0.036     | -0.726   | 0.47         |
| Political-Ideology     | -0.101                       | 0.03      | -3.42    | <.001        | -0.031            | 0.02      | -1.55    | 0.12        | -0.071                 | 0.021     | -3.34    | <.001        | -0.034         | 0.019     | -1.782   | 0.08         |
| News-Check             | 0.120                        | 0.056     | 2.134    | <b>0.033</b> | 0.031             | 0.038     | 0.83     | 0.41        | 0.061                  | 0.041     | 1.495    | 0.135        | 0.083          | 0.036     | 2.287    | <b>0.02</b>  |
| Social-Media-Use       | 0.091                        | 0.051     | 1.782    | 0.075        | -0.022            | 0.034     | -0.64    | 0.52        | 0.079                  | 0.037     | 2.141    | <b>0.033</b> | 0.103          | 0.033     | 3.1179   | <b>0.002</b> |
| Populism               | 0.020                        | 0.092     | 0.219    | 0.827        | -0.098            | 0.061     | -1.59    | 0.11        | 0.050                  | 0.066     | 0.759    | 0.448        | 0.020          | 0.059     | 0.3322   | 0.74         |
| Bullshit-Receptivity   | -0.464                       | 0.057     | -8.13    | <.001        | -0.019            | 0.038     | -0.49    | 0.63        | -0.155                 | 0.041     | -3.77    | <.001        | 0.042          | 0.037     | 1.142    | 0.25         |
| Conspiracy-Belief      | -0.630                       | 0.272     | -2.32    | <b>0.021</b> | 0.116             | 0.182     | 0.64     | 0.52        | -0.433                 | 0.196     | -2.21    | <b>0.027</b> | -0.396         | 0.176     | -2.251   | <b>0.03</b>  |
| Analytical-Thinking    | 0.084                        | 0.055     | 1.527    | 0.127        | -0.015            | 0.037     | -0.41    | 0.68        | 0.015                  | 0.04      | 0.375    | 0.708        | -0.063         | 0.036     | -1.77    | 0.08         |
| Numerical-Thinking     | 0.243                        | 0.054     | 4.53     | <.001        | 0.051             | 0.036     | 1.412    | 0.16        | 0.114                  | 0.039     | 2.929    | <b>0.003</b> | 0.066          | 0.035     | 1.9001   | 0.06         |

<sup>a</sup> Represents reference level



**Table S28.**

Study 1 (emotional language): linear regression at the rating level for technique recognition, trustworthiness discernment and sharing discernment, with robust standard errors clustered on study participants and stimuli (manipulative vs neutral). Outcome variable of interest is “discernmentxinoculation”.

| Variables               | Technique recognition | Trustworthiness discernment | Sharing discernment  |
|-------------------------|-----------------------|-----------------------------|----------------------|
| discernment             | -1.336***<br>(0.206)  | 0.786***<br>(0.178)         | 0.322**<br>(0.130)   |
| inoculation             | 0.649***<br>(0.150)   | -0.00954<br>(0.0942)        | 0.0432<br>(0.102)    |
| discernmentxinoculation | -0.635***<br>(0.170)  | 0.280***<br>(0.0973)        | 0.162*<br>(0.0946)   |
| Constant                | 4.868***<br>(0.140)   | 3.331***<br>(0.127)         | 2.546***<br>(0.0960) |
| Observations            | 11,018                | 11,018                      | 11,018               |
| R-squared               | 0.187                 | 0.078                       | 0.012                |

Robust standard errors in parentheses

\*\*\* p<0.01, \*\* p<0.05, \* p<0.1

**Table S29.**

Study 2 (incoherence): linear regression at the rating level for technique recognition, trustworthiness discernment and sharing discernment, with robust standard errors clustered on study participants and stimuli (manipulative vs neutral). Outcome variable of interest is “discernmentxinoculation”.

| Variables               | Technique recognition | Trustworthiness discernment | Sharing discernment  |
|-------------------------|-----------------------|-----------------------------|----------------------|
| discernment             | -0.796***<br>(0.208)  | 1.114***<br>(0.263)         | 0.553***<br>(0.149)  |
| inoculation             | 1.426***<br>(0.125)   | -0.329**<br>(0.132)         | -0.0930<br>(0.0774)  |
| discernmentxinoculation | -0.834***<br>(0.172)  | 0.215<br>(0.156)            | 0.135*<br>(0.0817)   |
| Constant                | 3.664***<br>(0.152)   | 2.867***<br>(0.171)         | 2.025***<br>(0.0794) |
| Observations            | 11,141                | 11,141                      | 11,141               |
| R-squared               | 0.140                 | 0.113                       | 0.031                |

Robust standard errors in parentheses

\*\*\* p<0.01, \*\* p<0.05, \* p<0.1

**Table S30.**

Study 3 (false dichotomies): linear regression at the rating level for technique recognition, trustworthiness discernment and sharing discernment, with robust standard errors clustered on study participants and stimuli (manipulative vs neutral). Outcome variable of interest is “discernmentxinoculation”.

| <b>Variables</b>        | <b>Technique recognition</b> | <b>Trustworthiness discernment</b> | <b>Sharing discernment</b> |
|-------------------------|------------------------------|------------------------------------|----------------------------|
| discernment             | -1.170***<br>(0.145)         | 0.716***<br>(0.169)                | 0.375**<br>(0.179)         |
| inoculation             | 0.980***<br>(0.0961)         | -0.246***<br>(0.0847)              | -0.0980<br>(0.0852)        |
| discernmentxinoculation | -0.984***<br>(0.137)         | 0.361***<br>(0.0967)               | 0.177**<br>(0.0722)        |
| Constant                | 4.293***<br>(0.100)          | 3.560***<br>(0.119)                | 2.414***<br>(0.0948)       |
| Observations            | 11,239                       | 11,239                             | 11,239                     |
| R-squared               | 0.190                        | 0.072                              | 0.016                      |

Robust standard errors in parentheses

\*\*\* p<0.01, \*\* p<0.05, \* p<0.1

**Table S31.**

Study 4 (scapegoating): linear regression for technique recognition, trustworthiness discernment and sharing discernment, with robust standard errors clustered on study participants and stimuli (manipulative vs neutral). Outcome variable of interest is “discernmentxinoculation”.

| <b>Variables</b>        | <b>Technique recognition</b> | <b>Trustworthiness discernment</b> | <b>Sharing discernment</b> |
|-------------------------|------------------------------|------------------------------------|----------------------------|
| discernment             | -2.241***<br>(0.192)         | 1.150***<br>(0.118)                | 0.540***<br>(0.0823)       |
| inoculation             | 0.476***<br>(0.0932)         | -0.133<br>(0.0879)                 | -0.0210<br>(0.0871)        |
| discernmentxinoculation | -0.479***<br>(0.130)         | 0.132<br>(0.0889)                  | 0.131*<br>(0.0762)         |
| Constant                | 5.195***<br>(0.109)          | 2.989***<br>(0.0926)               | 2.168***<br>(0.0759)       |
| Observations            | 11,030                       | 11,030                             | 11,030                     |
| R-squared               | 0.348                        | 0.123                              | 0.028                      |

Robust standard errors in parentheses

\*\*\* p<0.01, \*\* p<0.05, \* p<0.1

**Table S32.**

Study 5 (ad hominem): linear regression for technique recognition, trustworthiness discernment and sharing discernment, with robust standard errors clustered on study participants and stimuli (manipulative vs neutral). Outcome variable of interest is “discernmentxinoculation”.

| Variables               | Technique recognition | Trustworthiness discernment | Sharing discernment  |
|-------------------------|-----------------------|-----------------------------|----------------------|
| discernment             | -1.695***<br>(0.213)  | 1.016***<br>(0.151)         | 0.580***<br>(0.117)  |
| inoculation             | 0.251**<br>(0.103)    | -0.146**<br>(0.0718)        | -0.131*<br>(0.0763)  |
| discernmentxinoculation | -0.765***<br>(0.140)  | 0.240***<br>(0.0751)        | 0.175***<br>(0.0673) |
| Constant                | 5.237***<br>(0.0745)  | 2.836***<br>(0.0841)        | 2.070***<br>(0.0701) |
| Observations            | 11,133                | 11,133                      | 11,133               |
| R-squared               | 0.257                 | 0.114                       | 0.038                |

Robust standard errors in parentheses

\*\*\* p<0.01, \*\* p<0.05, \* p<0.1

**Table S33.**

Studies 1-5: ANOVA table for technique recognition, with “study” as the between-groups variable, control participants only.

| ANOVA         | Sum of Sq. | df   | Mean Sq. | F    | p      | $\eta^2$ |
|---------------|------------|------|----------|------|--------|----------|
| Overall model | 817        | 4    | 204.17   | 84.8 | < .001 |          |
| Study         | 817        | 4    | 204.17   | 84.8 | < .001 | 0.109    |
| Residuals     | 6710       | 2787 | 2.41     |      |        |          |

| Study              |   | Study              | M <sub>diff</sub> | SE   | df   | t      | p <sub>tukey</sub> | Cohen's d | 95%CI        |
|--------------------|---|--------------------|-------------------|------|------|--------|--------------------|-----------|--------------|
| Ad hominem         | - | Emotional language | 0.38              | 0.09 | 2787 | 4.1    | <.001              | 0.25      | 0.13, 0.36   |
|                    | - | False dichotomies  | 0.59              | 0.09 | 2787 | 6.41   | <.001              | 0.38      | 0.26, 0.50   |
|                    | - | Incoherence        | 1.04              | 0.09 | 2787 | 11.24  | <.001              | 0.67      | 0.55, 0.79   |
|                    | - | Scapegoating       | -0.55             | 0.09 | 2787 | -5.96  | <.001              | -0.36     | -0.47, -0.24 |
| Emotional language | - | False dichotomies  | 0.21              | 0.09 | 2787 | 2.27   | 0.154              | 0.14      | 0.02, 0.25   |
|                    | - | Incoherence        | 0.66              | 0.09 | 2787 | 7.09   | <.001              | 0.43      | 0.31, 0.54   |
|                    | - | Scapegoating       | -0.94             | 0.09 | 2787 | -10.02 | <.001              | -0.60     | -0.72, -0.48 |
| False dichotomies  | - | Incoherence        | 0.45              | 0.09 | 2787 | 4.85   | <.001              | 0.29      | 0.17, 0.41   |
|                    | - | Scapegoating       | -1.15             | 0.09 | 2787 | -12.37 | <.001              | -0.74     | -0.86, -0.62 |
| Incoherence        | - | Scapegoating       | -1.60             | 0.09 | 2787 | -17.19 | <.001              | -1.03     | -1.15, -0.91 |

Note. Comparisons are based on estimated marginal means

**Table S34.**

Studies 1-5: ANOVA table for trustworthiness discernment, with “study” as the between-groups variable, control participants only.

| ANOVA         | Sum of Sq. | df   | Mean Sq | F    | <i>p</i> | $\eta^2$ |
|---------------|------------|------|---------|------|----------|----------|
| Overall model | 73.3       | 4    | 18.33   | 13.8 | < .001   |          |
| Study         | 73.3       | 4    | 18.33   | 13.8 | < .001   | 0.019    |
| Residuals     | 3711.6     | 2787 | 1.33    |      |          |          |

| Study              |   | Study              | $M_{diff}$ | SE    | df   | <i>t</i> | <i>p</i> <sub>Tukey</sub> | Cohen's <i>d</i> | 95%CI        |
|--------------------|---|--------------------|------------|-------|------|----------|---------------------------|------------------|--------------|
| Ad hominem         | - | Emotional language | 0.171      | 0.069 | 2787 | 2.46     | 0.099                     | 0.15             | 0.03, 0.27   |
|                    | - | False dichotomies  | 0.294      | 0.069 | 2787 | 4.28     | < .001                    | 0.26             | 0.14, 0.37   |
|                    | - | Incoherence        | -0.074     | 0.069 | 2787 | -1.08    | 0.818                     | -0.06            | -0.18, 0.05  |
|                    | - | Scapegoating       | -0.147     | 0.069 | 2787 | -2.12    | 0.210                     | -0.13            | -0.24, -0.01 |
| Emotional language | - | False dichotomies  | 0.124      | 0.069 | 2787 | 1.79     | 0.381                     | 0.11             | -0.01, 0.22  |
|                    | - | Incoherence        | -0.245     | 0.069 | 2787 | -3.54    | 0.004                     | -0.21            | -0.33, -0.09 |
|                    | - | Scapegoating       | -0.318     | 0.070 | 2787 | -4.57    | < .001                    | -0.28            | -0.39, -0.16 |
| False dichotomies  | - | Incoherence        | -0.369     | 0.069 | 2787 | -5.36    | < .001                    | -0.32            | -0.44, -0.20 |
|                    | - | Scapegoating       | -0.441     | 0.069 | 2787 | -6.4     | < .001                    | -0.38            | -0.50, -0.26 |
| Incoherence        | - | Scapegoating       | -0.073     | 0.069 | 2787 | -1.05    | 0.831                     | -0.06            | -0.18, 0.05  |

*Note.* Comparisons are based on estimated marginal means

**Table S35.**

Studies 1-5: Student's and Bayesian *t*-tests for technique recognition, confidence (manipulative and neutral posts), trustworthiness discernment, and sharing discernment, by study, with “never sharers” excluded.

| Study                       | Variable                  | Type               | Statistic | ±%       | df     | <i>p</i> | <i>M</i> <sub>diff</sub> | 95%CI       | Cohen's <i>d</i> | 95%CI       |
|-----------------------------|---------------------------|--------------------|-----------|----------|--------|----------|--------------------------|-------------|------------------|-------------|
| <i>1 Emotional language</i> | Technique rec.            | Student's <i>t</i> | 7.04      |          | 931    | < .001   | 0.66                     | 0.48, 0.84  | 0.46             | 0.33, 0.59  |
|                             |                           | BF <sub>10</sub>   | 1.60e0+9  | 5.82E-16 |        |          |                          |             |                  |             |
|                             | Confidence (manipulative) | Student's <i>t</i> | 7.74      |          | 932    | < .001   | 0.55                     | 0.41, 0.69  | 0.51             | 0.37, 0.64  |
|                             |                           | BF <sub>10</sub>   | 1.98E+11  | 3.55E-18 |        |          |                          |             |                  |             |
|                             | Confidence (neutral)      | Student's <i>t</i> | 3.65      |          | 932    | < .001   | 0.26                     | 0.12, 0.39  | 0.24             | 0.11, 0.37  |
|                             |                           | BF <sub>10</sub>   | 49.8      | 5.58e0-8 |        |          |                          |             |                  |             |
| Trustworthiness disc.       | Student's <i>t</i>        | 3.67               |           | 931      | < .001 | 0.29     | 0.13, 0.44               | 0.24        | 0.11, 0.37       |             |
|                             | BF <sub>10</sub>          | 52.7               | 5.11e0-8  |          |        |          |                          |             |                  |             |
| Sharing disc.               | Student's <i>t</i>        | 3.53               |           | 931      | < .001 | 0.26     | 0.12, 0.41               | 0.23        | 0.10, 0.36       |             |
|                             | BF <sub>10</sub>          | 32.2               | 8.62e0-8  |          |        |          |                          |             |                  |             |
| <i>2 Incoherence</i>        | Technique rec.            | Student's <i>t</i> | 8.56      |          | 872    | < .001   | 0.87                     | 0.67, 1.07  | 0.58             | 0.44, 0.72  |
|                             |                           | BF <sub>10</sub>   | 9.17E+13  | 1.13E-20 |        |          |                          |             |                  |             |
|                             | Confidence (manipulative) | Student's <i>t</i> | 1.27      |          | 874    | 0.204    | 0.09                     | -0.05, 0.24 | 0.09             | -0.05, 0.22 |
|                             |                           | BF <sub>10</sub>   | 0.167     | 2.05e0-6 |        |          |                          |             |                  |             |
|                             | Confidence (neutral)      | Student's <i>t</i> | -1.42     |          | 872    | 0.157    | -0.10                    | -0.24, 0.04 | -0.10            | -0.23, 0.04 |
|                             |                           | BF <sub>10</sub>   | 0.203     | 1.39e0-6 |        |          |                          |             |                  |             |
| Trustworthiness disc.       | Student's <i>t</i>        | 2.9                |           | 872      | 0.004  | 0.25     | 0.08, 0.41               | 0.20        | 0.06, 0.33       |             |
|                             | BF <sub>10</sub>          | 4.653              | 3.09e0-8  |          |        |          |                          |             |                  |             |
| Sharing disc.               | Student's <i>t</i>        | 2.332              |           | 872      | 0.02   | 0.17     | 0.03, 0.31               | 0.16        | 0.02, 0.29       |             |
|                             | BF <sub>10</sub>          | 1.089              | 1.78e0-7  |          |        |          |                          |             |                  |             |
| <i>3 False dichotomies</i>  | Technique disc.           | Student's <i>t</i> | 9.86      |          | 906    | < .001   | 1.05                     | 0.84, 1.25  | 0.66             | 0.52, 0.79  |
|                             |                           | BF <sub>10</sub>   | 4.75E+18  | 1.07E-25 |        |          |                          |             |                  |             |
|                             | Confidence (manipulative) | Student's <i>t</i> | 7.09      |          | 907    | < .001   | 0.51                     | 0.37, 0.65  | 0.47             | 0.34, 0.60  |
|                             |                           | BF <sub>10</sub>   | 2.21e0+9  | 7.27E-17 |        |          |                          |             |                  |             |
|                             | Confidence (neutral)      | Student's <i>t</i> | 3.81      |          | 906    | < .001   | 0.29                     | 0.14, 0.44  | 0.25             | 0.12, 0.38  |
|                             |                           | BF <sub>10</sub>   | 90.7      | 1.11e0-8 |        |          |                          |             |                  |             |
| Trustworthiness disc.       | Student's <i>t</i>        | 5.31               |           | 906      | < .001 | 0.41     | 0.26, 0.57               | 0.35        | 0.22, 0.48       |             |
|                             | BF <sub>10</sub>          | 63990.9            | 8.11E-12  |          |        |          |                          |             |                  |             |
| Sharing disc.               | Student's <i>t</i>        | 3.95               |           | 906      | < .001 | 0.29     | 0.15, 0.43               | 0.26        | 0.13, 0.39       |             |
|                             | BF <sub>10</sub>          | 152.8              | 6.27e0-9  |          |        |          |                          |             |                  |             |
| <i>4 Scapegoating</i>       | Technique rec.            | Student's <i>t</i> | 3.98      |          | 850    | < .001   | 0.47                     | 0.24, 0.70  | 0.27             | 0.14, 0.41  |
|                             |                           | BF <sub>10</sub>   | 172.734   | 3.29e0-9 |        |          |                          |             |                  |             |
|                             | Confidence (manipulative) | Student's <i>t</i> | 5.09      |          | 849    | < .001   | 0.38                     | 0.23, 0.53  | 0.35             | 0.21, 0.49  |
|                             |                           | BF <sub>10</sub>   | 21804.322 | 3.73E-11 |        |          |                          |             |                  |             |
|                             | Confidence (neutral)      | Student's <i>t</i> | 1.56      |          | 850    | 0.118    | 0.12                     | -0.03, 0.28 | 0.11             | -0.03, 0.24 |
|                             |                           | BF <sub>10</sub>   | 0.254     | 7.98e0-5 |        |          |                          |             |                  |             |
| Trustworthiness disc.       | Student's <i>t</i>        | 1.92               |           | 850      | 0.055  | 0.17     | 0.00, 0.35               | 0.13        | 0.00, 0.27       |             |
|                             | BF <sub>10</sub>          | 0.471              | 3.57e0-5  |          |        |          |                          |             |                  |             |
| Sharing disc.               | Student's <i>t</i>        | 1.84               |           | 850      | 0.067  | 0.15     | -0.01, 0.30              | 0.13        | -0.01, 0.26      |             |
|                             | BF <sub>10</sub>          | 0.4                | 1.22e0-5  |          |        |          |                          |             |                  |             |
| <i>5 Ad hominem</i>         | Technique rec.            | Student's <i>t</i> | 6.05      |          | 882    | < .001   | 0.70                     | 0.47, 0.93  | 0.41             | 0.27, 0.54  |
|                             |                           | BF <sub>10</sub>   | 3.64E+06  | 1.21E-11 |        |          |                          |             |                  |             |
|                             | Confidence (manipulative) | Student's <i>t</i> | 4.36      |          | 882    | < .001   | 0.34                     | 0.19, 0.50  | 0.29             | 0.16, 0.43  |
|                             |                           | BF <sub>10</sub>   | 783.52    | 1.86E-10 |        |          |                          |             |                  |             |
|                             | Confidence (neutral)      | Student's <i>t</i> | 5.74      |          | 882    | < .001   | 0.45                     | 0.30, 0.60  | 0.39             | 0.25, 0.52  |
|                             |                           | BF <sub>10</sub>   | 632560.93 | 3.45E-13 |        |          |                          |             |                  |             |
| Trustworthiness disc.       | Student's <i>t</i>        | 3.51               |           | 882      | < .001 | 0.28     | 0.12, 0.44               | 0.24        | 0.10, 0.37       |             |
|                             | BF <sub>10</sub>          | 31.15              | 8.26e0-9  |          |        |          |                          |             |                  |             |
| Sharing disc.               | Student's <i>t</i>        | 3.08               |           | 882      | 0.002  | 0.22     | 0.08, 0.36               | 0.21        | 0.07, 0.34       |             |
|                             | BF <sub>10</sub>          | 7.91               | 4.16e0-8  |          |        |          |                          |             |                  |             |

<sup>a</sup> Levene's test is significant (*p* < .05), suggesting a violation of the assumption of equal variances

**Table S36.**

Studies 1-5: Linear regressions with “Fake-Confidence” (confidence in technique recognition for the manipulative/misinformation stimuli) as dependent variable and perceived use of a manipulation technique in manipulative stimuli (Fake-Manipulativeness, Fake-Incoherence, Fake-Dichotomy, Fake-Scapegoating and Fake-AdHominem) and condition (inoculation – control) as independent variables. Note that in all 5 studies, the perceived use of a technique in manipulative social media content is significantly and positively correlated with participants’ confidence in recognizing these techniques, when controlling for the condition that participants were assigned to.

| Model fit measures - Fake-Confidence |       |                | Overall Model Test |     |      |       |
|--------------------------------------|-------|----------------|--------------------|-----|------|-------|
| Study                                | R     | R <sup>2</sup> | F                  | df1 | df2  | p     |
| 1 Emotional language                 | 0.543 | 0.295          | 224                | 2   | 1068 | <.001 |
| 2 Incoherence                        | 0.241 | 0.0579         | 33.3               | 2   | 1083 | <.001 |
| 3 False dichotomies                  | 0.464 | 0.215          | 150                | 2   | 1091 | <.001 |
| 4 Scapegoating                       | 0.695 | 0.483          | 502                | 2   | 1075 | <.001 |
| 5 Ad hominem                         | 0.65  | 0.423          | 395                | 2   | 1078 | <.001 |

  

| Model coefficients - Fake-Confidence |                        |        |        |       |       |
|--------------------------------------|------------------------|--------|--------|-------|-------|
| Study                                | Predictor              | b      | SE     | t     | p     |
| 1 Emotional language                 | Intercept <sup>a</sup> | 3.097  | 0.1224 | 25.29 | <.001 |
|                                      | Condition:             |        |        |       |       |
|                                      | Inoculation – Control  | 0.228  | 0.0588 | 3.87  | <.001 |
|                                      | Fake-Manipulativeness  | 0.45   | 0.0237 | 18.94 | <.001 |
| 2 Incoherence                        | Intercept <sup>a</sup> | 4.888  | 0.0995 | 49.11 | <.001 |
|                                      | Condition:             |        |        |       |       |
|                                      | Inoculation – Control  | -0.238 | 0.0738 | -3.23 | 0.001 |
|                                      | Fake-Incoherence       | 0.199  | 0.0245 | 8.12  | <.001 |
| 3 False dichotomies                  | Intercept <sup>a</sup> | 3.526  | 0.1119 | 31.5  | <.001 |
|                                      | Condition:             |        |        |       |       |
|                                      | Inoculation – Control  | 0.159  | 0.065  | 2.44  | 0.015 |
|                                      | Fake-Dichotomy         | 0.36   | 0.0241 | 14.96 | <.001 |
| 4 Scapegoating                       | Intercept <sup>a</sup> | 1.9492 | 0.1163 | 16.76 | <.001 |
|                                      | Condition:             |        |        |       |       |
|                                      | Inoculation – Control  | 0.0847 | 0.0498 | 1.7   | 0.089 |
|                                      | Fake-Scapegoating      | 0.6525 | 0.0213 | 30.67 | <.001 |
| 5 Ad hominem                         | Intercept <sup>a</sup> | 1.615  | 0.1371 | 11.78 | <.001 |
|                                      | Condition:             |        |        |       |       |
|                                      | Inoculation – Control  | 0.151  | 0.0586 | 2.57  | 0.01  |
|                                      | Fake-AdHominem         | 0.685  | 0.0248 | 27.62 | <.001 |

<sup>a</sup> Represents reference level

**Table S37.**

Studies 1-5: Linear regressions with “Control-Confidence” (confidence in technique recognition for the non-manipulative/neutral stimuli) as dependent variable and perceived use of a manipulation technique in non-manipulative stimuli (Control-Manipulativeness, Control-Incoherence, Control-Dichotomy, Control-Scapegoating and Control-AdHominem) and condition (inoculation – control) as independent variables. Note that in all 5 studies, the perceived use of a technique in non-manipulative social media content is significantly and negatively correlated with participants’ confidence in recognizing these techniques, when controlling for the condition that participants were assigned to.

| Study                | R     | R <sup>2</sup> | F    | df1 | df2  | p      |
|----------------------|-------|----------------|------|-----|------|--------|
| 1 Emotional language | 0.131 | 0.0171         | 9.26 | 2   | 1068 | < .001 |
| 2 Incoherence        | 0.14  | 0.0196         | 10.8 | 2   | 1081 | < .001 |
| 3 False dichotomies  | 0.224 | 0.0503         | 28.9 | 2   | 1090 | < .001 |
| 4 Scapegoating       | 0.256 | 0.0656         | 37.8 | 2   | 1076 | < .001 |
| 5 Ad hominem         | 0.242 | 0.0584         | 33.4 | 2   | 1078 | < .001 |

Model coefficients - Control-Confidence

| Study                | Predictor                | b       | SE     | t     | p      |
|----------------------|--------------------------|---------|--------|-------|--------|
| 1 Emotional language | Intercept <sup>a</sup>   | 5.3354  | 0.1076 | 49.6  | < .001 |
|                      | Condition:               |         |        |       |        |
|                      | Inoculation – Control    | 0.2199  | 0.0651 | 3.37  | < .001 |
|                      | Control-Manipulativeness | -0.0735 | 0.0277 | -2.65 | 0.008  |
| 2 Incoherence        | Intercept <sup>a</sup>   | 5.9273  | 0.089  | 66.56 | < .001 |
|                      | Condition:               |         |        |       |        |
|                      | Inoculation – Control    | -0.091  | 0.0661 | -1.38 | 0.169  |
|                      | Control-Incoherence      | -0.1077 | 0.0265 | -4.06 | < .001 |
| 3 False dichotomies  | Intercept <sup>a</sup>   | 5.599   | 0.1087 | 51.49 | < .001 |
|                      | Condition:               |         |        |       |        |
|                      | Inoculation – Control    | 0.264   | 0.0694 | 3.8   | < .001 |
|                      | Control-Dichotomy        | -0.198  | 0.0309 | -6.4  | < .001 |
| 4 Scapegoating       | Intercept <sup>a</sup>   | 5.868   | 0.0957 | 61.33 | < .001 |
|                      | Condition:               |         |        |       |        |
|                      | Inoculation – Control    | 0.125   | 0.068  | 1.84  | 0.066  |
|                      | Control-Scapegoating     | -0.242  | 0.0286 | -8.47 | < .001 |
| 5 Ad hominem         | Intercept <sup>a</sup>   | 5.477   | 0.1202 | 45.56 | < .001 |
|                      | Condition:               |         |        |       |        |
|                      | Inoculation – Control    | 0.352   | 0.0759 | 4.64  | < .001 |
|                      | Control-AdHominem        | -0.172  | 0.031  | -5.56 | < .001 |

<sup>a</sup> Represents reference level

**Table S38.**

Studies 1-5: ANOVAs for technique recognition (Diff-Technique) with the converted political ideology variable (left – moderate – right) and condition (inoculation – control) as independent variables. Significant interactions between political ideology and condition are marked in bold. See also Figure S2 and Table S39 for the Tukey post-hoc tests.

| Study                | ANOVA - Diff-Technique                   | Sum of Squares | df   | Mean Square | F       | <i>p</i>     | $\eta^2p$ |
|----------------------|------------------------------------------|----------------|------|-------------|---------|--------------|-----------|
| 1 Emotional language | Condition                                | 86.3           | 1    | 86.32       | 44.16   | <.001        | 0.04      |
|                      | Political-Ideology-converted             | 64.6           | 2    | 32.29       | 16.52   | <.001        | 0.03      |
|                      | Condition * Political-Ideology-converted | 12             | 2    | 6           | 3.07    | <b>0.047</b> | 0.006     |
|                      | Residuals                                | 2079.8         | 1064 | 1.95        |         |              |           |
| 2 Incoherence        | Condition                                | 187.02         | 1    | 187.02      | 86.82   | <.001        | 0.075     |
|                      | Political-Ideology-converted             | 80.06          | 2    | 40.03       | 18.58   | <.001        | 0.033     |
|                      | Condition * Political-Ideology-converted | 6.37           | 2    | 3.18        | 1.48    | 0.229        | 0.003     |
|                      | Residuals                                | 2322.14        | 1078 | 2.15        |         |              |           |
| 3 False dichotomies  | Condition                                | 312.37         | 1    | 312.373     | 123.836 | <.001        | 0.102     |
|                      | Political-Ideology-converted             | 100.28         | 2    | 50.139      | 19.877  | <.001        | 0.035     |
|                      | Condition * Political-Ideology-converted | 1.92           | 2    | 0.96        | 0.381   | 0.683        | 0.001     |
|                      | Residuals                                | 2741.92        | 1087 | 2.522       |         |              |           |
| 4 Scapegoating       | Condition                                | 50.06          | 1    | 50.06       | 16.963  | <.001        | 0.016     |
|                      | Political-Ideology-converted             | 28.39          | 2    | 14.19       | 4.81    | 0.008        | 0.009     |
|                      | Condition * Political-Ideology-converted | 2.87           | 2    | 1.44        | 0.487   | 0.615        | 0.001     |
|                      | Residuals                                | 3166.34        | 1073 | 2.95        |         |              |           |
| 5 Ad hominem         | Condition                                | 154            | 1    | 154.03      | 55.59   | <.001        | 0.049     |
|                      | Political-Ideology-converted             | 126.5          | 2    | 63.25       | 22.83   | <.001        | 0.041     |
|                      | Condition * Political-Ideology-converted | 10.7           | 2    | 5.34        | 1.93    | 0.146        | 0.004     |
|                      | Residuals                                | 2978.7         | 1075 | 2.77        |         |              |           |



**Table S39.**

Tukey post-hoc tests for technique recognition (Diff-Technique) with the converted political ideology variable (left – moderate – right) and condition (inoculation – control) as independent variables. Relevant *p*-values for differences between inoculation and control conditions for the same political ideology are marked in bold. Note that the only non-significant difference between inoculation and control condition is for moderates for the “emotional language” study, and for moderates and right-wingers for the “scapegoating” study. See also Figure S2 and Table S38.

Post Hoc Comparisons - Condition \* Political-Ideology-converted

| Study                | Condition     | Pol.Ideol-converted | Condition     | Pol.Ideol-converted | <i>M</i> <sub>diff</sub> | SE       | df           | t      | <i>p</i> <sub>tukey</sub> | Cohen's <i>d</i> |        |       |
|----------------------|---------------|---------------------|---------------|---------------------|--------------------------|----------|--------------|--------|---------------------------|------------------|--------|-------|
| 1 Emotional language | Control       | Left                | - Control     | Moderate            | 0.2989                   | 0.154    | 1064         | 1.935  | 0.381                     | 0.2138           |        |       |
|                      |               |                     | - Control     | Right               | 0.3548                   | 0.145    | 1064         | 2.449  | 0.141                     | 0.2538           |        |       |
|                      |               |                     | - Inoculation | Left                | -0.838                   | 0.118    | 1064         | -7.114 | <.001                     | -0.5994          |        |       |
|                      |               | - Inoculation       | Moderate      | 0.0169              | 0.163                    | 1064     | 0.104        | 1      | 0.0121                    |                  |        |       |
|                      |               | - Inoculation       | Right         | -0.3759             | 0.139                    | 1064     | -2.71        | 0.074  | -0.2689                   |                  |        |       |
|                      |               | Moderate            | - Control     | Right               | 0.0559                   | 0.177    | 1064         | 0.315  | 1                         | 0.0399           |        |       |
|                      |               |                     | - Inoculation | Left                | -1.1369                  | 0.156    | 1064         | -7.293 | <.001                     | 0.8132           |        |       |
|                      |               |                     | - Inoculation | Moderate            | -0.282                   | 0.192    | 1064         | -1.468 | <b>0.685</b>              | -0.2017          |        |       |
|                      |               | Right               | - Inoculation | Right               | -0.6748                  | 0.172    | 1064         | -3.917 | 0.001                     | -0.4827          |        |       |
|                      | - Inoculation |                     | Left          | -1.1928             | 0.146                    | 1064     | -8.149       | <.001  | 0.8532                    |                  |        |       |
|                      | - Inoculation |                     | Moderate      | -0.3379             | 0.184                    | 1064     | -1.832       | 0.445  | 0.2417                    |                  |        |       |
|                      | Inoculation   | Left                | - Inoculation | Right               | -0.7307                  | 0.164    | 1064         | -4.464 | <.001                     | -0.5226          |        |       |
|                      |               |                     | - Inoculation | Moderate            | 0.8549                   | 0.164    | 1064         | 5.212  | <.001                     | 0.6115           |        |       |
|                      |               |                     | - Inoculation | Right               | 0.4621                   | 0.14     | 1064         | 3.293  | 0.013                     | 0.3305           |        |       |
|                      | Moderate      | - Inoculation       | Right         | -0.3928             | 0.18                     | 1064     | -2.187       | 0.245  | -0.281                    |                  |        |       |
|                      |               | 2 Incoherence       | Control       | Left                | - Control                | Moderate | 0.611        | 0.16   | 1078                      | 3.83             | 0.002  | 0.416 |
|                      |               |                     |               |                     | - Control                | Right    | 0.381        | 0.151  | 1078                      | 2.52             | 0.12   | 0.26  |
|                      | - Inoculation |                     |               |                     | Left                     | -0.962   | 0.122        | 1078   | -7.87                     | <.001            | -0.656 |       |
| - Inoculation        | Moderate      |                     | -0.461        | 0.161               | 1078                     | -2.86    | 0.05         | -0.314 |                           |                  |        |       |
| - Inoculation        | Right         |                     | -0.274        | 0.155               | 1078                     | -1.77    | 0.487        | -0.186 |                           |                  |        |       |
| Moderate             | - Control     |                     | Right         | -0.23               | 0.183                    | 1078     | -1.26        | 0.807  | -0.157                    |                  |        |       |
|                      | - Inoculation |                     | Left          | -1.573              | 0.159                    | 1078     | -9.87        | <.001  | 1.072                     |                  |        |       |
|                      | - Inoculation |                     | Moderate      | -1.072              | 0.191                    | 1078     | -5.61        | <.001  | -0.731                    |                  |        |       |
| - Inoculation        | Right         |                     | -0.884        | 0.185               | 1078                     | -4.77    | <.001        | -0.603 |                           |                  |        |       |
| Right                | - Inoculation | Left                | -1.343        | 0.151               | 1078                     | -8.89    | <.001        | 0.915  |                           |                  |        |       |
|                      | - Inoculation | Moderate            | -0.842        | 0.184               | 1078                     | -4.57    | <.001        | 0.574  |                           |                  |        |       |
|                      | - Inoculation | Right               | -0.654        | 0.178               | 1078                     | -3.67    | <b>0.003</b> | -0.446 |                           |                  |        |       |
| Inoculation          | Left          | - Inoculation       | Moderate      | 0.501               | 0.161                    | 1078     | 3.11         | 0.024  | 0.341                     |                  |        |       |
|                      |               | - Inoculation       | Right         | 0.689               | 0.155                    | 1078     | 4.46         | <.001  | 0.469                     |                  |        |       |
|                      |               | - Inoculation       | Right         | 0.188               | 0.187                    | 1078     | 1            | 0.917  | 0.128                     |                  |        |       |
| 3 False dichotomies  | Control       | Left                | - Control     | Moderate            | 0.377                    | 0.182    | 1087         | 2.07   | 0.306                     | 0.237            |        |       |
|                      |               |                     | - Control     | Right               | 0.818                    | 0.161    | 1087         | 5.07   | <.001                     | 0.515            |        |       |
|                      |               |                     | - Inoculation | Left                | -1.068                   | 0.133    | 1087         | -8.06  | <.001                     | -0.673           |        |       |
|                      |               | - Inoculation       | Moderate      | -0.767              | 0.167                    | 1087     | -4.59        | <.001  | -0.483                    |                  |        |       |
|                      |               | - Inoculation       | Right         | -0.451              | 0.159                    | 1087     | -2.84        | 0.052  | -0.284                    |                  |        |       |
|                      |               | Moderate            | - Control     | Right               | 0.441                    | 0.208    | 1087         | 2.12   | 0.277                     | 0.278            |        |       |
|                      |               |                     | - Inoculation | Left                | -1.445                   | 0.186    | 1087         | -7.75  | <.001                     | 0.91             |        |       |
|                      |               |                     | - Inoculation | Moderate            | -1.143                   | 0.212    | 1087         | -5.38  | <.001                     | -0.72            |        |       |
|                      |               | - Inoculation       | Right         | -0.828              | 0.206                    | 1087     | -4.02        | <.001  | -0.521                    |                  |        |       |
|                      | Right         | - Inoculation       | Left          | -1.886              | 0.166                    | 1087     | -11.36       | <.001  | 1.188                     |                  |        |       |
|                      |               | - Inoculation       | Moderate      | -1.584              | 0.195                    | 1087     | -8.14        | <.001  | 0.998                     |                  |        |       |
|                      |               | - Inoculation       | Right         | -1.269              | 0.188                    | 1087     | -6.76        | <.001  | -0.799                    |                  |        |       |
|                      | Inoculation   | Left                | - Inoculation | Moderate            | 0.302                    | 0.172    | 1087         | 1.76   | 0.493                     | 0.19             |        |       |

|                |         |             |             |             |          |             |          |         |         |                 |          |       |         |
|----------------|---------|-------------|-------------|-------------|----------|-------------|----------|---------|---------|-----------------|----------|-------|---------|
|                |         |             | -           | Inoculation | Right    | 0.617       | 0.163    | 1087    | 3.78    | 0.002           | 0.389    |       |         |
|                |         | Moderate    | -           | Inoculation | Right    | 0.316       | 0.192    | 1087    | 1.64    | 0.572           | 0.199    |       |         |
| 4 Scapegoating | Control | Left        | -           | Control     | Moderate | 0.26012     | 0.193    | 1073    | 1.3472  | 0.758           | 0.15143  |       |         |
|                |         |             | -           | Control     | Right    | 0.25669     | 0.175    | 1073    | 1.4683  | 0.685           | 0.14943  |       |         |
|                |         |             | -           | Inoculation | Left     | 0.52865     | 0.144    | 1073    | -3.6766 | <b>0.003</b>    | -0.30774 |       |         |
|                |         | -           | Inoculation | Moderate    | 0.30332  | 0.192       | 1073     | -1.5761 | 0.615   | -0.17657        |          |       |         |
|                |         | -           | Inoculation | Right       | 0.05046  | 0.175       | 1073     | -0.288  | 1       | -0.02937        |          |       |         |
|                |         | Moderate    | -           | Control     | Right    | 0.00343     | 0.218    | 1073    | -0.0158 | 1               | -0.002   |       |         |
|                |         |             | -           | Inoculation | Left     | 0.78877     | 0.194    | 1073    | -4.0712 | <.001           | 0.45917  |       |         |
|                | Right   | Moderate    | -           | Inoculation | Moderate | 0.56344     | 0.232    | 1073    | -2.4269 | <b>0.148</b>    | -0.328   |       |         |
|                |         |             | -           | Inoculation | Right    | 0.31058     | 0.218    | 1073    | -1.4241 | 0.712           | -0.1808  |       |         |
|                |         |             | -           | Inoculation | Left     | 0.78533     | 0.176    | 1073    | -4.4737 | <.001           | 0.45717  |       |         |
|                |         | Right       | -           | Inoculation | Moderate | 0.56001     | 0.217    | 1073    | -2.5783 | 0.103           | 0.326    |       |         |
|                |         |             | -           | Inoculation | Right    | 0.30715     | 0.202    | 1073    | -1.5198 | <b>0.652</b>    | -0.1788  |       |         |
|                |         |             | Inoculation | Left        | -        | Inoculation | Moderate | 0.22533 | 0.193   | 1073            | 1.1668   | 0.853 | 0.13117 |
|                |         |             |             |             | -        | Inoculation | Right    | 0.47819 | 0.176   | 1073            | 2.7178   | 0.073 | 0.27837 |
| Moderate       | -       | Inoculation | Right       | 0.25286     | 0.218    | 1073        | 1.1624   | 0.855   | 0.1472  |                 |          |       |         |
| 5 Ad hominem   | Control | Left        | -           | Control     | Moderate | 0.9971      | 0.185    | 1075    | 5.397   | <.001           | 0.599    |       |         |
|                |         |             | -           | Control     | Right    | 0.7418      | 0.172    | 1075    | 4.31    | <.001           | 0.4456   |       |         |
|                |         |             | -           | Inoculation | Left     | -0.5593     | 0.137    | 1075    | -4.089  | <b>&lt;.001</b> | -0.336   |       |         |
|                |         | -           | Inoculation | Moderate    | 0.0392   | 0.179       | 1075     | 0.219   | 1       | 0.0236          |          |       |         |
|                |         | -           | Inoculation | Right       | -0.2208  | 0.188       | 1075     | -1.172  | 0.85    | -0.1327         |          |       |         |
|                |         | Moderate    | -           | Control     | Right    | -0.2553     | 0.21     | 1075    | -1.216  | 0.829           | -0.1534  |       |         |
|                |         |             | -           | Inoculation | Left     | -1.5564     | 0.182    | 1075    | -8.544  | <.001           | 0.935    |       |         |
|                | Right   | Moderate    | -           | Inoculation | Moderate | -0.9579     | 0.216    | 1075    | -4.443  | <b>&lt;.001</b> | -0.5754  |       |         |
|                |         |             | -           | Inoculation | Right    | -1.2179     | 0.224    | 1075    | -5.449  | <.001           | -0.7317  |       |         |
|                |         |             | -           | Inoculation | Left     | -1.3011     | 0.169    | 1075    | -7.684  | <.001           | 0.7816   |       |         |
|                |         | Right       | -           | Inoculation | Moderate | -0.7026     | 0.205    | 1075    | -3.43   | 0.008           | 0.4221   |       |         |
|                |         |             | -           | Inoculation | Right    | -0.9626     | 0.213    | 1075    | -4.516  | <b>&lt;.001</b> | -0.5783  |       |         |
|                |         |             | Inoculation | Left        | -        | Inoculation | Moderate | 0.5985  | 0.176   | 1075            | 3.397    | 0.009 | 0.3596  |
|                |         |             |             |             | -        | Inoculation | Right    | 0.3385  | 0.186   | 1075            | 1.821    | 0.452 | 0.2033  |
| Moderate       | -       | Inoculation | Right       | -0.2601     | 0.219    | 1075        | -1.189   | 0.842   | -0.1562 |                 |          |       |         |

Note: Comparisons are based on estimated marginal means

**Table S40.**

Studies 1-5: ANOVAs for technique recognition (Diff-Technique) with the converted “bullshit receptivity” variable (high - low) and condition (inoculation – control) as independent variables. Significant interactions between “bullshit receptivity” and condition are marked in bold. See also Figure S3 and Table S41 for the Tukey post-hoc tests.

| Study                | ANOVA - Diff-Technique                     | Sum of Squares | df   | Mean Square | F        | p      | $\eta^2p$ |
|----------------------|--------------------------------------------|----------------|------|-------------|----------|--------|-----------|
| 1 Emotional language | Condition                                  | 127.58         | 1    | 127.58      | 66.866   | < .001 | 0.059     |
|                      | Bullshit-receptivity-converted             | 117.827        | 1    | 117.827     | 61.754   | < .001 | 0.055     |
|                      | Condition * Bullshit-receptivity-converted | 0.214          | 1    | 0.214       | 0.112    | 0.737  | 0.000     |
|                      | Residuals                                  | 2035.83        | 1067 | 1.908       |          |        |           |
| 2 Incoherence        | Condition                                  | 216.6          | 1    | 216.57      | 100.8    | < .001 | 0.085     |
|                      | Bullshit-receptivity-converted             | 59.3           | 1    | 59.26       | 27.6     | < .001 | 0.025     |
|                      | Condition * Bullshit-receptivity-converted | 28.4           | 1    | 28.36       | 13.2     | < .001 | 0.012     |
|                      | Residuals                                  | 2321.4         | 1080 | 2.15        |          |        |           |
| 3 False dichotomies  | Condition                                  | 368.61         | 1    | 368.61      | 153.371  | < .001 | 0.123     |
|                      | Bullshit-receptivity-converted             | 226.59         | 1    | 226.59      | 94.28    | < .001 | 0.08      |
|                      | Condition * Bullshit-receptivity-converted | 1.25           | 1    | 1.25        | 0.521    | 0.471  | 0.000     |
|                      | Residuals                                  | 2617.28        | 1089 | 2.4         |          |        |           |
| 4 Scapegoating       | Condition                                  | 52.1359        | 1    | 52.1359     | 18.5227  | < .001 | 0.017     |
|                      | Bullshit-receptivity-converted             | 171.6785       | 1    | 171.6785    | 60.9934  | < .001 | 0.054     |
|                      | Condition * Bullshit-receptivity-converted | 0.0358         | 1    | 0.0358      | 0.0127   | 0.91   | 0.000     |
|                      | Residuals                                  | 3025.809       | 1075 | 2.8147      |          |        |           |
| 5 Ad hominem         | Condition                                  | 154            | 1    | 154.03      | 55.59    | < .001 | 0.049     |
|                      | Political-Ideology-converted               | 126.5          | 2    | 63.25       | 22.83    | < .001 | 0.041     |
|                      | Condition * Political-Ideology-converted   | 10.7           | 2    | 5.34        | 1.93     | 0.146  | 0.004     |
|                      | Residuals                                  | 2978.7         | 1075 | 2.77        |          |        |           |
|                      | Condition                                  | 155.89339      | 1    | 155.89339   | 59.11762 | < .001 | 0.052     |
|                      | Bullshit-receptivity-converted             | 275.11676      | 1    | 275.11676   | 104.3293 | < .001 | 0.088     |
|                      | Condition * Bullshit-receptivity-converted | 0.00514        | 1    | 0.00514     | 0.00195  | 0.965  | 0.000     |
|                      | Residuals                                  | 2840.05313     | 1077 | 2.637       |          |        |           |

**Table S41.**

Studies 1-5: Tukey post-hoc tests for technique recognition (Diff-Technique) with the converted “bullshit receptivity” variable (high - low) and condition (inoculation – control) as independent variables. Relevant *p*-values for differences between inoculation and control conditions for the same levels of “bullshit receptivity” are marked in bold. Note that technique recognition is significantly higher for the inoculation condition in all studies for both high- and low levels of “bullshit receptivity”. See also Figure S3 and Table S40.

Post Hoc Comparisons - Condition \* Bullshit-receptivity-converted

| Study                | Condition   | BS-Recep-converted | Condition     | BS-Recep-converted | M <sub>diff</sub> | SE    | df   | t       | <i>p</i> <sub>Tukey</sub> | Cohen's <i>d</i> |
|----------------------|-------------|--------------------|---------------|--------------------|-------------------|-------|------|---------|---------------------------|------------------|
| 1 Emotional language | Control     | High               | - Control     | Low                | -0.6968           | 0.119 | 1067 | -5.834  | <.001                     | -0.5045          |
|                      |             |                    | - Inoculation | High               | -0.7239           | 0.113 | 1067 | -6.419  | <b>&lt;.001</b>           | -0.5241          |
|                      |             |                    | - Inoculation | Low                | -1.3637           | 0.121 | 1067 | -11.295 | <.001                     | -0.9873          |
|                      | Inoculation | High               | - Inoculation | High               | -0.0271           | 0.12  | 1067 | -0.226  | 0.996                     | 0.0196           |
|                      |             |                    | - Inoculation | Low                | -0.6669           | 0.127 | 1067 | -5.238  | <b>&lt;.001</b>           | -0.4828          |
|                      |             |                    | - Inoculation | Low                | -0.6398           | 0.121 | 1067 | -5.284  | <.001                     | -0.4632          |
| 2 Incoherence        | Control     | High               | - Control     | Low                | -0.144            | 0.126 | 1080 | -1.15   | 0.658                     | -0.0985          |
|                      |             |                    | - Inoculation | High               | -0.572            | 0.13  | 1080 | -4.4    | <b>&lt;.001</b>           | -0.3898          |
|                      |             |                    | - Inoculation | Low                | -1.364            | 0.126 | 1080 | -10.85  | <.001                     | -0.9304          |
|                      | Inoculation | High               | - Inoculation | High               | -0.427            | 0.127 | 1080 | -3.37   | 0.004                     | 0.2913           |
|                      |             |                    | - Inoculation | Low                | -1.22             | 0.122 | 1080 | -9.97   | <b>&lt;.001</b>           | -0.8319          |
|                      |             |                    | - Inoculation | Low                | -0.793            | 0.127 | 1080 | -6.25   | <.001                     | -0.5406          |
| 3 False dichotomies  | Control     | High               | - Control     | Low                | -0.845            | 0.132 | 1089 | -6.41   | <.001                     | -0.545           |
|                      |             |                    | - Inoculation | High               | -1.096            | 0.132 | 1089 | -8.28   | <b>&lt;.001</b>           | -0.707           |
|                      |             |                    | - Inoculation | Low                | -2.077            | 0.137 | 1089 | -15.12  | <.001                     | -1.34            |
|                      | Inoculation | High               | - Inoculation | High               | -0.251            | 0.128 | 1089 | -1.96   | 0.205                     | 0.162            |
|                      |             |                    | - Inoculation | Low                | -1.232            | 0.134 | 1089 | -9.23   | <b>&lt;.001</b>           | -0.795           |
|                      |             |                    | - Inoculation | Low                | -0.981            | 0.134 | 1089 | -7.32   | <.001                     | -0.633           |
| 4 Scapegoating       | Control     | High               | - Control     | Low                | -0.787            | 0.144 | 1075 | -5.46   | <.001                     | -0.469           |
|                      |             |                    | - Inoculation | High               | -0.429            | 0.144 | 1075 | -2.98   | <b>0.016</b>              | -0.255           |
|                      |             |                    | - Inoculation | Low                | -1.239            | 0.141 | 1075 | -8.76   | <.001                     | -0.738           |
|                      | Inoculation | High               | - Inoculation | High               | 0.359             | 0.148 | 1075 | 2.43    | 0.073                     | -0.214           |
|                      |             |                    | - Inoculation | Low                | -0.452            | 0.145 | 1075 | -3.11   | <b>0.01</b>               | -0.269           |
|                      |             |                    | - Inoculation | Low                | -0.81             | 0.145 | 1075 | -5.59   | <.001                     | -0.483           |
| 5 Ad hominem         | Control     | High               | - Control     | Low                | -1.012            | 0.141 | 1077 | -7.16   | <.001                     | -0.623           |
|                      |             |                    | - Inoculation | High               | -0.761            | 0.132 | 1077 | -5.76   | <b>&lt;.001</b>           | -0.468           |
|                      |             |                    | - Inoculation | Low                | -1.781            | 0.141 | 1077 | -12.64  | <.001                     | -1.097           |
|                      | Inoculation | High               | - Inoculation | High               | 0.251             | 0.141 | 1077 | 1.79    | 0.28                      | -0.155           |
|                      |             |                    | - Inoculation | Low                | -0.769            | 0.149 | 1077 | -5.17   | <b>&lt;.001</b>           | -0.474           |
|                      |             |                    | - Inoculation | Low                | -1.021            | 0.14  | 1077 | -7.28   | <.001                     | -0.629           |

Note. Comparisons are based on estimated marginal means

**Table S42.**

Studies 1-5: ANOVAs for technique recognition (Diff-Technique) with the converted analytical thinking variable (high - low) and condition (inoculation – control) as independent variables. See also Figure S4 and Table S42 for the Tukey post-hoc tests.

| Study                | ANOVA - Diff-Technique                  | Sum of Squares | df   | Mean Square | F       | p     | $\eta^2p$ |
|----------------------|-----------------------------------------|----------------|------|-------------|---------|-------|-----------|
| 1 Emotional language | Condition                               | 128.99         | 1    | 128.99      | 66.16   | <.001 | 0.058     |
|                      | Analytic-Thinking-converted             | 70.56          | 1    | 70.56       | 36.19   | <.001 | 0.033     |
|                      | Condition * Analytic-Thinking-converted | 3.45           | 1    | 3.45        | 1.77    | 0.183 | 0.002     |
|                      | Residuals                               | 2080.25        | 1067 | 1.95        |         |       |           |
| 2 Incoherence        | Condition                               | 230.3          | 1    | 230.3       | 105     | <.001 | 0.089     |
|                      | Analytic-Thinking-converted             | 35.53          | 1    | 35.53       | 16.2    | <.001 | 0.015     |
|                      | Condition * Analytic-Thinking-converted | 4.04           | 1    | 4.04        | 1.84    | 0.175 | 0.002     |
|                      | Residuals                               | 2368.77        | 1080 | 2.19        |         |       |           |
| 3 False dichotomies  | Condition                               | 302.58         | 1    | 302.58      | 119.975 | <.001 | 0.099     |
|                      | Analytic-Thinking-converted             | 95.68          | 1    | 95.68       | 37.938  | <.001 | 0.034     |
|                      | Condition * Analytic-Thinking-converted | 2.28           | 1    | 2.28        | 0.903   | 0.342 | 0.001     |
|                      | Residuals                               | 2746.47        | 1089 | 2.52        |         |       |           |
| 4 Scapegoating       | Condition                               | 61.193         | 1    | 61.193      | 20.865  | <.001 | 0.019     |
|                      | Analytic-Thinking-converted             | 44.137         | 1    | 44.137      | 15.049  | <.001 | 0.014     |
|                      | Condition * Analytic-Thinking-converted | 0.604          | 1    | 0.604       | 0.206   | 0.65  | 0.000     |
|                      | Residuals                               | 3152.824       | 1075 | 2.933       |         |       |           |
| 5 Ad hominem         | Condition                               | 149.11         | 1    | 149.11      | 52.55   | <.001 | 0.047     |
|                      | Analytic-Thinking-converted             | 55.31          | 1    | 55.31       | 19.49   | <.001 | 0.018     |
|                      | Condition * Analytic-Thinking-converted | 4.09           | 1    | 4.09        | 1.44    | 0.23  | 0.001     |
|                      | Residuals                               | 3055.85        | 1077 | 2.84        |         |       |           |

**Table S43.**

Studies 1-5: Tukey post-hoc tests for technique recognition (Diff-Technique) with the converted analytical thinking variable (high - low) and condition (inoculation – control) as independent variables. Relevant *p*-values for differences between inoculation and control conditions for the same levels of analytical thinking are marked in bold. Note that technique recognition is significantly higher for the inoculation condition in all studies for both high and low levels of analytical thinking. See also Figure S4 and Table S42.

Post Hoc Comparisons - Condition \* Analytic-Thinking-converted

| Study                | Condition   | Analyt.Think.-converted | Condition     | Analyt.Think.-converted | M <sub>diff</sub> | SE    | df     | t            | <i>p</i> <sub>Tukey</sub> | Cohen's <i>d</i> |
|----------------------|-------------|-------------------------|---------------|-------------------------|-------------------|-------|--------|--------------|---------------------------|------------------|
| 1 Emotional language | Control     | High                    | - Control     | Low                     | 0.403             | 0.121 | 1067   | 3.33         | 0.005                     | 0.289            |
|                      |             |                         | - Inoculation | High                    | -0.814            | 0.129 | 1067   | -6.31        | <.001                     | -0.583           |
|                      |             |                         | - Inoculation | Low                     | -0.182            | 0.123 | 1067   | -1.49        | 0.447                     | -0.131           |
|                      | Low         | - Inoculation           | High          | -1.217                  | 0.121             | 1067  | -10.09 | <.001        | 0.872                     |                  |
|                      |             | - Inoculation           | Low           | -0.585                  | 0.114             | 1067  | -5.14  | <.001        | -0.419                    |                  |
|                      |             | - Inoculation           | Low           | 0.632                   | 0.122             | 1067  | 5.18   | <.001        | 0.453                     |                  |
|                      | Inoculation | High                    | - Inoculation | Low                     |                   |       |        |              |                           |                  |
| 2 Incoherence        | Control     | High                    | - Control     | Low                     | 0.242             | 0.128 | 1080   | 1.89         | 0.232                     | 0.163            |
|                      |             |                         | - Inoculation | High                    | -1.051            | 0.135 | 1080   | -7.77        | <.001                     | -0.71            |
|                      |             |                         | - Inoculation | Low                     | -0.564            | 0.129 | 1080   | -4.38        | <.001                     | -0.381           |
|                      | Low         | - Inoculation           | High          | -1.293                  | 0.128             | 1080  | -10.14 | <.001        | 0.873                     |                  |
|                      |             | - Inoculation           | Low           | -0.805                  | 0.12              | 1080  | -6.69  | <.001        | -0.544                    |                  |
|                      |             | - Inoculation           | Low           | 0.488                   | 0.129             | 1080  | 3.79   | <.001        | 0.329                     |                  |
|                      | Inoculation | High                    | - Inoculation | Low                     |                   |       |        |              |                           |                  |
| 3 False dichotomies  | Control     | High                    | - Control     | Low                     | 0.686             | 0.136 | 1089   | 5.04         | <.001                     | 0.432            |
|                      |             |                         | - Inoculation | High                    | -0.965            | 0.141 | 1089   | -6.84        | <.001                     | -0.608           |
|                      |             |                         | - Inoculation | Low                     | -0.463            | 0.141 | 1089   | -3.28        | 0.006                     | -0.291           |
|                      | Low         | - Inoculation           | High          | -1.652                  | 0.132             | 1089  | -12.52 | <.001        | 1.04                      |                  |
|                      |             | - Inoculation           | Low           | -1.149                  | 0.132             | 1089  | -8.72  | <.001        | -0.723                    |                  |
|                      |             | - Inoculation           | Low           | 0.503                   | 0.137             | 1089  | 3.67   | 0.001        | 0.317                     |                  |
|                      | Inoculation | High                    | - Inoculation | Low                     |                   |       |        |              |                           |                  |
| 4 Scapegoating       | Control     | High                    | - Control     | Low                     | 0.3577            | 0.147 | 1075   | 2.43         | 0.072                     | 0.2089           |
|                      |             |                         | - Inoculation | High                    | 0.5244            | 0.152 | 1075   | -3.461       | <b>0.003</b>              | -0.3062          |
|                      |             |                         | - Inoculation | Low                     | 0.0719            | 0.148 | 1075   | -0.487       | 0.962                     | -0.042           |
|                      | Low         | - Inoculation           | High          | -0.882                  | 0.148             | 1075  | -5.974 | <.001        | 0.515                     |                  |
|                      |             | - Inoculation           | Low           | 0.4296                  | 0.144             | 1075  | -2.989 | <b>0.015</b> | -0.2508                   |                  |
|                      |             | - Inoculation           | Low           | 0.4525                  | 0.148             | 1075  | 3.054  | 0.012        | 0.2642                    |                  |
|                      | Inoculation | High                    | - Inoculation | Low                     |                   |       |        |              |                           |                  |
| 5 Ad hominem         | Control     | High                    | - Control     | Low                     | 0.582             | 0.147 | 1077   | 3.97         | <.001                     | 0.346            |
|                      |             |                         | - Inoculation | High                    | -0.627            | 0.157 | 1077   | -3.98        | <.001                     | -0.372           |
|                      |             |                         | - Inoculation | Low                     | -0.294            | 0.145 | 1077   | -2.03        | 0.179                     | -0.175           |
|                      | Low         | - Inoculation           | High          | -1.21                   | 0.148             | 1077  | -8.16  | <.001        | 0.718                     |                  |
|                      |             | - Inoculation           | Low           | -0.876                  | 0.135             | 1077  | -6.49  | <.001        | -0.52                     |                  |
|                      |             | - Inoculation           | Low           | 0.333                   | 0.147             | 1077  | 2.27   | 0.105        | 0.198                     |                  |
|                      | Inoculation | High                    | - Inoculation | Low                     |                   |       |        |              |                           |                  |

Note. Comparisons are based on estimated marginal means



|                              |               |               |               |               |                  |   |              |       |                         |
|------------------------------|---------------|---------------|---------------|---------------|------------------|---|--------------|-------|-------------------------|
| Numerical-Thinking           |               |               | 0.29          | 0.19 – 0.40   | <b>&lt;0.001</b> |   |              |       |                         |
| Numerical-Thinking*Condition |               |               | 0.03          | -0.13 – 0.19  | 0.713            |   |              |       |                         |
| Social-Media-Use             |               |               |               |               |                  | 0 | -0.11 – 0.12 | 0.944 |                         |
| Social-Media-Use*Condition   |               |               |               |               |                  | - | -0.33 – 0.01 | 0.061 |                         |
| News-Check                   |               |               |               |               |                  |   |              |       | 0.03 -0.11 – 0.16 0.704 |
| News-Check*Condition         |               |               |               |               |                  |   |              |       | 0.1 -0.09 – 0.29 0.32   |
| Observations                 | 1094          | 1094          | 1094          | 1095          |                  |   |              |       | 1096                    |
| R2*R2 adj.                   | 0.124 / 0.121 | 0.076 / 0.074 | 0.100 / 0.098 | 0.055 / 0.053 |                  |   |              |       | 0.052 / 0.049           |

---



**Table S45.**

Study 2 (incoherence): two-way interactions with technique discernment between condition and age, gender, education level, political ideology, populism, analytical thinking, bullshit receptivity, conspiracy belief, numerical thinking, social media use, and how often people check the news.

| Predictors                               | Age      |               |              | Gender   |               |              | Education |               |          | Political Ideology |               |          | Populism |               |              | Analytical Thinking |              |          |               |              |
|------------------------------------------|----------|---------------|--------------|----------|---------------|--------------|-----------|---------------|----------|--------------------|---------------|----------|----------|---------------|--------------|---------------------|--------------|----------|---------------|--------------|
|                                          | <i>b</i> | 95% CI        | <i>p</i>     | <i>b</i> | 95% CI        | <i>p</i>     | <i>b</i>  | 95% CI        | <i>p</i> | <i>b</i>           | 95% CI        | <i>p</i> | <i>b</i> | 95% CI        | <i>p</i>     | <i>b</i>            | 95% CI       | <i>p</i> |               |              |
| (Intercept)                              | 1.18     | 0.85 – 1.50   | <0.001       | 0.86     | 0.68 – 1.03   | <0.001       | 0.52      | -0.04 – 1.08  | 0.068    | 1.08               | 0.82 – 1.35   | <0.001   | 0.87     | 0.10 – 1.63   | <b>0.026</b> | 0.6                 | 0.41 – 0.79  | <0.001   |               |              |
| Condition                                | 0.46     | -0.00 – 0.92  | 0.052        | 0.77     | 0.52 – 1.02   | <0.001       | 1.46      | 0.67 – 2.25   | <0.001   | 1.11               | 0.74 – 1.49   | <0.001   | 1.29     | 0.22 – 2.36   | <b>0.018</b> | 0.69                | 0.42 – 0.96  | <0.001   |               |              |
| Age                                      | -0.13    | -0.22 – -0.05 | <b>0.003</b> |          |               |              |           |               |          |                    |               |          |          |               |              |                     |              |          |               |              |
| Age * Condition                          | 0.13     | 0.00 – 0.25   | <b>0.043</b> |          |               |              |           |               |          |                    |               |          |          |               |              |                     |              |          |               |              |
| Gender                                   |          |               |              | -        | -0.51 – -0.01 | <b>0.038</b> |           |               |          |                    |               |          |          |               |              |                     |              |          |               |              |
| Gender * Condition                       |          |               |              | 0.26     |               |              |           |               |          |                    |               |          |          |               |              |                     |              |          |               |              |
| Education                                |          |               |              | 0.22     | -0.13 – 0.57  | 0.223        |           |               |          | 0.05               | -0.09 – 0.19  | 0.476    |          |               |              |                     |              |          |               |              |
| Education * Condition                    |          |               |              |          |               |              |           |               |          | -                  | -0.34 – 0.05  | 0.15     |          |               |              |                     |              |          |               |              |
| Political-Ideology                       |          |               |              |          |               |              |           |               |          |                    |               |          | -        | -0.18 – -0.04 | <b>0.002</b> |                     |              |          |               |              |
| Political-Ideology * Condition           |          |               |              |          |               |              |           |               |          | 0.11               |               |          | -        | -0.17 – 0.03  | 0.181        |                     |              |          |               |              |
| Populism                                 |          |               |              |          |               |              |           |               |          |                    |               |          |          |               |              | -                   | -0.24 – 0.16 | 0.701    |               |              |
| Populism * Condition                     |          |               |              |          |               |              |           |               |          |                    |               |          | 0.04     |               |              | -                   | -0.40 – 0.18 | 0.455    |               |              |
| Analytical-Thinking                      |          |               |              |          |               |              |           |               |          |                    |               |          | 0.11     |               |              |                     |              | 0.1      | -0.02 – 0.23  | 0.113        |
| Analytical-Thinking * Condition          |          |               |              |          |               |              |           |               |          |                    |               |          |          |               |              |                     |              | 0.18     | 0.00 – 0.36   | <b>0.047</b> |
| Observations                             |          | 1108          |              |          | 1095          |              |           | 1108          |          |                    | 1107          |          |          | 1106          |              |                     |              |          | 1106          |              |
| R <sup>2</sup> / R <sup>2</sup> adjusted |          | 0.091 / 0.088 |              |          | 0.084 / 0.082 |              |           | 0.085 / 0.083 |          |                    | 0.109 / 0.107 |          |          | 0.085 / 0.082 |              |                     |              |          | 0.101 / 0.098 |              |

  

| Predictors                       | Bullshit Receptivity |               |          | Conspiracy Belief |               |             | Numeracy |              |          | Soc. Media. Use |             |              | News Checking |              |              |
|----------------------------------|----------------------|---------------|----------|-------------------|---------------|-------------|----------|--------------|----------|-----------------|-------------|--------------|---------------|--------------|--------------|
|                                  | <i>b</i>             | 95% CI        | <i>p</i> | <i>b</i>          | 95% CI        | <i>p</i>    | <i>b</i> | 95% CI       | <i>p</i> | <i>b</i>        | 95% CI      | <i>p</i>     | <i>b</i>      | 95% CI       | <i>p</i>     |
| (Intercept)                      | 0.86                 | 0.50 – 1.23   | <0.001   | 0.81              | 0.46 – 1.16   | <0.001      | 0.25     | -0.13 – 0.62 | 0.196    | 0.49            | 0.03 – 0.95 | <b>0.036</b> | 0.38          | -0.17 – 0.94 | 0.176        |
| Condition                        | 2.05                 | 1.54 – 2.56   | <0.001   | 1.5               | 1.01 – 1.99   | <0.001      | -0.1     | -0.63 – 0.43 | 0.719    | 1.6             | 0.93 – 2.27 | <0.001       | 1.12          | 0.33 – 1.90  | <b>0.005</b> |
| Bullshit-Receptivity             | -0.06                | -0.19 – 0.08  | 0.412    |                   |               |             |          |              |          |                 |             |              |               |              |              |
| Bullshit-Receptivity * Condition | -0.45                | -0.63 – -0.26 | <0.001   |                   |               |             |          |              |          |                 |             |              |               |              |              |
| Conspiracy-Belief                |                      |               |          | -                 | -0.71 – 0.40  | 0.579       |          |              |          |                 |             |              |               |              |              |
| Conspiracy-Belief * Condition    |                      |               |          | 0.16              |               |             |          |              |          |                 |             |              |               |              |              |
| Numerical-Thinking               |                      |               |          | -                 | -1.79 – -0.25 | <b>0.01</b> |          |              |          | 0.16            | 0.04 – 0.28 | <b>0.009</b> |               |              |              |
| Numerical-Thinking * Condition   |                      |               |          | 1.02              |               |             |          |              |          | 0.34            | 0.17 – 0.50 | <0.001       |               |              |              |
| Social-Media-Use                 |                      |               |          |                   |               |             |          |              |          |                 |             |              | 0.06          | -0.06 – 0.18 | 0.314        |

|                                          |               |               |               |      |               |              |      |                    |
|------------------------------------------|---------------|---------------|---------------|------|---------------|--------------|------|--------------------|
| Social-Media-Use * Condition             |               |               |               | -    | -0.35 - -0.01 | <b>0.034</b> |      |                    |
| News-Check                               |               |               |               | 0.18 |               |              | 0.09 | -0.05 - 0.23 0.228 |
| News-Check * Condition                   |               |               |               |      |               |              | -    | -0.26 - 0.14 0.574 |
| Observations                             | 1106          | 1106          | 1106          |      | 1107          |              | 0.06 | 1107               |
| R <sup>2</sup> / R <sup>2</sup> adjusted | 0.130 / 0.127 | 0.098 / 0.096 | 0.140 / 0.138 |      | 0.087 / 0.084 |              |      | 0.084 / 0.082      |

---

**Table S46.**

Study 3 (false dichotomies): two-way interactions with technique discernment between condition and age, gender, education level, political ideology, populism, analytical thinking, bullshit receptivity, conspiracy belief, numeracy, social media use, and how often people check the news.

| Predictors                               | Age      |               |          | Gender   |               |          | Education |               |          | Political Ideology |               |          | Populism |               |          | Analytical Thinking |               |          |
|------------------------------------------|----------|---------------|----------|----------|---------------|----------|-----------|---------------|----------|--------------------|---------------|----------|----------|---------------|----------|---------------------|---------------|----------|
|                                          | <i>b</i> | 95% CI        | <i>p</i> | <i>b</i> | 95% CI        | <i>p</i> | <i>b</i>  | 95% CI        | <i>p</i> | <i>b</i>           | 95% CI        | <i>p</i> | <i>b</i> | 95% CI        | <i>p</i> | <i>b</i>            | 95% CI        | <i>p</i> |
| (Intercept)                              | 1.45     | 1.10 – 1.81   | <0.001   | 1.17     | 0.97 – 1.36   | <0.001   | 1.09      | 0.50 – 1.69   | <0.001   | 1.91               | 1.63 – 2.20   | <0.001   | 2.38     | 1.53 – 3.23   | <0.001   | 0.73                | 0.53 – 0.94   | <0.001   |
| Condition                                | 0.78     | 0.27 – 1.29   | 0.003    | 0.83     | 0.56 – 1.10   | <0.001   | 1.28      | 0.41 – 2.15   | 0.004    | 0.86               | 0.45 – 1.26   | <0.001   | 1.5      | 0.33 – 2.68   | 0.012    | 1.07                | 0.78 – 1.37   | <0.001   |
| Age                                      | -        | -             | 0.077    |          |               |          |           |               |          |                    |               |          |          |               |          |                     |               |          |
| Age * Condition                          | 0.09     | 0.18 – 0.01   |          |          |               |          |           |               |          |                    |               |          |          |               |          |                     |               |          |
|                                          | 0.08     | -             | 0.273    |          |               |          |           |               |          |                    |               |          |          |               |          |                     |               |          |
|                                          |          | 0.06 – 0.21   |          |          |               |          |           |               |          |                    |               |          |          |               |          |                     |               |          |
| Gender                                   |          |               |          | -        | -0.34 – 0.20  | 0.616    |           |               |          |                    |               |          |          |               |          |                     |               |          |
|                                          |          |               |          | 0.07     |               |          |           |               |          |                    |               |          |          |               |          |                     |               |          |
| Gender * Condition                       |          |               |          | 0.47     | 0.09 – 0.85   | 0.015    |           |               |          |                    |               |          |          |               |          |                     |               |          |
| Education                                |          |               |          |          |               |          | 0.02      | -             | 0.838    |                    |               |          |          |               |          |                     |               |          |
|                                          |          |               |          |          |               |          |           | 0.13 – 0.16   |          |                    |               |          |          |               |          |                     |               |          |
| Education * Condition                    |          |               |          |          |               |          |           | -             | 0.585    |                    |               |          |          |               |          |                     |               |          |
|                                          |          |               |          |          |               |          | 0.06      | 0.28 – 0.16   |          |                    |               |          |          |               |          |                     |               |          |
| Political-Ideology                       |          |               |          |          |               |          |           |               |          | -                  | -0.31 – -     | <0.001   |          |               |          |                     |               |          |
|                                          |          |               |          |          |               |          |           |               |          | 0.23               | 0.15          |          |          |               |          |                     |               |          |
| Political-Ideology * Condition           |          |               |          |          |               |          |           |               |          | 0.07               | -0.04 – 0.17  | 0.209    |          |               |          |                     |               |          |
| Populism                                 |          |               |          |          |               |          |           |               |          |                    |               |          | -        | -0.56 – -0.10 | 0.004    |                     |               |          |
|                                          |          |               |          |          |               |          |           |               |          |                    |               |          | 0.33     |               |          |                     |               |          |
| Populism * Condition                     |          |               |          |          |               |          |           |               |          |                    |               |          | -        | -0.43 – 0.19  | 0.448    |                     |               |          |
|                                          |          |               |          |          |               |          |           |               |          |                    |               |          | 0.12     |               |          |                     |               |          |
| Analytical-Thinking                      |          |               |          |          |               |          |           |               |          |                    |               |          |          |               |          | 0.37                | 0.23 – 0.50   | <0.001   |
| Analytical-Thinking * Condition          |          |               |          |          |               |          |           |               |          |                    |               |          |          |               |          | -                   | -             | 0.616    |
| Condition                                |          |               |          |          |               |          |           |               |          |                    |               |          |          |               |          | 0.05                | 0.24 – 0.14   |          |
| Observations                             |          | 1117          |          |          | 1109          |          |           | 1117          |          |                    | 1113          |          |          | 1112          |          |                     | 1112          |          |
| R <sup>2</sup> / R <sup>2</sup> adjusted |          | 0.096 / 0.093 |          |          | 0.104 / 0.102 |          |           | 0.093 / 0.091 |          |                    | 0.137 / 0.134 |          |          | 0.114 / 0.112 |          |                     | 0.132 / 0.130 |          |

  

| Predictors                       | Bullshit Receptivity |             |          | Conspiracy Belief |              |          | Numeracy |             |          | Soc. Media. Use |              |          | News Checking |             |          |
|----------------------------------|----------------------|-------------|----------|-------------------|--------------|----------|----------|-------------|----------|-----------------|--------------|----------|---------------|-------------|----------|
|                                  | <i>b</i>             | 95% CI      | <i>p</i> | <i>b</i>          | 95% CI       | <i>p</i> | <i>b</i> | 95% CI      | <i>p</i> | <i>b</i>        | 95% CI       | <i>p</i> | <i>b</i>      | 95% CI      | <i>p</i> |
| (Intercept)                      | 2.5                  | 2.13 – 2.88 | <0.001   | 2.26              | 1.90 – 2.61  | <0.001   | -        | -           | 0.433    | 1.28            | 0.76 – 1.80  | <0.001   | 0.97          | 0.39 – 1.56 | 0.001    |
| Condition                        | 1.45                 | 0.91 – 1.98 | <0.001   | 1.05              | 0.54 – 1.55  | <0.001   | 0.17     | 0.61 – 0.26 |          | 0.7             | 0.12 – 1.28  | 0.018    | 1.06          | 0.33 – 1.79 | 0.004    |
| Bullshit-Receptivity             | -                    | -0.65 – -   | <0.001   |                   |              |          |          |             |          |                 |              |          |               |             |          |
|                                  | 0.51                 | 0.38        |          |                   |              |          |          |             |          |                 |              |          |               |             |          |
| Bullshit-Receptivity * Condition | -                    | -           | 0.197    |                   |              |          |          |             |          |                 |              |          |               |             |          |
|                                  | 0.12                 | 0.31 – 0.06 |          |                   |              |          |          |             |          |                 |              |          |               |             |          |
| Conspiracy-Belief                |                      |             |          | -1.9              | -2.47 – -    | <0.001   |          |             |          |                 |              |          |               |             |          |
|                                  |                      |             |          |                   | 1.33         |          |          |             |          |                 |              |          |               |             |          |
| Conspiracy-Belief * Condition    |                      |             |          | 0.08              | -0.72 – 0.88 | 0.853    |          |             |          |                 |              |          |               |             |          |
| Numerical-Thinking               |                      |             |          |                   |              |          | 0.44     | 0.30 – 0.58 | <0.001   |                 |              |          |               |             |          |
| Numerical-Thinking * Condition   |                      |             |          |                   |              |          | 0.12     | -           | 0.19     |                 |              |          |               |             |          |
|                                  |                      |             |          |                   |              |          |          | 0.06 – 0.30 |          |                 |              |          |               |             |          |
| Social-Media-Use                 |                      |             |          |                   |              |          |          |             |          | -               | -0.17 – 0.10 | 0.632    |               |             |          |
|                                  |                      |             |          |                   |              |          |          |             |          | 0.03            |              |          |               |             |          |

|                                          |               |               |               |               |              |       |      |                    |
|------------------------------------------|---------------|---------------|---------------|---------------|--------------|-------|------|--------------------|
| Social-Media-Use * Condition             |               |               |               | 0             | -0.19 - 0.18 | 0.975 |      |                    |
| News-Check                               |               |               |               |               |              |       | 0.05 | -0.10 - 0.20 0.533 |
| News-Check * Condition                   |               |               |               |               |              |       | 0.09 | -0.13 - 0.30 0.431 |
| Observations                             | 1112          | 1112          | 1112          | 1113          |              |       |      | 1113               |
| R <sup>2</sup> / R <sup>2</sup> adjusted | 0.199 / 0.197 | 0.157 / 0.155 | 0.185 / 0.183 | 0.095 / 0.093 |              |       |      | 0.097 / 0.095      |

---

**Table S47.**

Study 4 (scapegoating): two-way interactions with technique discernment between condition and age, gender, education level, political ideology, populism, analytical thinking, bullshit receptivity, conspiracy belief, numerical thinking, social media use, and how often people check the news.

| Predictors                               | Age      |               |              | Gender   |               |              | Education |               |              | Political Ideology |               |              | Populism |               |             | Analytical Thinking |               |             |
|------------------------------------------|----------|---------------|--------------|----------|---------------|--------------|-----------|---------------|--------------|--------------------|---------------|--------------|----------|---------------|-------------|---------------------|---------------|-------------|
|                                          | <i>b</i> | 95% <i>CI</i> | <i>p</i>     | <i>b</i> | 95% <i>CI</i> | <i>p</i>     | <i>b</i>  | 95% <i>CI</i> | <i>p</i>     | <i>b</i>           | 95% <i>CI</i> | <i>p</i>     | <i>b</i> | 95% <i>CI</i> | <i>p</i>    | <i>b</i>            | 95% <i>CI</i> | <i>p</i>    |
| (Intercept)                              | 1.95     | 1.59 – 2.31   | <0.001       | 2.15     | 1.95 – 2.36   | <0.001       | 3.33      | 2.68 – 3.98   | <0.001       | 2.57               | 2.27 – 2.87   | <0.001       | 2.43     | 1.56 – 3.30   | <0.001      | 2.11                | 1.88 – 2.33   | <0.001      |
| Condition                                | 0.59     | 0.06 – 1.11   | <b>0.028</b> | 0.38     | 0.08 – 0.67   | <b>0.013</b> | 0.33      | -0.57 – 1.23  | 0.473        | 0.61               | 0.18 – 1.05   | <b>0.006</b> | 0.54     | -             | 0.417       | 0.42                | 0.10 – 0.75   | <b>0.01</b> |
| Age                                      | 0.11     | 0.01 – 0.22   | <b>0.034</b> |          |               |              |           |               |              |                    |               |              |          | 0.76 – 1.83   |             |                     |               |             |
| Age * Condition                          | -        | -0.20 – 0.10  | 0.494        |          |               |              |           |               |              |                    |               |              |          |               |             |                     |               |             |
| Gender                                   |          |               |              | 0.29     | -0.00 – 0.58  | 0.052        |           |               |              |                    |               |              |          |               |             |                     |               |             |
| Gender * Condition                       |          |               |              | 0.09     | -0.33 – 0.50  | 0.68         |           |               |              |                    |               |              |          |               |             |                     |               |             |
| Education                                |          |               |              |          |               |              | -         | -0.42 – -0.10 | <b>0.002</b> |                    |               |              |          |               |             |                     |               |             |
| Education * Condition                    |          |               |              |          |               |              | 0.26      | -             |              |                    |               |              |          |               |             |                     |               |             |
| Political-Ideology                       |          |               |              |          |               |              | 0.03      | -0.20 – 0.25  | 0.812        |                    |               |              |          |               |             |                     |               |             |
| Political-Ideology * Condition           |          |               |              |          |               |              |           |               |              |                    | -             | -0.16 – 0.00 | 0.059    |               |             |                     |               |             |
| Populism                                 |          |               |              |          |               |              |           |               |              |                    | 0.08          | -            |          |               |             |                     |               |             |
| Populism * Condition                     |          |               |              |          |               |              |           |               |              |                    | 0.06          | -0.17 – 0.06 | 0.335    |               |             |                     |               |             |
| Analytical-Thinking                      |          |               |              |          |               |              |           |               |              |                    |               |              |          | -             | -           |                     | 0.786         |             |
| Analytical-Thinking * Condition          |          |               |              |          |               |              |           |               |              |                    |               |              |          | 0.03          | 0.26 – 0.20 |                     | 0.867         |             |
| Observations                             |          | 1097          |              |          | 1082          |              |           | 1097          |              |                    | 1095          |              |          | 1093          |             |                     | 1093          |             |
| R <sup>2</sup> / R <sup>2</sup> adjusted |          | 0.020 / 0.017 |              |          | 0.024 / 0.021 |              |           | 0.032 / 0.029 |              |                    | 0.027 / 0.024 |              |          | 0.015 / 0.012 |             |                     | 0.025 / 0.022 |             |

  

|                                  | Bullshit Receptivity |               |          | Conspiracy Belief |               |          | Numeracy |               |          | Soc. Media. Use |               |          | News Checking |               |          |
|----------------------------------|----------------------|---------------|----------|-------------------|---------------|----------|----------|---------------|----------|-----------------|---------------|----------|---------------|---------------|----------|
|                                  | <i>b</i>             | 95% <i>CI</i> | <i>p</i> | <i>b</i>          | 95% <i>CI</i> | <i>p</i> | <i>b</i> | 95% <i>CI</i> | <i>p</i> | <i>b</i>        | 95% <i>CI</i> | <i>p</i> | <i>b</i>      | 95% <i>CI</i> | <i>p</i> |
| (Intercept)                      | 3.56                 | 3.13 – 4.00   | <0.001   | 3.37              | 2.94 – 3.81   | <0.001   | 1.46     | 1.01 – 1.90   | <0.001   | 2.24            | 1.71 – 2.76   | <0.001   | 2.02          | 1.36 – 2.67   | <0.001   |
| Condition                        | 0.48                 | -0.13 – 1.09  | 0.12     | 0.19              | -0.41 – 0.79  | 0.535    | 0.32     | -0.32 – 0.96  | 0.331    | 0.68            | -0.10 – 1.45  | 0.086    | 0.84          | -             | 0.094    |
| Bullshit-Receptivity             | -                    | -0.61 – -     | <0.001   |                   |               |          |          |               |          |                 |               |          |               | 0.14 – 1.82   |          |
| Bullshit-Receptivity * Condition | 0.46                 | 0.31          |          |                   |               |          |          |               |          |                 |               |          |               |               |          |
| Conspiracy-Belief                | -                    | -0.24 – 0.18  | 0.773    |                   |               |          |          |               |          |                 |               |          |               |               |          |
| Conspiracy-Belief * Condition    | 0.03                 |               |          | -                 | -2.42 – -     | <0.001   |          |               |          |                 |               |          |               |               |          |
| Numerical-Thinking               |                      |               |          | 1.75              | 1.08          |          |          |               |          | 0.29            | 0.15 – 0.44   | <0.001   |               |               |          |
| Numerical-Thinking * Condition   |                      |               |          | 0.37              | -0.57 – 1.31  | 0.437    |          |               |          | 0.03            | -0.18 – 0.23  | 0.805    |               |               |          |
| Social-Media-Use                 |                      |               |          |                   |               |          |          |               |          |                 |               |          | 0.02          | -0.11 – 0.15  | 0.772    |



**Table S48.**

Study 5 (ad hominem): two-way interactions with technique discernment between condition and age, gender, education level, political ideology, populism, analytical thinking, bullshit receptivity, conspiracy belief, numerical thinking, social media use, and how often people check the news.

| Predictors                               | Age      |               |          | Gender   |               |          | Education |               |          | Political Ideology |               |          | Populism |               |          | Analytical Thinking |               |          |               |
|------------------------------------------|----------|---------------|----------|----------|---------------|----------|-----------|---------------|----------|--------------------|---------------|----------|----------|---------------|----------|---------------------|---------------|----------|---------------|
|                                          | <i>b</i> | 95% <i>CI</i> | <i>p</i> | <i>b</i> | 95% <i>CI</i> | <i>p</i> | <i>b</i>  | 95% <i>CI</i> | <i>p</i> | <i>b</i>           | 95% <i>CI</i> | <i>p</i> | <i>b</i> | 95% <i>CI</i> | <i>p</i> | <i>b</i>            | 95% <i>CI</i> | <i>p</i> |               |
| (Intercept)                              | 2.07     | 1.72 – 2.42   | <0.001   | 1.74     | 1.54 – 1.94   | <0.001   | 2.16      | 1.52 – 2.80   | <0.001   | 2.5                | 2.19 – 2.81   | <0.001   | 2.7      | 1.75 – 3.66   | <0.001   | 1.35                | 1.13 – 1.57   | <0.001   |               |
| Condition                                | -0.11    | -0.23 – 0.00  | 0.055    |          |               |          |           |               |          |                    |               |          |          |               |          |                     |               |          |               |
| Age                                      | 0.71     | 0.21 – 1.20   | 0.005    | 0.63     | 0.34 – 0.92   | <0.001   | 0.71      | -0.20 – 1.61  | 0.127    | 0.52               | 0.09 – 0.95   | 0.018    | 0.45     | -0.87 – 1.76  | 0.506    | 0.9                 | 0.59 – 1.21   | <0.001   |               |
| Age * Condition                          | 0.02     | -0.14 – 0.18  | 0.769    |          |               |          |           |               |          |                    |               |          |          |               |          |                     |               |          |               |
| Gender                                   |          |               |          | 0.01     | -0.28 – 0.30  | 0.941    |           |               |          |                    |               |          |          |               |          |                     |               |          |               |
| Gender * Condition                       |          |               |          | 0.25     | -0.16 – 0.66  | 0.237    |           |               |          |                    |               |          |          |               |          |                     |               |          |               |
| Education                                |          |               |          |          |               |          | -0.1      | -0.26 – 0.05  | 0.201    |                    |               |          |          |               |          |                     |               |          |               |
| Education * Condition                    |          |               |          |          |               |          | 0.01      | -0.21 – 0.24  | 0.907    |                    |               |          |          |               |          |                     |               |          |               |
| Political-Ideology                       |          |               |          |          |               |          |           |               |          | -                  | -0.30 – -     | <0.001   |          |               |          |                     |               |          |               |
| Political-Ideology * Condition           |          |               |          |          |               |          |           |               |          | 0.22               | 0.14          |          |          |               |          |                     |               |          |               |
| Populism                                 |          |               |          |          |               |          |           |               |          | 0.06               | -0.05 – 0.18  | 0.28     |          |               |          |                     |               |          |               |
| Populism * Condition                     |          |               |          |          |               |          |           |               |          |                    |               |          | -0.25    | -0.49 – -0.00 | 0.05     |                     |               |          |               |
| Analytical-Thinking                      |          |               |          |          |               |          |           |               |          |                    |               |          | 0.08     | -0.26 – 0.42  | 0.654    |                     |               |          |               |
| Analytical-Thinking * Condition          |          |               |          |          |               |          |           |               |          |                    |               |          |          |               |          | 0.36                | 0.21 – 0.50   | <0.001   |               |
| Observations                             |          | 1103          |          |          | 1086          |          |           | 1103          |          |                    | 1102          |          |          | 1101          |          |                     | -0.12         | -        | 0.267         |
| R <sup>2</sup> / R <sup>2</sup> adjusted |          | 0.053 / 0.050 |          |          | 0.050 / 0.047 |          |           | 0.050 / 0.047 |          |                    | 0.083 / 0.080 |          |          | 0.052 / 0.050 |          |                     |               |          | 0.073 / 0.071 |

  

| Predictors                       | Bullshit Receptivity |               |          | Conspiracy Belief |               |          | Numeracy |               |          | Soc. Media. Use |               |          | News Checking |               |          |
|----------------------------------|----------------------|---------------|----------|-------------------|---------------|----------|----------|---------------|----------|-----------------|---------------|----------|---------------|---------------|----------|
|                                  | <i>b</i>             | 95% <i>CI</i> | <i>p</i> | <i>b</i>          | 95% <i>CI</i> | <i>p</i> | <i>b</i> | 95% <i>CI</i> | <i>p</i> | <i>b</i>        | 95% <i>CI</i> | <i>p</i> | <i>b</i>      | 95% <i>CI</i> | <i>p</i> |
| (Intercept)                      | 3.36                 | 2.93 – 3.79   | <0.001   | 3                 | 2.55 – 3.46   | <0.001   | 0.04     | -0.40 – 0.48  | 0.864    | 1.51            | 0.92 – 2.11   | <0.001   | 1.12          | 0.52 – 1.71   | <0.001   |
| Condition                        | 0.76                 | 0.15 – 1.38   | 0.015    | 0.28              | -0.35 – 0.91  | 0.389    | 1.43     | 0.82 – 2.05   | <0.001   | 0.79            | -0.03 – 1.62  | 0.06     | 1.19          | 0.34 – 2.04   | 0.006    |
| Bullshit-Receptivity             | -0.58                | -0.73 – -0.43 | <0.001   |                   |               |          |          |               |          |                 |               |          |               |               |          |
| Bullshit-Receptivity * Condition | 0                    | -0.20 – 0.21  | 0.966    |                   |               |          |          |               |          |                 |               |          |               |               |          |
| Conspiracy-Belief                |                      |               |          | -                 | -2.64 – -1.27 | <0.001   |          |               |          |                 |               |          |               |               |          |
| Conspiracy-Belief * Condition    |                      |               |          | 1.95              | -0.25 – 1.66  | 0.148    |          |               |          |                 |               |          |               |               |          |
| Numerical-Thinking               |                      |               |          |                   |               |          | 0.56     | 0.43 – 0.70   | <0.001   |                 |               |          |               |               |          |
| Numerical-Thinking * Condition   |                      |               |          |                   |               |          | -        | -0.41 – -0.03 | 0.024    |                 |               |          |               |               |          |
| Social-Media-Use                 |                      |               |          |                   |               |          | 0.22     |               |          | 0.06            | -0.09 – 0.21  | 0.416    |               |               |          |

|                                          |               |               |               |      |               |       |       |               |
|------------------------------------------|---------------|---------------|---------------|------|---------------|-------|-------|---------------|
| Social-Media-Use *                       |               |               |               | -    | -0.21 – 0.20  | 0.941 |       |               |
| Condition                                |               |               |               | 0.01 |               |       |       |               |
| News-Check                               |               |               |               |      |               |       | 0.17  | 0.02 – 0.33   |
| News-Check *                             |               |               |               |      |               |       |       | <b>0.031</b>  |
| Condition                                |               |               |               |      |               |       | -0.11 | -0.33 – 0.11  |
| Observations                             | 1101          | 1101          | 1102          |      | 1103          |       |       | 1103          |
| R <sup>2</sup> / R <sup>2</sup> adjusted | 0.139 / 0.137 | 0.085 / 0.082 | 0.118 / 0.116 |      | 0.049 / 0.046 |       |       | 0.052 / 0.049 |



**Table S49.**

Study 6 (emotional language replication study): Student's and Bayesian *t*-tests for technique recognition, trustworthiness, and sharing. *Note*: "Fake" denotes the averaged scores (per participant) for the manipulative stimuli; "Real" denotes the averaged scores per participant for the non-manipulative stimuli.

| Measure                      |                    | Statistic   | ±%       | df   | <i>p</i> | <i>M</i> <sub>diff</sub> | Cohen's <i>d</i> | 95% CI         |
|------------------------------|--------------------|-------------|----------|------|----------|--------------------------|------------------|----------------|
| Discernment-Manipulativeness | Student's <i>t</i> | -10.869     |          | 1066 | < .001   | -0.94                    | -0.67            | [-0.79, -0.54] |
|                              | BF <sub>10</sub>   | 8.26E+22    | 1.39E-28 |      |          |                          |                  |                |
| Discernment-Trustworthiness  | Student's <i>t</i> | -7.213      |          | 1063 | < .001   | -0.49                    | -0.44            | [-0.56, -0.32] |
|                              | BF <sub>10</sub>   | 5.45e0+9    | 3.34E-15 |      |          |                          |                  |                |
| Discernment-Sharing          | Student's <i>t</i> | -5.547      |          | 1063 | < .001   | -0.37                    | -0.34            | [-0.46, -0.22] |
|                              | BF <sub>10</sub>   | 219328.3771 | 9.90E-11 |      |          |                          |                  |                |
| Fake-Manipulativeness        | Student's <i>t</i> | -12.359     |          | 1066 | < .001   | -0.93                    | -0.76            | [-0.88, -0.63] |
|                              | BF <sub>10</sub>   | 3.45E+29    | 2.56E-35 |      |          |                          |                  |                |
| Real-Manipulativeness        | Student's <i>t</i> | 0.274       |          | 1063 | 0.785    | 0.02                     | 0.02             | [-0.10, 0.14]  |
|                              | BF <sub>10</sub>   | 0.071       | 4.08e0-4 |      |          |                          |                  |                |
| Fake-Trustworthiness         | Student's <i>t</i> | 3.97        |          | 1066 | < .001   | 0.20                     | 0.24             | [0.12, 0.36]   |
|                              | BF <sub>10</sub>   | 154.894     | 1.66e0-7 |      |          |                          |                  |                |
| Real-Trustworthiness         | Student's <i>t</i> | -4.867      |          | 1063 | < .001   | -0.29                    | -0.30            | [-0.42, -0.18] |
|                              | BF <sub>10</sub>   | 7246.488    | 3.19e0-9 |      |          |                          |                  |                |
| Fake-Sharing                 | Student's <i>t</i> | 1.248       |          | 1066 | 0.212    | 0.10                     | 0.08             | [-0.04, 0.20]  |
|                              | BF <sub>10</sub>   | 0.148       | 2.00e0-4 |      |          |                          |                  |                |
| Real-Sharing                 | Student's <i>t</i> | -3.275      |          | 1063 | 0.001    | -0.28                    | -0.20            | [-0.32 -0.08]  |
|                              | BF <sub>10</sub>   | 13.276      | 1.97e0-6 |      |          |                          |                  |                |

<sup>a</sup> Levene's test is significant (*p* < .05), suggesting a violation of the assumption of equal variances

**Table S50.**

Study 6 (emotional language replication study): ANOVAs for manipulateness (technique recognition), trustworthiness, and sharing discernment as predicted by condition (control – inoculation) and outcome measure response order (manipulateness – trustworthiness – sharing; trustworthiness – manipulateness – sharing; or sharing – trustworthiness – manipulateness).

ANOVA - Discernment-Manipulateness

|                   | <b>Sum of Squares</b> | <b>df</b> | <b>Mean Square</b> | <b>F</b> | <b><i>p</i></b> |
|-------------------|-----------------------|-----------|--------------------|----------|-----------------|
| Condition         | 237.713               | 1         | 237.7127           | 117.7046 | < .001          |
| Order             | 17.89                 | 2         | 8.945              | 4.4292   | 0.012           |
| Condition * Order | 0.191                 | 2         | 0.0956             | 0.0473   | 0.954           |
| Residuals         | 2156.901              | 1068      | 2.0196             |          |                 |

ANOVA - Discernment-Trustworthiness

|                   | <b>Sum of Squares</b> | <b>df</b> | <b>Mean Square</b> | <b>F</b> | <b><i>p</i></b> |
|-------------------|-----------------------|-----------|--------------------|----------|-----------------|
| Condition         | 61.35                 | 1         | 61.35              | 50.46    | < .001          |
| Order             | 5.94                  | 2         | 2.97               | 2.44     | 0.088           |
| Condition * Order | 2.55                  | 2         | 1.27               | 1.05     | 0.351           |
| Residuals         | 1294.68               | 1065      | 1.22               |          |                 |

ANOVA - Discernment-Sharing

|                   | <b>Sum of Squares</b> | <b>df</b> | <b>Mean Square</b> | <b>F</b> | <b><i>p</i></b> |
|-------------------|-----------------------|-----------|--------------------|----------|-----------------|
| Condition         | 34.883                | 1         | 34.883             | 29.27    | < .001          |
| Order             | 5.742                 | 2         | 2.871              | 2.409    | 0.09            |
| Condition * Order | 0.968                 | 2         | 0.484              | 0.406    | 0.666           |
| Residuals         | 1269.227              | 1065      | 1.192              |          |                 |

**Table S51.**

Study 6 (emotional language replication study): Student's and Bayesian *t*-tests for technique recognition, trustworthiness, and sharing, separated by outcome measure response order. *Note:* "Fake" denotes the averaged scores (per participant) for the manipulative stimuli; "Real" for the non-manipulative stimuli. MTS = manipulativeness–trustworthiness–sharing; TSM = trustworthiness–sharing–manipulativeness; SMT = sharing–manipulativeness–trustworthiness.

| MTS                          |                    | Statistic | ±%       | df  | <i>p</i> | <i>M<sub>diff</sub></i> | Cohen's <i>d</i> | 95% CI         |
|------------------------------|--------------------|-----------|----------|-----|----------|-------------------------|------------------|----------------|
| Discernment-Manipulativeness | Student's <i>t</i> | -6.312    |          | 365 | < .001   | -0.96                   | -0.66            | [-0.88, -0.44] |
|                              | BF <sub>10</sub>   | 1.09E+07  | 5.90E-15 |     |          |                         |                  |                |
| Discernment-Trustworthiness  | Student's <i>t</i> | -3.137    |          | 365 | 0.002    | -0.37                   | -0.33            | [-0.54, -0.12] |
|                              | BF <sub>10</sub>   | 12.571    | 1.12e0-8 |     |          |                         |                  |                |
| Discernment-Sharing          | Student's <i>t</i> | -3.023    |          | 365 | 0.003    | -0.34                   | -0.32            | [-0.52, -0.11] |
|                              | BF <sub>10</sub>   | 9.032     | 1.57e0-8 |     |          |                         |                  |                |
| Fake-Manipulativeness        | Student's <i>t</i> | -6.597    |          | 365 | < .001   | -0.81                   | -0.69            | [-0.91, -0.47] |
|                              | BF <sub>10</sub>   | 5.49E+07  | 1.04E-15 |     |          |                         |                  |                |
| Real-Manipulativeness        | Student's <i>t</i> | 1.282     |          | 365 | 0.201    | 0.15                    | 0.13             | [-0.07, 0.34]  |
|                              | BF <sub>10</sub>   | 0.255     | 5.72e0-7 |     |          |                         |                  |                |
| Fake-Trustworthiness         | Student's <i>t</i> | 0.77      |          | 365 | 0.442    | 0.07                    | 0.08             | [-0.12, 0.29]  |
|                              | BF <sub>10</sub>   | 0.154     | 9.39e0-7 |     |          |                         |                  |                |
| Real-Trustworthiness         | Student's <i>t</i> | -3.003    |          | 365 | 0.003    | -0.30                   | -0.31            | [-0.52, -0.11] |
|                              | BF <sub>10</sub>   | 8.522     | 1.67e0-8 |     |          |                         |                  |                |
| Fake-Sharing                 | Student's <i>t</i> | 0.733     |          | 365 | 0.464    | 0.09                    | 0.08             | [-0.13, 0.28]  |
|                              | BF <sub>10</sub>   | 0.15      | 9.64e0-7 |     |          |                         |                  |                |
| Real-Sharing                 | Student's <i>t</i> | -1.721    |          | 365 | 0.086    | -0.25                   | -0.18            | [-0.39, 0.03]  |
|                              | BF <sub>10</sub>   | 0.479     | 3.06e0-7 |     |          |                         |                  |                |
| TSM                          |                    | Statistic | ±%       | df  | <i>p</i> | <i>M<sub>diff</sub></i> | Cohen's <i>d</i> | 95% CI         |
| Discernment-Manipulativeness | Student's <i>t</i> | -6.151    |          | 362 | < .001   | -0.91                   | -0.64            | [-0.86, -0.43] |
|                              | BF <sub>10</sub>   | 4.46E+06  | 1.44E-14 |     |          |                         |                  |                |
| Discernment-Trustworthiness  | Student's <i>t</i> | -5.369    |          | 361 | < .001   | -0.60                   | -0.56            | [-0.78, -0.35] |
|                              | BF <sub>10</sub>   | 79771.445 | 1.04E-12 |     |          |                         |                  |                |
| Discernment-Sharing          | Student's <i>t</i> | -3.762    |          | 361 | < .001   | -0.44                   | -0.40            | [-0.60, -0.18] |
|                              | BF <sub>10</sub>   | 95.103    | 1.31e0-9 |     |          |                         |                  |                |
| Fake-Manipulativeness        | Student's <i>t</i> | -6.638    |          | 362 | < .001   | -0.87                   | -0.70            | [-0.91, -0.48] |
|                              | BF <sub>10</sub>   | 6.86E+07  | 7.51E-16 |     |          |                         |                  |                |
| Real-Manipulativeness        | Student's <i>t</i> | 0.421     |          | 361 | 0.674    | 0.05                    | 0.04             | [-0.16, 0.25]  |
|                              | BF <sub>10</sub>   | 0.126     | 1.12e0-6 |     |          |                         |                  |                |
| Fake-Trustworthiness         | Student's <i>t</i> | 2.895     |          | 362 | 0.004    | 0.27                    | 0.30             | [0.10, 0.51]   |
|                              | BF <sub>10</sub>   | 6.318     | 2.23e0-8 |     |          |                         |                  |                |
| Real-Trustworthiness         | Student's <i>t</i> | -3.403    |          | 361 | < .001   | -0.34                   | -0.36            | [-0.57, -0.15] |
|                              | BF <sub>10</sub>   | 28.485    | 4.61e0-9 |     |          |                         |                  |                |
| Fake-Sharing                 | Student's <i>t</i> | 1.398     |          | 362 | 0.163    | 0.18                    | 0.15             | [-0.06, 0.35]  |
|                              | BF <sub>10</sub>   | 0.296     | 4.88e0-7 |     |          |                         |                  |                |
| Real-Sharing                 | Student's <i>t</i> | -1.827    |          | 361 | 0.069    | -0.27                   | -0.19            | [-0.40, 0.02]  |
|                              | BF <sub>10</sub>   | 0.575     | 2.50e0-7 |     |          |                         |                  |                |
| SMT                          |                    | Statistic | ±%       | df  | <i>p</i> | <i>M<sub>diff</sub></i> | Cohen's <i>d</i> | 95% CI         |
| Discernment-Manipulativeness | Student's <i>t</i> | -6.337    |          | 341 | < .001   | -0.96                   | -0.69            | [0.91, -0.46]  |
|                              | BF <sub>10</sub>   | 1.18e0+7  | 8.06E-16 |     |          |                         |                  |                |
| Discernment-Trustworthiness  | Student's <i>t</i> | -3.858    |          | 339 | < .001   | -0.47                   | -0.42            | [-0.64, -0.20] |
|                              | BF <sub>10</sub>   | 134.884   | 3.45E-10 |     |          |                         |                  |                |
| Discernment-Sharing          | Student's <i>t</i> | -2.581    |          | 339 | 0.01     | -0.30                   | -0.28            | [-0.49, -0.06] |
|                              | BF <sub>10</sub>   | 2.864     | 2.66e0-8 |     |          |                         |                  |                |
| Fake-Manipulativeness        | Student's <i>t</i> | -8.518    |          | 341 | < .001   | -1.15                   | -0.92            | [-1.15, -0.69] |
|                              | BF <sub>10</sub>   | 9.72E+12  | 3.83E-21 |     |          |                         |                  |                |
| Real-Manipulativeness        | Student's <i>t</i> | -1.665    |          | 339 | 0.097    | -0.19                   | -0.18            | [-0.39, 0.03]  |
|                              | BF <sub>10</sub>   | 0.451     | 1.98e0-7 |     |          |                         |                  |                |
| Fake-Trustworthiness         | Student's <i>t</i> | 3.139     |          | 341 | 0.002    | 0.27                    | 0.34             | [0.12, 0.55]   |
|                              | BF <sub>10</sub>   | 12.862    | 5.53e0-9 |     |          |                         |                  |                |
| Real-Trustworthiness         | Student's <i>t</i> | -1.923    |          | 339 | 0.055    | -0.20                   | -0.21            | [-0.42, 0.01]  |
|                              | BF <sub>10</sub>   | 0.701     | 1.23e0-7 |     |          |                         |                  |                |
| Fake-Sharing                 | Student's <i>t</i> | 0.13      |          | 341 | 0.897    | 0.02                    | 0.01             | [-0.20, 0.23]  |
|                              | BF <sub>10</sub>   | 0.12      | 8.42e0-7 |     |          |                         |                  |                |
| Real-Sharing                 | Student's <i>t</i> | -1.941    |          | 339 | 0.053    | -0.29                   | -0.21            | [-0.42, 0.00]  |
|                              | BF <sub>10</sub>   | 0.726     | 1.19e0-7 |     |          |                         |                  |                |

<sup>a</sup> Levene's test is significant ( $p < .05$ ), suggesting a violation of the assumption of equal variances

**Table S52.**

Study 6 (emotional language replication study): linear regression for manipulativeness, trustworthiness and sharing discernment, as predicted by condition (control – inoculation) and the five personality dimensions from the 10-item Personality Inventory.

| Predictor              | Manipulativeness |           |                      |          | Trustworthiness |           |                      |          | Sharing  |           |                      |          |
|------------------------|------------------|-----------|----------------------|----------|-----------------|-----------|----------------------|----------|----------|-----------|----------------------|----------|
|                        | <i>b</i>         | <i>SE</i> | <i>t</i>             | <i>p</i> | <i>b</i>        | <i>SE</i> | <i>t</i>             | <i>p</i> | <i>b</i> | <i>SE</i> | <i>t</i>             | <i>p</i> |
| Intercept <sup>a</sup> | 1.1361           | 0.2784    | 4.0810               | < .001   | 1.3744          | 0.2187    | 6.2850               | < .001   | 0.0156   | 0.2170    | 0.0717               | 0.9430   |
| Condition:             |                  |           |                      |          |                 |           |                      |          |          |           |                      |          |
| Inoculation – Control  | 0.9351           | 0.0860    | 10.8730              | < .001   | 0.4828          | 0.0675    | 7.1480               | < .001   | 0.3639   | 0.0670    | 5.4279               | < .001   |
| Openness               | 0.0907           | 0.0376    | 2.4090               | 0.0160   | 0.0286          | 0.0295    | 0.9690               | 0.3330   | 0.0301   | 0.0293    | 1.0269               | 0.3050   |
| Conscientiousness      | 0.0308           | 0.0399    | 0.7720               | 0.4400   | 0.0079          | 0.0314    | 0.2520               | 0.8010   | -0.0012  | 0.0311    | -0.0372              | 0.9700   |
| Extraversion           | -0.0960          | 0.0273    | -3.5200              | < .001   | -0.0462         | 0.0214    | -2.1610              | 0.0310   | -0.0310  | 0.0212    | -1.4608              | 0.1440   |
| Agreeableness          | 0.0440           | 0.0385    | 1.1430               | 0.2530   | 0.0623          | 0.0302    | 2.0630               | 0.0390   | 0.0327   | 0.0299    | 1.0920               | 0.2750   |
| Neuroticism            | -0.0646          | 0.0313    | -2.0610              | 0.0400   | -0.0400         | 0.0246    | -1.6250              | 0.1040   | 0.0158   | 0.0244    | 0.6463               | 0.5180   |
|                        |                  | <b>R</b>  | <b>R<sup>2</sup></b> |          |                 | <b>R</b>  | <b>R<sup>2</sup></b> |          |          | <b>R</b>  | <b>R<sup>2</sup></b> |          |
|                        |                  | 0.345     | 0.119                |          |                 | 0.239     | 0.0573               |          |          | 0.181     | 0.0328               |          |

<sup>a</sup> Represents reference level

**Table S53.**

Study 6 (emotional language replication study): linear regression for manipulativeness, trustworthiness and sharing discernment, as predicted by condition (control – inoculation) and actively open-minded thinking (AOT). See also Figure S5.

| Predictor              | Manipulativeness |           |                      |          | Trustworthiness |           |                      |          | Sharing  |           |                      |          |
|------------------------|------------------|-----------|----------------------|----------|-----------------|-----------|----------------------|----------|----------|-----------|----------------------|----------|
|                        | <i>b</i>         | <i>SE</i> | <i>t</i>             | <i>p</i> | <i>b</i>        | <i>SE</i> | <i>t</i>             | <i>p</i> | <i>b</i> | <i>SE</i> | <i>t</i>             | <i>p</i> |
| Intercept <sup>a</sup> | -1.625           | 0.59      | -2.76                | 0.006    | 0.194           | 0.488     | 0.398                | 0.691    | -0.962   | 0.475     | -2.03                | 0.043    |
| Condition:             |                  |           |                      |          |                 |           |                      |          |          |           |                      |          |
| Inoculation – Control  | 0.971            | 0.146     | 6.67                 | < .001   | 0.467           | 0.12      | 3.875                | < .001   | 0.305    | 0.117     | 2.6                  | 0.01     |
| AOT                    | 0.686            | 0.138     | 4.96                 | < .001   | 0.296           | 0.114     | 2.591                | 0.01     | 0.287    | 0.111     | 2.58                 | 0.01     |
|                        |                  | <b>R</b>  | <b>R<sup>2</sup></b> |          |                 | <b>R</b>  | <b>R<sup>2</sup></b> |          |          | <b>R</b>  | <b>R<sup>2</sup></b> |          |
|                        |                  | 0.415     | 0.173                |          |                 | 0.248     | 0.0617               |          |          | 0.198     | 0.0391               |          |

<sup>a</sup> Represents reference level

**Table S54.**

Study 6 (emotional language replication study): linear regression for manipulativeness, trustworthiness and sharing discernment, as predicted by condition (control – inoculation) and Veracity Discernment Ability (MIST20\_VDA, i.e., ability to distinguish true from false headlines), as measured by the 20-item Misinformation Susceptibility Test (MIST). See also Figure S6.

| Predictor              | Manipulativeness |           |                      |          | Trustworthiness |           |                      |          | Sharing  |           |                      |          |
|------------------------|------------------|-----------|----------------------|----------|-----------------|-----------|----------------------|----------|----------|-----------|----------------------|----------|
|                        | <i>b</i>         | <i>SE</i> | <i>t</i>             | <i>p</i> | <i>b</i>        | <i>SE</i> | <i>t</i>             | <i>p</i> | <i>b</i> | <i>SE</i> | <i>t</i>             | <i>p</i> |
| Intercept <sup>a</sup> | -1.993           | 0.412     | -4.83                | < .001   | -0.303          | 0.35      | -0.865               | 0.388    | -1.257   | 0.343     | -3.66                | < .001   |
| Condition:             |                  |           |                      |          |                 |           |                      |          |          |           |                      |          |
| Inoculation – Control  | 0.969            | 0.139     | 6.99                 | < .001   | 0.46            | 0.118     | 3.903                | < .001   | 0.306    | 0.116     | 2.65                 | 0.009    |
| MIST20_VDA             | 3.883            | 0.479     | 8.1                  | < .001   | 2.085           | 0.407     | 5.123                | < .001   | 1.794    | 0.399     | 4.5                  | < .001   |
|                        |                  | <b>R</b>  | <b>R<sup>2</sup></b> |          |                 | <b>R</b>  | <b>R<sup>2</sup></b> |          |          | <b>R</b>  | <b>R<sup>2</sup></b> |          |
|                        |                  | 0.508     | 0.258                |          |                 | 0.335     | 0.112                |          |          | 0.277     | 0.0766               |          |

<sup>a</sup> Represents reference level

**Table S55.**

Study 7 (YouTube field study): results from the field study for each item, showing the total number of YouTube users who saw each item, total samples sizes (number of survey responses) in the experimental (inoculation) and control conditions, number of correct responses in the experimental and control conditions, the proportion of correct responses in the experimental and control conditions, the results of two-sample  $z$ -tests, and the Cohen's  $h$  effect sizes.

| Study                     | Total item views | Total $N$ | $n_{control}$ | $n_{inoculation}$ | $n_{correct,control}$ | $n_{correct,inoculation}$ | $SD_{control}$ | $SD_{inoculation}$ | % correct (inoculation) | % correct (control) | $z$  | $p$            | Cohen's $h$ |
|---------------------------|------------------|-----------|---------------|-------------------|-----------------------|---------------------------|----------------|--------------------|-------------------------|---------------------|------|----------------|-------------|
| <b>Emotional language</b> |                  |           |               |                   |                       |                           |                |                    |                         |                     |      |                |             |
| Item 1 (airline)          | 645,000          | 4143      | 2083          | 2060              | 1390                  | 1384                      | 21.51          | 21.31              | 0.672                   | 0.667               | 0.31 | 0.757          | 0.01        |
| Item 2 (senior)           | 699,000          | 2393      | 1204          | 1189              | 644                   | 691                       | 17.31          | 17.01              | 0.581                   | 0.535               | 2.28 | <b>0.023</b>   | 0.09        |
| Item 3 (TV show)          | 389,000          | 3725      | 1862          | 1863              | 669                   | 741                       | 20.70          | 21.13              | 0.398                   | 0.359               | 2.42 | <b>0.016</b>   | 0.08        |
| Average (all 3 items)     | 1,733,000        | 10261     | 5149          | 5112              | 2703                  | 2816                      | 35.83          | 35.56              | 0.551                   | 0.525               | 2.63 | <b>0.009</b>   | 0.05        |
| <b>False Dichotomies</b>  |                  |           |               |                   |                       |                           |                |                    |                         |                     |      |                |             |
| Item 1 (education)        | 231,000          | 4186      | 2014          | 2172              | 669                   | 940                       | 21.13          | 23.09              | 0.433                   | 0.332               | 6.69 | < <b>0.001</b> | 0.21        |
| Item 2 (caffeine)         | 378,000          | 4064      | 2035          | 2029              | 852                   | 906                       | 22.26          | 22.40              | 0.447                   | 0.419               | 1.79 | 0.073          | 0.06        |
| Item 3 (solution)         | 330,000          | 4121      | 2002          | 2119              | 757                   | 950                       | 21.70          | 22.89              | 0.448                   | 0.378               | 4.57 | < <b>0.001</b> | 0.14        |
| Average (all 3 items)     | 939,000          | 12371     | 6051          | 6320              | 2278                  | 2796                      | 37.69          | 39.48              | 0.442                   | 0.376               | 7.45 | < <b>0.001</b> | 0.13        |
| <b>All items</b>          |                  |           |               |                   |                       |                           |                |                    |                         |                     |      |                |             |
| Average (all 6 items)     | 2,672,000        | 22632     | 11200         | 11432             | 4981                  | 5612                      | 52.59          | 53.45              | 0.491                   | 0.445               | 6.96 | < <b>0.001</b> | 0.09        |

**Table S56.**

Study 7 (YouTube field study): YouTube ad campaign budget, costs, view rates, median time between viewing the ad and responding to the survey question (solicitation gap), and costs per view, by campaign (emotional language video & false dichotomies video).

| Campaign           | Item          | Budget              | Cost                | Impressions    | Views         | View rate     | Median solicitation gap (hours) | Avg cost per view |
|--------------------|---------------|---------------------|---------------------|----------------|---------------|---------------|---------------------------------|-------------------|
| Emotional language | 1 (airline)   | \$ 10,000.00        | \$ 6,003.30         | 995219         | 140651        | 14.13%        | 17.8                            | \$ 0.04           |
|                    | 2 (senior)    | \$ 11,000.00        | \$ 8,732.82         | 1275319        | 163892        | 12.85%        | 20.7                            | \$ 0.05           |
|                    | 3 (TV show)   | \$ 10,000.00        | \$ 6,865.83         | 1019829        | 117828        | 11.55%        | 18.7                            | \$ 0.06           |
|                    | <b>Total</b>  | <b>\$ 31,000.00</b> | <b>\$ 21,601.95</b> | <b>3290367</b> | <b>422371</b> | <b>12.84%</b> | <b>19.1</b>                     | <b>\$ 0.05</b>    |
| False dichotomies  | 1 (education) | \$ 10,000.00        | \$ 5,112.68         | 540337         | 142230        | 26.32%        | 15.4                            | \$ 0.04           |
|                    | 2 (caffeine)  | \$ 11,000.00        | \$ 8,799.83         | 868632         | 219869        | 25.31%        | 20.1                            | \$ 0.04           |
|                    | 3 (solution)  | \$ 10,000.00        | \$ 6,784.74         | 747698         | 182877        | 24.46%        | 17.6                            | \$ 0.04           |
|                    | <b>Total</b>  | <b>\$ 31,000.00</b> | <b>\$ 20,697.25</b> | <b>2156667</b> | <b>544976</b> | <b>25.36%</b> | <b>17.7</b>                     | <b>\$ 0.04</b>    |
| <b>Total</b>       |               | <b>\$ 62,000.00</b> | <b>\$ 42,299.20</b> | <b>5447034</b> | <b>967347</b> | <b>19.10%</b> | <b>18.4</b>                     | <b>\$ 0.05</b>    |

## REFERENCES AND NOTES

1. S. Lewandowsky, U. K. H. Ecker, J. Cook, Beyond misinformation: Understanding and coping with the “Post-Truth” era. *J. Appl. Res. Mem. Cogn.* **6**, 353–369 (2017).
2. J. Roozenbeek, C. R. Schneider, S. Dryhurst, J. Kerr, A. L. J. Freeman, G. Recchia, A. M. van der Bles, S. van der Linden, Susceptibility to misinformation about COVID-19 around the world. *R. Soc. Open Sci.* **7**, 201199 (2020).
3. S. Loomba, A. de Figueiredo, S. J. Piatek, K. de Graaf, H. J. Larson, Measuring the impact of COVID-19 vaccine misinformation on vaccination intent in the UK and USA. *Nat. Hum. Behav.* **5**, 337–348 (2021).
4. J. Roozenbeek, S. van der Linden, Fake news game confers psychological resistance against online misinformation. *Humanit. Soc. Sci. Commun.* **5**, 1–10 (2019).
5. S. Lewandowsky, M. Yesilada, Inoculating against the spread of Islamophobic and radical-Islamist disinformation. *Cogn. Res. Princ. Implic.* **6**, 57 (2021).
6. G. Pennycook, Z. Epstein, M. Mosleh, A. Arechar, D. Eckles, D. G. Rand, Shifting attention to accuracy can reduce misinformation online. *Nature* **592**, 590–595 (2021).
7. M. Mosleh, C. Martel, D. Eckles, D. G. Rand, in *CHI '21: Proceedings of the 2021 CHI Conference on Human Factors in Computing Systems* (Yokohama, Japan, 8 to 13 May 2021), pp. 1–13.
8. J. Roozenbeek, S. van der Linden, How to combat health misinformation: A psychological approach. *Am. J. Health Promot.* **36**, 569–575 (2022).
9. S. Coleman, The elusiveness of political truth: From the conceit of objectivity to intersubjective judgement. *Eur. J. Commun.* **33**, 157–171 (2018).
10. F. Zollo, A. Bessi, M. Del Vicario, A. Scala, G. Caldarelli, L. Shekhtman, S. Havlin, W. Quattrociocchi, Debunking in a world of tribes. *PLOS ONE* **12**, 1–27 (2017).

11. B. Lyons, V. Mérola, J. Reifler, F. Stoeckel, How politics shape views toward fact-checking: Evidence from six European countries. *Int. J. Press.* **25**, 469–492 (2020).
12. J. J. Van Bavel, K. Baicker, P. S. Boggio, V. Capraro, A. Cichocka, M. Cikara, M. J. Crockett, A. J. Crum, K. M. Douglas, J. N. Druckman, J. Drury, O. Dube, N. Ellemers, E. J. Finkel, J. H. Fowler, M. Gelfand, S. Han, S. A. Haslam, J. Jetten, S. Kitayama, D. Mobbs, L. E. Napper, D. J. Packer, G. Pennycook, E. Peters, R. E. Petty, D. G. Rand, S. D. Reicher, S. Schnall, A. Shariff, L. J. Skitka, S. S. Smith, C. R. Sunstein, N. Tabri, J. A. Tucker, S. van der Linden, P. van Lange, K. A. Weeden, M. J. A. Wohl, J. Zaki, S. R. Zion, R. Willer, Using social and behavioural science to support COVID-19 pandemic response. *Nat. Hum. Behav.* **4**, 460–471 (2020).
13. S. Lewandowsky, U. K. H. Ecker, C. M. Seifert, N. Schwarz, J. Cook, Misinformation and its correction. *Psychol. Sci. Public Interes.* **13**, 106–131 (2012).
14. W. J. McGuire, D. Papageorgis, The relative efficacy of various types of prior belief-defense in producing immunity against persuasion. *J. Abnorm. Soc. Psychol.* **62**, 327–337 (1961).
15. J. Compton, in *The SAGE Handbook of Persuasion: Developments in Theory and Practice*, J. P. Dillard, L. Shen, Eds. (SAGE Publications Inc., ed. 2, 2013), pp. 220–236.
16. C. S. Traberg, J. Roozenbeek, S. van der Linden, Psychological inoculation against misinformation: Current evidence and future directions. *Ann. Am. Acad. Pol. Soc. Sci.* **700**, 136–151 (2022).
17. J. Cook, S. Lewandowsky, U. K. H. Ecker, Neutralizing misinformation through inoculation: Exposing misleading argumentation techniques reduces their influence. *PLOS ONE* **12**, 1–21 (2017).
18. C. Carrasco-Farré, The fingerprints of misinformation: How deceptive content differs from reliable sources in terms of cognitive effort and appeal to emotions. *Humanit. Soc. Sci. Commun.* **9**, 162 (2022).
19. A. Simchon, W. J. Brady, J. J. Van Bavel, Troll and divide: The language of online polarization. *PNAS Nexus* **1**, pgac019 (2021).



20. E. K. Vraga, S. C. Kim, J. Cook, Testing logic-based and humor-based corrections for science, health, and political misinformation on social media. *J. Broadcast. Electron. Media* **63**, 393–414 (2019).
21. H. O.-Y. Li, A. Bailey, D. Huynh, J. Chan, YouTube as a source of information on COVID-19: A pandemic of misinformation? *BMJ Glob. Heal.* **5**, e002604 (2020).
22. W. J. Brady, J. A. Wills, J. T. Jost, J. A. Tucker, J. J. Van Bavel, Emotion shapes the diffusion of moralized content in social networks. *Proc. Natl. Acad. Sci. U.S.A.* **114**, 7313–7318 (2017).
23. S. Lewandowsky, J. Cook, E. A. Lloyd, The “Alice in Wonderland” mechanics of the rejection of (climate) science: Simulating coherence by conspiracism. *Synthese* **195**, 175–196 (2016).
24. K. Escandón, A. L. Rasmussen, I. Bogoch, E. J. Murray, K. Escandón, J. Kindrachuk, COVID-19 and false dichotomies—A nuanced review of the evidence regarding public health, COVID-19 symptomatology, SARS-CoV-2 transmission, masks, and reinfection. *BMC Infect. Dis.* **21**, 710 (2021).
25. L. Atlani-Duault, J. K. Ward, M. Roy, C. Morin, A. Wilson, Tracking online heroisation and blame in epidemics. *Lancet Public Heal.* **5**, E137–E138 (2020).
26. D. Walton, *Ad Hominem Arguments* (The University of Alabama Press, 1998).
27. M. Basol, J. Roozenbeek, S. van der Linden, Good news about Bad News: Gamified inoculation boosts confidence and cognitive immunity against fake news. *J. Cogn.* **3**, 1–9 (2020).
28. S. McGrew, Learning to evaluate: An intervention in civic online reasoning. *Comput. Educ.* **145**, 103711 (2020).
29. G. Pennycook, J. Binnendyk, C. Newton, D. G. Rand, A practical guide to doing behavioral research on fake news and misinformation. *Collabra Psychol.* **7**, 25293 (2021).
30. Z. Epstein, N. Sirlin, A. Arechar, G. Pennycook, D. G. Rand, Social media sharing reduces truth discernment. *PsyArxiv Prepr.* 10.31234/osf.io/q4bd2 (2021).

31. J. J. Van Bavel, A. Pereira, The partisan brain: An identity-based model of political belief. *Trends Cogn. Sci.* **22**, 213–224 (2018).
32. G. Pennycook, D. G. Rand, Lazy, not biased: Susceptibility to partisan fake news is better explained by lack of reasoning than by motivated reasoning. *Cognition* **188**, 39–50 (2019).
33. J. Roozenbeek, R. Maertens, S. Herzog, M. Geers, R. Kurvers, M. Sultan, S. van der Linden, Susceptibility to misinformation is consistent across question framings and response modes and better explained by myside bias and partisanship than analytical thinking. *Judgm. Decis. Mak.* **17**, 547–573 (2022).
34. S. Rathje, J. Roozenbeek, C. S. Traberg, J. J. Van Bavel, S. van der Linden, Letter to the editors of psychological science: Meta-analysis reveals that accuracy nudges have little to no effect for US conservatives: Regarding pennycook et. al (2020). *Psychol. Sci.* 10.25384/SAGE.12594110.v2 (2022).
35. A. Akkerman, C. Mudde, A. Zaslove, How populist are the people? measuring populist attitudes in voters. *Comp. Polit. Stud.* **47**, 1324–1353 (2013).
36. G. Pennycook, J. A. Cheyne, N. Barr, D. J. Koehler, J. A. Fugelsang, On the reception and detection of pseudo-profound bullshit. *Judgm. Decis. Mak.* **10**, 549–563 (2015).
37. M. Bruder, P. Haffke, N. Neave, N. Nouripanah, R. Imhoff, Measuring individual differences in generic beliefs in conspiracy theories across cultures: Conspiracy mentality questionnaire. *Front. Psychol.* **4**, 225 (2013).
38. S. Frederick, Cognitive reflection and decision making. *J. Econ. Perspect.* **19**, 25–42 (2005).
39. S. D. Gosling, P. J. Rentfrow, W. B. Swann Jr., A very brief measure of the big-five personality domains. *J. Res. Pers.* **37**, 504–528 (2003).
40. J. Baron, Actively open-minded thinking in politics. *Cognition* **188**, 8–18 (2019).

41. R. Maertens, F. M. Götz, C. Schneider, J. Roozenbeek, J. Kerr, S. Stieger, W. P. McClanahan III, K. Drabot, S. van der Linden, The misinformation susceptibility test (MIST): A psychometrically validated measure of news veracity discernment. *PsyArxiv Prepr.* 10.31234/osf.io/gk68h (2022).
42. Wikipedia, List of most visited websites. *en.wikipedia.org* (2022); [https://en.wikipedia.org/wiki/List\\_of\\_most\\_visited\\_websites](https://en.wikipedia.org/wiki/List_of_most_visited_websites).
43. M. Alfano, A. E. Fard, J. A. Carter, P. Clutton, C. Klein, Technologically scaffolded atypical cognition: The case of YouTube’s recommender system. *Synthese* **199**, 835–858 (2021).
44. M. Faddoul, G. Chaslot, H. Farid, A longitudinal analysis of YouTube’s promotion of conspiracy videos (6 March 2020); arXiv:2003.03318 [cs.CY].
45. A. M. Guess, M. Lerner, B. Lyons, J. M. Montgomery, B. Nyhan, J. Reifler, N. Sircar, A digital media literacy intervention increases discernment between mainstream and false news in the United States and India. *Proc. Natl. Acad. Sci. U.S.A.* **117**, 15536–15545 (2020).
46. R. Maertens, J. Roozenbeek, M. Basol, S. van der Linden, Long-term effectiveness of inoculation against misinformation: Three longitudinal experiments. *J. Exp. Psychol. Appl.* **27**, 1–16 (2021).
47. M. Basol, J. Roozenbeek, M. Berriche, F. Uenal, W. McClanahan, S. van der Linden, Towards psychological herd immunity: Cross-cultural evidence for two prebunking interventions against COVID-19 misinformation. *Big Data Soc.* **8**, (2021).
48. K. A. Parker, S. A. Rains, B. Ivanov, Examining the “blanket of protection” conferred by inoculation: The effects of inoculation messages on the cross-protection of related attitudes. *Commun. Monogr.* **83**, 49–68 (2016).
49. J. A. Banas, S. A. Rains, A meta-analysis of research on inoculation theory. *Commun. Monogr.* **77**, 281–311 (2010).
50. M. E. Toplak, R. F. West, K. E. Stanovich, The cognitive reflection test as a predictor of performance on heuristics-and-biases tasks. *Mem. Cogn.* **39**, 1275–1289 (2011).

51. L. M. L. Schwartz, S. S. Woloshin, W. C. W. Black, H. G. H. Welch, The role of numeracy in understanding the benefit of screening mammography. *Ann. Intern. Med.* **127**, 966–972 (1997).
52. A. J. Wright, S. C. L. Whitwell, C. Takeichi, M. Hankins, T. M. Marteau, The impact of numeracy on reactions to different graphic risk presentation formats: An experimental analogue study. *Br. J. Health Psychol.* **14**, 107–125 (2009).
53. G. Pennycook, C. Martel, D. G. Rand, Knowing how fake news preys on your emotions can help you spot it. *CBC.ca* (2019); [www.cbc.ca/news/canada/saskatchewan/analysis-fake-news-appeals-to-emotion-1.5274207](http://www.cbc.ca/news/canada/saskatchewan/analysis-fake-news-appeals-to-emotion-1.5274207).
54. G. Pennycook, J. McPhetres, Y. Zhang, J. G. Lu, D. G. Rand, Fighting COVID-19 misinformation on social media: experimental evidence for a scalable accuracy-nudge intervention. *Psychol. Sci.* **31**, 770–780 (2020).
55. J. van Doorn, D. van den Bergh, U. Böhm, F. Dablander, K. Derks, T. Draws, A. Etz, N. J. Evans, Q. F. Gronau, J. M. Haaf, M. Hinne, Š. Kucharský, A. Ly, M. Marsman, D. Matzke, A. R. K. N. Gupta, A. Sarafoglou, A. Stefan, J. G. Voelkel, E.-J. Wagenmakers, The JASP guidelines for conducting and reporting a Bayesian analysis. *Psychon. Bull. Rev.* 813–826 (2021).
56. M. Berriche, S. Altay, Internet users engage more with phatic posts than with health misinformation on Facebook. *Humanit. Soc. Sci. Commun.* **6**, 1–9 (2020).
57. E. Fast, B. Chen, M. S. Bernstein, Empath: Understanding topic signals in large-scale text, in *Proceedings of the 2016 CHI Conference on Human Factors in Computing Systems* (San Jose, California, 7 to 12 May 2016), pp. 4647–4657.
